# Supplementary material
Source: PubMed Central journal article supplement (PMC2884379)
Supplement: NIHMS189877-supplement-supplement_1.pdf [file NIHMS189877-supplement-supplement_1.pdf]

**Supplementary Table S1 for *Interaction between Sleep and the Immune Response in Drosophila: A Role for the NFκB Relish***

Julie A. Williams, Ph.D; Sriram Sathyanarayanan, Ph.D;  
Joan C. Hendricks, V.M.D; Ph.D., Amita Sehgal, Ph.D.

Williams J; Sathyanarayanan S; Hendricks J et al. Interaction between sleep and the immune response in drosophila: a role for the nfκb relish. SLEEP 2007;30(4):389-400.

**Table S1.** Changes in gene expression in Deprivation vs Rebound. Genes with significant T-statistic values (Score) and fold change ( $\Delta$ ) as determined by SAM (significance analysis of microarrays) are listed for each condition and for each genotype. Genes in each functional category are listed in descending order according to the SAM score.

| <b>Genes Upregulated with Deprivation</b> |              | <i>y w</i> |              | <i>rosy</i> | <b>Description</b>                                                                                                                                                                                                                                                                                                                                                                                                             |
|-------------------------------------------|--------------|------------|--------------|-------------|--------------------------------------------------------------------------------------------------------------------------------------------------------------------------------------------------------------------------------------------------------------------------------------------------------------------------------------------------------------------------------------------------------------------------------|
| <b>Immune related genes</b>               | <b>Score</b> | $\Delta$   | <b>Score</b> | $\Delta$    |                                                                                                                                                                                                                                                                                                                                                                                                                                |
| Relish                                    | -1.428       | 2.734      | -2.963       | 2.912       | antibacterial polypeptide induction; antifungal polypeptide induction; immune response; nucleus; specific RNA polymerase II transcription factor activity; transcription factor activity                                                                                                                                                                                                                                       |
| cactus                                    | -1.282       | 2.304      | -2.933       | 2.084       | Tl signaling pathway; antifungal humoral response (sensu Invertebrata); antifungal polypeptide induction; antimicrobial humoral response (sensu Invertebrata); cytoplasm; defense response; dorsal appendage formation; dorsal/ventral axis specification; female gamete generation; immune response; negative regulation of protein-nucleus import; response to fungi; transcription factor binding, cytoplasmic sequestering |
| Aldehyde dehydrogenase type III           | -0.653       | 1.375      |              |             | aldehyde dehydrogenase activity, defense response                                                                                                                                                                                                                                                                                                                                                                              |
| kenny                                     | -0.638       | 1.332      |              |             | IkappaB kinase activity; IkappaB kinase complex; antibacterial polypeptide induction; antimicrobial humoral response (sensu Invertebrata)                                                                                                                                                                                                                                                                                      |
| Moca-cyp                                  | -0.615       | 1.242      |              |             | cyclophilin-type peptidyl-prolyl cis-trans isomerase activity; nucleus; peptidyl-prolyl cis-trans isomerase activity, defense                                                                                                                                                                                                                                                                                                  |
| Cecropin C                                |              |            | -3.884       | 6.750       | Gram-negative antibacterial peptide activity; Gram-positive antibacterial peptide activity; antibacterial humoral response (sensu Invertebrata); antibacterial peptide activity; antifungal peptide activity; extracellular                                                                                                                                                                                                    |
| Cecropin C                                |              |            | -3.232       | 5.310       | Gram-negative antibacterial peptide activity; Gram-positive antibacterial peptide activity; antibacterial humoral response (sensu Invertebrata); antibacterial peptide activity; antifungal peptide activity; extracellular                                                                                                                                                                                                    |
| Cecropin B                                |              |            | -2.695       | 4.571       | Gram-negative antibacterial peptide activity; Gram-positive antibacterial peptide activity; antibacterial humoral response (sensu Invertebrata); antibacterial peptide activity; antifungal peptide activity; extracellular                                                                                                                                                                                                    |
| Cecropin A2                               |              |            | -2.317       | 2.765       | Gram-negative antibacterial peptide activity; Gram-positive antibacterial peptide activity; antibacterial humoral response (sensu Invertebrata); antibacterial peptide activity; antifungal peptide activity                                                                                                                                                                                                                   |
| Cecropin A1                               |              |            | -2.139       | 2.709       | Gram-negative antibacterial peptide activity; Gram-positive antibacterial peptide activity; antibacterial humoral response (sensu Invertebrata); antibacterial peptide activity; antifungal peptide activity; extracellular                                                                                                                                                                                                    |

|                                              |        |       |        |       |                                                                                                                                                                                                                                                                                                                                                         |
|----------------------------------------------|--------|-------|--------|-------|---------------------------------------------------------------------------------------------------------------------------------------------------------------------------------------------------------------------------------------------------------------------------------------------------------------------------------------------------------|
| CG9733                                       |        |       | -2.039 | 2.844 | defense response; monophenol monooxygenase activator activity; proteolysis and peptidolysis; serine-type endopeptidase activity; trypsin activity                                                                                                                                                                                                       |
| necrotic                                     |        |       | -1.990 | 1.382 | Tl signaling pathway; antifungal humoral response (sensu Invertebrata); defense response; serine protease inhibitor activity                                                                                                                                                                                                                            |
| malvolio                                     |        |       | -1.318 | 1.443 | Natural resistance associated macrophage protein; cation transport (divalent cation (iron) uptake)                                                                                                                                                                                                                                                      |
| pelle                                        |        |       | -1.298 | 1.320 | Tl signaling pathway; antifungal humoral response (sensu Invertebrata); cytoplasm; defense response; dorsal/ventral axis specification; plasma membrane; protein amino acid phosphorylation; protein kinase activity; protein serine/threonine kinase activity; protein-nucleus import; response to fungi; zygotic determination of dorsal/ventral axis |
| CG1102                                       |        |       | -1.222 | 1.297 | defense response; monophenol monooxygenase activator activity; proteolysis and peptidolysis; serine-type endopeptidase activity; trypsin activity                                                                                                                                                                                                       |
| Peptidoglycan recognition protein LA         |        |       | -1.131 | 1.294 | defense response; immune response; integral to membrane; integral to plasma membrane; peptidoglycan recognition activity; perception of bacteria                                                                                                                                                                                                        |
|                                              |        |       |        |       |                                                                                                                                                                                                                                                                                                                                                         |
| <b>Chaperone activity/heat shock protein</b> |        |       |        |       |                                                                                                                                                                                                                                                                                                                                                         |
| Hsp70/Hsp90 organizing protein homolog       | -1.019 | 1.457 |        |       | Hsp70/Hsp90 organizing protein activity; chaperone activity                                                                                                                                                                                                                                                                                             |
| CG7409                                       | -0.987 | 1.556 |        |       | chaperone activity                                                                                                                                                                                                                                                                                                                                      |
| CaBP1                                        | -0.951 | 1.622 |        |       | protein disulfide isomerase activity                                                                                                                                                                                                                                                                                                                    |
| CG4164                                       | -0.911 | 1.505 |        |       | heat shock protein activity                                                                                                                                                                                                                                                                                                                             |
| Heat shock protein 83                        | -0.842 | 1.812 |        |       | centrosome; centrosome cycle; chaperone activity; chaperonin ATPase activity; cytoplasm; determination of anterior/posterior axis, embryo; heat shock protein activity; protein folding; regulation of sleep; response to heat; spermatogenesis; torso signaling pathway                                                                                |
| Hsc70Cb                                      | -0.720 | 1.551 |        |       | co-chaperone activity; protein folding                                                                                                                                                                                                                                                                                                                  |
| CG7033                                       | -0.710 | 1.361 |        |       | chaperone activity; chaperonin-containing T-complex                                                                                                                                                                                                                                                                                                     |
| Glycoprotein 93                              | -0.679 | 1.360 |        |       | chaperone activity                                                                                                                                                                                                                                                                                                                                      |
| T-complex Chaperonin 5                       |        |       | -1.309 | 1.304 | chaperonin ATPase activity; chaperonin-containing T-complex; protein folding                                                                                                                                                                                                                                                                            |
| CG5525                                       |        |       | -1.150 | 1.218 | chaperonin ATPase activity; chaperonin-containing T-complex                                                                                                                                                                                                                                                                                             |
|                                              |        |       |        |       |                                                                                                                                                                                                                                                                                                                                                         |
| <b>Redox</b>                                 |        |       |        |       |                                                                                                                                                                                                                                                                                                                                                         |
| Nmdmc                                        | -1.702 | 2.382 |        |       | NAD-dependent methylenetetrahydrofolate dehydrogenase; 10-formyltetrahydrofolate metabolism; carbohydrate metabolism; magnesium ion binding; methenyltetrahydrofolate cyclohydrolase activity; methylenetetrahydrofolate dehydrogenase (NAD) activity; methylenetetrahydrofolate dehydrogenase (NADP) activity; mitochondrion                           |
| CG17524                                      | -1.667 | 2.020 |        |       | glutathione transferase activity                                                                                                                                                                                                                                                                                                                        |
| CG17530                                      | -0.921 | 1.495 |        |       | glutathione transferase activity                                                                                                                                                                                                                                                                                                                        |
| CG6776                                       | -0.860 | 1.454 |        |       | glutathione transferase activity                                                                                                                                                                                                                                                                                                                        |
| CG9360                                       | -0.852 | 1.361 | -1.956 | 1.611 | oxidoreductase activity, acting on CH-OH group of donors                                                                                                                                                                                                                                                                                                |
| CG17523                                      | -0.829 | 1.397 |        |       | glutathione transferase activity                                                                                                                                                                                                                                                                                                                        |
| Glutathione S transferase D3                 | -0.827 | 1.530 |        |       | cellular_component unknown; glutathione conjugation reaction; glutathione transferase activity                                                                                                                                                                                                                                                          |
| Ero1L                                        | -0.777 | 1.516 |        |       | oxidoreductase activity                                                                                                                                                                                                                                                                                                                                 |
| CG6020                                       | -0.726 | 1.325 |        |       | NADH dehydrogenase (ubiquinone) activity; NADH dehydrogenase activity; mitochondrial electron transport, NADH to ubiquinone; respiratory chain complex I (sensu Eukarya)                                                                                                                                                                                |

|                                                  |        |       |        |       |                                                                                                                                                                                                             |
|--------------------------------------------------|--------|-------|--------|-------|-------------------------------------------------------------------------------------------------------------------------------------------------------------------------------------------------------------|
| Glutathione S transferase E1                     | -0.709 | 1.320 |        |       | glutathione transferase activity; response to oxidative stress                                                                                                                                              |
| CG12203                                          | -0.701 | 1.341 |        |       | NADH dehydrogenase (ubiquinone) activity; NADH dehydrogenase activity; mitochondrial electron transport, NADH to ubiquinone; respiratory chain complex I (sensu Eukarya)                                    |
| Photoreceptor dehydrogenase                      | -0.697 | 1.392 |        |       | oxidoreductase activity, acting on the CH-OH group of donors, NAD or NADP as acceptor                                                                                                                       |
| CG12013                                          | -0.673 | 1.307 |        |       | cytoplasm; glutathione peroxidase activity; mitochondrion; response to lipid hydroperoxide                                                                                                                  |
| Gst3-1                                           | -0.663 | 1.324 |        |       | glutathione transferase activity; response to toxin                                                                                                                                                         |
| CG4169                                           | -0.661 | 1.318 |        |       | mitochondrial electron transport, ubiquinol to cytochrome c; ubiquinol-cytochrome-c reductase activity; ubiquinol-cytochrome-c reductase complex (sensu Eukarya)                                            |
| CG1970                                           | -0.647 | 1.412 |        |       | NADH dehydrogenase (ubiquinone) activity; NADH dehydrogenase activity; mitochondrial electron transport, NADH to ubiquinone; respiratory chain complex I (sensu Eukarya)                                    |
| CG11455                                          | -0.642 | 1.330 |        |       | NADH dehydrogenase activity; mitochondrial electron transport, NADH to ubiquinone; respiratory chain complex I (sensu Eukarya)                                                                              |
| CG7712                                           | -0.640 | 1.313 |        |       | NADH dehydrogenase (ubiquinone) activity; NADH dehydrogenase activity; mitochondrial electron transport, NADH to ubiquinone; respiratory chain complex I (sensu Eukarya)                                    |
| CG9027                                           | -0.637 | 1.278 |        |       | superoxide dismutase activity                                                                                                                                                                               |
| CG9140                                           | -0.634 | 1.361 |        |       | NADH dehydrogenase (ubiquinone) activity; NADH dehydrogenase activity; mitochondrial electron transport, NADH to ubiquinone; respiratory chain complex I (sensu Eukarya)                                    |
| Glutathione S transferase S1                     | -0.629 | 1.478 |        |       | cellular component unknown; glutathione conjugation reaction; glutathione peroxidase activity; glutathione transferase activity; response to oxidative stress                                               |
| NADH:ubiquinone reductase 23kD subunit precursor | -0.625 | 1.293 |        |       | NADH dehydrogenase (ubiquinone) activity; NADH dehydrogenase activity; mitochondrial electron transport, NADH to ubiquinone; respiratory chain complex I (sensu Eukarya)                                    |
| Superoxide dismutase 2 (Mn)                      | -0.623 | 1.271 |        |       | antioxidant activity; determination of adult life span; manganese superoxide dismutase activity; mitochondrial matrix; removal of superoxide radicals; superoxide dismutase activity; superoxide metabolism |
| CG5548                                           | -0.616 | 1.304 |        |       | NADH dehydrogenase (ubiquinone) activity; NADH dehydrogenase activity; mitochondrial electron transport, NADH to ubiquinone; respiratory chain complex I (sensu Eukarya)                                    |
| CG5590                                           | -0.612 | 1.318 |        |       | oxidoreductase activity, acting on the CH-OH group of donors, NAD or NADP as acceptor                                                                                                                       |
| Glutathione S transferase D2                     |        |       | -1.592 | 1.413 | glutathione conjugation reaction; glutathione peroxidase activity; glutathione transferase activity                                                                                                         |
| CG9436                                           |        |       | -1.523 | 1.361 | aldehyde reductase activity                                                                                                                                                                                 |
| CG2254                                           |        |       | -1.453 | 1.294 | oxidoreductase activity                                                                                                                                                                                     |
| CG17531                                          |        |       | -1.233 | 1.275 | glutathione transferase activity                                                                                                                                                                            |
| CG4670                                           |        |       | -1.141 | 1.316 | flavin-linked sulfhydryl oxidase activity                                                                                                                                                                   |
| <b>Cytochrome P450</b>                           |        |       |        |       |                                                                                                                                                                                                             |
| Cyp6w1                                           | -1.034 | 1.741 | -1.654 | 1.527 | cytochrome P450 activity; membrane; microsome                                                                                                                                                               |
| Cyp6g1                                           | -1.022 | 1.643 | -1.159 | 1.232 | Resistance to DDT; cytochrome P450 activity; membrane; microsome; response to DDT                                                                                                                           |
| Cytochrome P450-4p1                              | -0.931 | 1.656 |        |       | cytochrome P450 activity; membrane; microsome                                                                                                                                                               |
| Cytochrome P450-4e2                              | -0.775 | 1.413 |        |       | cytochrome P450 activity; membrane; microsome                                                                                                                                                               |
| Cytochrome c oxidase subunit Va                  | -0.750 | 1.361 |        |       | cytochrome-c oxidase activity; electron transport; mitochondrial electron transport, cytochrome c to oxygen; mitochondrial inner membrane; respiratory chain complex IV (sensu Eukarya)                     |
| Cyp6a13                                          | -0.722 | 1.406 |        |       | cytochrome P450 activity; membrane; microsome                                                                                                                                                               |
| Cytochrome P450-6a2                              | -0.644 | 1.602 | -1.129 | 1.288 | cytochrome P450 activity; membrane; microsome; response to insecticide                                                                                                                                      |

|                                              |        |       |        |       |                                                                                                                                                                                                                                                                                                                                                        |
|----------------------------------------------|--------|-------|--------|-------|--------------------------------------------------------------------------------------------------------------------------------------------------------------------------------------------------------------------------------------------------------------------------------------------------------------------------------------------------------|
| CG14235                                      | -0.641 | 1.293 |        |       | cytochrome-c oxidase activity; respiratory chain complex IV (sensu Eukarya)                                                                                                                                                                                                                                                                            |
| <b>Signaling molecules</b>                   |        |       |        |       |                                                                                                                                                                                                                                                                                                                                                        |
| <b>GTP binding; GTPase activity</b>          |        |       |        |       |                                                                                                                                                                                                                                                                                                                                                        |
| Rac2                                         | -0.741 | 1.486 |        |       | Rho small monomeric GTPase activity; dorsal closure; morphogenesis of an epithelium; myoblast fusion; oocyte microtubule cytoskeleton polarization; pole plasm oskar mRNA localization; protein localization; rhabdomere development; small monomeric GTPase activity; tracheal outgrowth (sensu Insecta); tracheal system development (sensu Insecta) |
| Rab-protein 7                                | -0.730 | 1.321 |        |       | RAB small monomeric GTPase activity; Rho small monomeric GTPase activity; endosome to lysosome transport; endosome transport; late endosome                                                                                                                                                                                                            |
| CG7197                                       | -0.700 | 1.338 |        |       | ARF small monomeric GTPase activity                                                                                                                                                                                                                                                                                                                    |
| Rab-protein 14                               | -0.630 | 1.300 |        |       | GTP binding; RAB small monomeric GTPase activity; Rho small monomeric GTPase activity                                                                                                                                                                                                                                                                  |
| Septin-2                                     | -0.611 | 1.328 |        |       | GTP binding; GTPase activity; cellularization; cytokinesis; ring canal (sensu Drosophila); septin ring                                                                                                                                                                                                                                                 |
| CG7891                                       |        |       | -1.217 | 1.295 | ARF small monomeric GTPase activity                                                                                                                                                                                                                                                                                                                    |
| Rab-protein 10                               |        |       | -1.137 | 1.412 | RAB small monomeric GTPase activity; Rho small monomeric GTPase activity                                                                                                                                                                                                                                                                               |
| <b>G-Protein receptor/signaling</b>          |        |       |        |       |                                                                                                                                                                                                                                                                                                                                                        |
| Drosulfakinin                                | -0.639 | 1.356 |        |       | neuropeptide hormone activity; neuropeptide receptor activity; neuropeptide signaling pathway                                                                                                                                                                                                                                                          |
| CG12290                                      | -0.611 | 1.265 |        |       | G-protein coupled receptor activity, unknown ligand; G-protein coupled receptor protein signaling pathway; integral to membrane                                                                                                                                                                                                                        |
| CG18314                                      |        |       | -1.552 | 1.442 | G-protein coupled receptor protein signaling pathway; amine receptor activity; integral to membrane                                                                                                                                                                                                                                                    |
| kurtz                                        |        |       | -1.380 | 1.340 | G-protein coupled receptor signaling; endocytosis; intracellular protein transport; sensory perception                                                                                                                                                                                                                                                 |
| CG12876                                      |        |       | -1.379 | 1.329 | signal transducer activity                                                                                                                                                                                                                                                                                                                             |
| Trehalose receptor 1                         |        |       | -1.374 | 1.274 | G-protein coupled receptor activity, unknown ligand; G-protein coupled receptor protein signaling pathway; integral to membrane; sweet taste perception; taste; taste receptor activity                                                                                                                                                                |
| mthl2                                        |        |       | -1.305 | 1.336 | G-protein coupled receptor activity; G-protein coupled receptor protein signaling pathway; determination of adult life span; integral to membrane; response to stress                                                                                                                                                                                  |
| <b>Neurotransmitter synthesis/metabolism</b> |        |       |        |       |                                                                                                                                                                                                                                                                                                                                                        |
| adenosine 3                                  | -0.846 | 1.574 |        |       | 'de novo' IMP biosynthesis; phosphoribosylamine-glycine ligase activity; phosphoribosylformylglycinamide cyclo-ligase activity; phosphoribosylglycinamide formyltransferase activity                                                                                                                                                                   |
| adenosine 2                                  | -0.799 | 1.704 | -1.316 | 1.387 | 'de novo' IMP biosynthesis; phosphoribosylformylglycinamide synthase activity                                                                                                                                                                                                                                                                          |
| CG11089                                      | -0.689 | 1.480 |        |       | IMP cyclohydrolase activity; phosphoribosylaminoimidazolecarboxamide formyltransferase activity                                                                                                                                                                                                                                                        |
| black                                        | -0.680 | 1.444 |        |       | aspartate 1-decarboxylase activity; glutamate decarboxylase activity                                                                                                                                                                                                                                                                                   |
| ebony                                        | -0.676 | 1.542 |        |       | beta-alanyl-dopamine synthase activity; circadian rhythm; cuticle pigmentation; cuticle tanning; dopamine metabolism; locomotor rhythm; negative regulation of melanin biosynthesis; pigment metabolism                                                                                                                                                |

|                                      |        |       |        |       |                                                                                                                                                                                                                                                                                                                                                                                                                                                                                                                                                                                                                                   |
|--------------------------------------|--------|-------|--------|-------|-----------------------------------------------------------------------------------------------------------------------------------------------------------------------------------------------------------------------------------------------------------------------------------------------------------------------------------------------------------------------------------------------------------------------------------------------------------------------------------------------------------------------------------------------------------------------------------------------------------------------------------|
| Dopa decarboxylase                   |        |       | -2.223 | 2.285 | aromatic-L-amino-acid decarboxylase activity; catecholamine metabolism; courtship behavior; cuticle biosynthesis; dopamine biosynthesis from tyrosine; eclosion rhythm; learning and/or memory; melanin biosynthesis; serotonin biosynthesis from tryptophan                                                                                                                                                                                                                                                                                                                                                                      |
| <b>phosphatase activity</b>          |        |       |        |       |                                                                                                                                                                                                                                                                                                                                                                                                                                                                                                                                                                                                                                   |
| astray                               | -1.303 | 1.861 | -2.677 | 1.643 | L-serine biosynthesis; axon guidance; peripheral nervous system development; phosphoserine phosphatase activity                                                                                                                                                                                                                                                                                                                                                                                                                                                                                                                   |
| wunen                                | -0.623 | 1.317 |        |       | dephosphorylation; germ-cell migration; integral to membrane; negative regulation of cell migration; phosphatidate phosphatase activity; plasma membrane                                                                                                                                                                                                                                                                                                                                                                                                                                                                          |
| puckered                             |        |       | -1.398 | 1.447 | JNK cascade; JUN kinase phosphatase activity; MAP kinase phosphatase activity; actin cytoskeleton organization and biogenesis; dorsal appendage formation; dorsal closure; epidermal differentiation; establishment of planar polarity; micropyle formation; negative regulation of JNK cascade; ommatidial rotation; ovarian follicle cell development (sensu Insecta); peripheral nervous system development; phosphoprotein phosphatase activity; protein amino acid dephosphorylation; protein tyrosine/serine/threonine phosphatase activity; protein-tyrosine-phosphatase activity; suture of dorsal opening; wound healing |
| CG11425                              |        |       | -1.222 | 1.408 | dephosphorylation; phosphatidate phosphatase activity                                                                                                                                                                                                                                                                                                                                                                                                                                                                                                                                                                             |
| retinal degeneration C               |        |       | -1.158 | 1.393 | calcium-dependent protein serine/threonine phosphatase activity; calcium-mediated signaling; calmodulin binding; deactivation of rhodopsin mediated signaling; photoreceptor maintenance; phototransduction; protein amino acid dephosphorylation; protein serine/threonine phosphatase activity; vision                                                                                                                                                                                                                                                                                                                          |
| <b>kinase activity</b>               |        |       |        |       |                                                                                                                                                                                                                                                                                                                                                                                                                                                                                                                                                                                                                                   |
| CG8286                               | -1.110 | 1.834 |        |       | protein kinase inhibitor activity                                                                                                                                                                                                                                                                                                                                                                                                                                                                                                                                                                                                 |
| Inositol 1,4,5-triphosphate kinase 2 | -1.016 | 1.957 | -1.143 | 1.367 | inositol-trisphosphate 3-kinase activity                                                                                                                                                                                                                                                                                                                                                                                                                                                                                                                                                                                          |
| CG3001                               | -1.000 | 1.554 |        |       | hexokinase-A                                                                                                                                                                                                                                                                                                                                                                                                                                                                                                                                                                                                                      |
| CG5288                               | -0.955 | 1.590 |        |       | galactokinase activity                                                                                                                                                                                                                                                                                                                                                                                                                                                                                                                                                                                                            |
| CG8057                               | -0.708 | 1.345 |        |       | SNF1A/AMP-activated protein kinase activity                                                                                                                                                                                                                                                                                                                                                                                                                                                                                                                                                                                       |
| CG17090                              | -0.703 | 1.571 |        |       | protein amino acid phosphorylation; protein kinase activity; protein serine/threonine kinase activity                                                                                                                                                                                                                                                                                                                                                                                                                                                                                                                             |
| Ecdysone-induced protein 63E         | -0.686 | 1.576 |        |       | cyclin-dependent protein kinase activity; protein amino acid phosphorylation; protein serine/threonine kinase activity                                                                                                                                                                                                                                                                                                                                                                                                                                                                                                            |
| Ady43A                               |        |       | -3.466 | 2.468 | adenosine kinase activity                                                                                                                                                                                                                                                                                                                                                                                                                                                                                                                                                                                                         |
| Slob                                 |        |       | -2.585 | 1.726 | protein kinase activity                                                                                                                                                                                                                                                                                                                                                                                                                                                                                                                                                                                                           |
| Glycerol kinase                      |        |       | -1.663 | 1.544 | glycerol kinase activity                                                                                                                                                                                                                                                                                                                                                                                                                                                                                                                                                                                                          |
| fumble                               |        |       | -1.447 | 1.406 | chromosome segregation; cytokinesis; cytoplasm; meiosis; membrane organization and biogenesis; mitosis; pantothenate kinase activity; plasma membrane; spermatogenesis; spindle                                                                                                                                                                                                                                                                                                                                                                                                                                                   |
| Fak-like tyrosine kinase (PR2)       |        |       | -1.414 | 1.204 | cellular_component unknown; non-membrane spanning protein tyrosine kinase activity; protein amino acid phosphorylation; protein-tyrosine kinase activity                                                                                                                                                                                                                                                                                                                                                                                                                                                                          |
| Longevity assurance gene 1           |        |       | -1.343 | 1.299 | plasma membrane, ser/thr kinase activity                                                                                                                                                                                                                                                                                                                                                                                                                                                                                                                                                                                          |
| skiff                                |        |       | -1.277 | 1.247 | guanylate kinase activity; plasma membrane                                                                                                                                                                                                                                                                                                                                                                                                                                                                                                                                                                                        |
| <b>Calcium ion-binding</b>           |        |       |        |       |                                                                                                                                                                                                                                                                                                                                                                                                                                                                                                                                                                                                                                   |
| TpnC4                                | -0.801 | 2.319 |        |       | calcium ion binding                                                                                                                                                                                                                                                                                                                                                                                                                                                                                                                                                                                                               |
| Putative Achaete Scute Target 1      | -0.753 | 1.414 |        |       | calcium ion binding; endocytosis                                                                                                                                                                                                                                                                                                                                                                                                                                                                                                                                                                                                  |
| Calreticulin                         | -0.706 | 1.408 |        |       | calcium ion binding; central nervous system development; endoplasmic reticulum lumen; peripheral nervous system development                                                                                                                                                                                                                                                                                                                                                                                                                                                                                                       |

|                                          |        |       |        |       |                                                                                                                                                                                                                                                                                                                                                                                                                                                                                                           |
|------------------------------------------|--------|-------|--------|-------|-----------------------------------------------------------------------------------------------------------------------------------------------------------------------------------------------------------------------------------------------------------------------------------------------------------------------------------------------------------------------------------------------------------------------------------------------------------------------------------------------------------|
| inactivation no afterpotential D         | -0.678 | 1.471 |        |       | calmodulin binding; deactivation of rhodopsin mediated signaling; inaD signaling complex; myosin binding; phototransduction; protein localization; receptor signaling complex scaffold activity; rhabdomere; structural molecule activity                                                                                                                                                                                                                                                                 |
| CG9297                                   | -0.672 | 1.449 |        |       | calcium ion binding; calcium ion transport                                                                                                                                                                                                                                                                                                                                                                                                                                                                |
| CG10126                                  | -0.644 | 1.402 |        |       | calcium ion binding                                                                                                                                                                                                                                                                                                                                                                                                                                                                                       |
| Myosin alkali light chain 1              | -0.618 | 1.403 |        |       | calcium ion binding; muscle contraction; muscle motor activity; muscle myosin; myosin; myosin ATPase activity                                                                                                                                                                                                                                                                                                                                                                                             |
| Senescence marker protein-30             |        |       | -1.326 | 1.438 | calcium ion binding                                                                                                                                                                                                                                                                                                                                                                                                                                                                                       |
| aralar1                                  |        |       | -1.314 | 1.310 | calcium ion binding; carrier activity; integral to membrane; mitochondrial inner membrane; mitochondrial membrane; mitochondrial transport; transport                                                                                                                                                                                                                                                                                                                                                     |
| regucalcin                               |        |       | -1.139 | 1.285 | calcium ion binding                                                                                                                                                                                                                                                                                                                                                                                                                                                                                       |
| <b>Cell-cell signaling and hormone</b>   |        |       |        |       |                                                                                                                                                                                                                                                                                                                                                                                                                                                                                                           |
| Juvenile hormone epoxide hydrolase 2     | -0.865 | 1.469 | -1.124 | 1.246 | epoxide hydrolase activity; juvenile hormone catabolism; juvenile hormone epoxide hydrolase activity; microsome                                                                                                                                                                                                                                                                                                                                                                                           |
| Juvenile hormone epoxide hydrolase 1     | -0.861 | 1.485 | -1.618 | 1.335 | epoxide hydrolase activity; juvenile hormone catabolism; juvenile hormone epoxide hydrolase activity                                                                                                                                                                                                                                                                                                                                                                                                      |
| Tetraspanin 42Ef                         | -0.780 | 1.322 |        |       | integral to membrane                                                                                                                                                                                                                                                                                                                                                                                                                                                                                      |
| Tetraspanin 42Eg                         | -0.762 | 1.373 |        |       | integral to membrane                                                                                                                                                                                                                                                                                                                                                                                                                                                                                      |
| Activin Like Protein at 23B              | -0.731 | 1.458 |        |       | transforming growth factor-beta receptor binding                                                                                                                                                                                                                                                                                                                                                                                                                                                          |
| Neuroglian                               | -0.685 | 1.390 |        |       | EGF receptor signaling pathway; cell adhesion molecule activity; central complex development; lateral plasma membrane; mushroom body development; neuronal cell adhesion; plasma membrane                                                                                                                                                                                                                                                                                                                 |
| Keren                                    | -0.612 | 1.246 |        |       | EGF receptor signaling pathway; MAPKKK cascade; epidermal growth factor receptor binding; growth factor activity; plasma membrane; positive regulation of EGF receptor activity                                                                                                                                                                                                                                                                                                                           |
| Imaginal disc growth factor 1            |        |       | -1.764 | 1.469 | chitinase activity; extracellular; imaginal disc growth factor activity                                                                                                                                                                                                                                                                                                                                                                                                                                   |
| Esterase 6                               |        |       | -1.415 | 1.372 | carboxylesterase activity; courtship behavior; pheromone biosynthesis; regulation of female receptivity, post-mating; sexual reproduction                                                                                                                                                                                                                                                                                                                                                                 |
| <b>Synaptic vesicle</b>                  |        |       |        |       |                                                                                                                                                                                                                                                                                                                                                                                                                                                                                                           |
| Syntaxin 5                               | -0.741 | 1.407 |        |       | Golgi apparatus; cytokinesis; neurotransmitter secretion; plasma membrane; synaptic vesicle docking; synaptic vesicle fusion; t-SNARE activity                                                                                                                                                                                                                                                                                                                                                            |
| gammaSnap                                | -0.686 | 1.308 |        |       | gamma-soluble NSF attachment protein; cytoplasm; neurotransmitter secretion; soluble NSF attachment protein activity; synaptic vesicle priming                                                                                                                                                                                                                                                                                                                                                            |
| Scamp                                    | -0.609 | 1.306 | -1.157 | 1.206 | synaptic vesicle; synaptic vesicle exocytosis                                                                                                                                                                                                                                                                                                                                                                                                                                                             |
| CG11857                                  |        |       | -1.182 | 1.356 | vesicle-mediated transport                                                                                                                                                                                                                                                                                                                                                                                                                                                                                |
| <b>Transcription factor/ DNA binding</b> |        |       |        |       |                                                                                                                                                                                                                                                                                                                                                                                                                                                                                                           |
| Clock                                    | -0.870 | 1.393 |        |       |                                                                                                                                                                                                                                                                                                                                                                                                                                                                                                           |
| anterior open                            | -0.825 | 1.388 |        |       | JNK cascade; MAPKKK cascade; R7 development; cell fate determination; dorsal closure; induction of apoptosis; negative regulation of RAS protein signal transduction; negative regulation of cell differentiation; negative regulation of eye photoreceptor development (sensu Drosophila); negative regulation of photoreceptor differentiation (sensu Drosophila); nucleus; specific RNA polymerase II transcription factor activity; transcription factor activity; transcriptional repressor activity |
| Tis11 homolog                            | -0.747 | 1.611 |        |       | DNA binding; nucleus                                                                                                                                                                                                                                                                                                                                                                                                                                                                                      |

|                                  |        |       |        |       |                                                                                                                                                                                                                                                                                                                                                                                                                                                                                                                                                                                                                                                               |
|----------------------------------|--------|-------|--------|-------|---------------------------------------------------------------------------------------------------------------------------------------------------------------------------------------------------------------------------------------------------------------------------------------------------------------------------------------------------------------------------------------------------------------------------------------------------------------------------------------------------------------------------------------------------------------------------------------------------------------------------------------------------------------|
| Elongin C                        | -0.701 | 1.331 |        |       | transcription elongation factor complex; transcriptional elongation regulator activity                                                                                                                                                                                                                                                                                                                                                                                                                                                                                                                                                                        |
| Jun-related antigen              | -0.695 | 1.334 | -1.893 | 1.424 | JNK cascade; MAPKKK cascade; R3/R4 cell fate commitment; R7 cell fate commitment; RNA polymerase II transcription factor activity; cytoplasm; dorsal appendage formation; dorsal closure; establishment of planar polarity; micropyle formation; nucleus; protein heterodimerization activity; regulation of transcription from Pol II promoter; specific RNA polymerase II transcription factor activity; transcription factor binding                                                                                                                                                                                                                       |
| boule                            | -0.674 | 1.301 |        |       | RNA binding; entry into meiosis; male meiosis; meiotic G2/M1 transition; nucleus; regulation of translation; spermatogenesis                                                                                                                                                                                                                                                                                                                                                                                                                                                                                                                                  |
| staufer                          | -0.654 | 1.327 |        |       | RNA binding; RNA localization; apical cortex; basal cortex; bicoid mRNA localization; cell cortex; double-stranded RNA binding; female gamete generation; long-term memory; mRNA 3' UTR binding; mRNA localization, intracellular; microtubule associated complex; microtubule binding; microtubule-based process; neuroblast cell division; pole plasm RNA localization; pole plasm assembly; pole plasm mRNA localization; pole plasm oskar mRNA localization; pole plasm protein localization; positive regulation of oskar mRNA translation; protein localization; regulation of oskar mRNA translation; regulation of pole plasm oskar mRNA localization |
| CG5735                           | -0.654 | 1.349 |        |       | RNA binding                                                                                                                                                                                                                                                                                                                                                                                                                                                                                                                                                                                                                                                   |
| stripe                           | -0.629 | 1.469 |        |       | RNA polymerase II transcription factor activity; central nervous system development; determination of muscle attachment site; muscle development; nucleus; pigment metabolism; tracheal cell migration (sensu Insecta)                                                                                                                                                                                                                                                                                                                                                                                                                                        |
| CG17836                          | -0.610 | 1.409 |        |       | protein dimerization activity, transcription factor                                                                                                                                                                                                                                                                                                                                                                                                                                                                                                                                                                                                           |
| vrille                           |        |       | -2.118 | 1.721 | RNA polymerase II transcription factor activity; circadian rhythm; development; locomotor rhythm; nucleus; protein heterodimerization activity; protein homodimerization activity; rhythmic behavior; transcription regulator activity; transcription, DNA-dependent                                                                                                                                                                                                                                                                                                                                                                                          |
| similar to Deadpan               |        |       | -1.942 | 1.411 | nucleus; regulation of transcription; transcription factor activity                                                                                                                                                                                                                                                                                                                                                                                                                                                                                                                                                                                           |
| hairy                            |        |       | -1.781 | 1.518 | bristle morphogenesis; general transcriptional repressor activity; membrane organization and biogenesis; negative regulation of transcription; negative regulation of transcription from Pol II promoter; negative regulation of transcription, DNA-dependent; nucleus; periodic partitioning by pair rule gene; restriction of R8 fate; salivary gland development; salivary gland morphogenesis; specific RNA polymerase II transcription factor activity; specific transcriptional repressor activity                                                                                                                                                      |
| modulator of the activity of Ets |        |       | -1.585 | 1.213 | embryonic pattern specification; protein binding; regulation of EGF receptor signaling pathway; regulation of RAS protein signal transduction; regulation of phosphorylation; regulation of transcription, DNA-dependent                                                                                                                                                                                                                                                                                                                                                                                                                                      |
| nocturnin                        |        |       | -1.550 | 1.354 | nucleic acid binding                                                                                                                                                                                                                                                                                                                                                                                                                                                                                                                                                                                                                                          |
| Tif-1A                           |        |       | -1.444 | 1.471 | DNA-directed RNA polymerase I complex; RNA polymerase I transcription factor activity; regulation of transcription from Pol I promoter                                                                                                                                                                                                                                                                                                                                                                                                                                                                                                                        |
| timeless                         |        |       | -1.417 | 1.636 | circadian rhythm; cytoplasm; eclosion rhythm; entrainment of circadian clock; locomotor rhythm; mating behavior; negative regulation of transcription from Pol II promoter; nucleus; protein binding; protein-nucleus import; regulation of sleep; rhythmic behavior; sleep                                                                                                                                                                                                                                                                                                                                                                                   |
| CG30420                          |        |       | -1.406 | 1.397 | protein homodimerization activity, transcription factor                                                                                                                                                                                                                                                                                                                                                                                                                                                                                                                                                                                                       |

|                              |        |       |        |       |                                                                                                                                                                                                                                                                                                                                                                                                                                                                              |
|------------------------------|--------|-------|--------|-------|------------------------------------------------------------------------------------------------------------------------------------------------------------------------------------------------------------------------------------------------------------------------------------------------------------------------------------------------------------------------------------------------------------------------------------------------------------------------------|
| fruitless                    |        |       | -1.379 | 1.215 | RNA polymerase II transcription factor activity; central nervous system development; copulation; male courtship behavior; male courtship behavior (sensu Insecta); male courtship behavior (sensu Insecta), orientation; male courtship behavior (sensu Insecta), song production; male courtship behavior (sensu Insecta), wing vibration; male sex differentiation; mating; mating behavior, sex discrimination; nucleus; sex determination; transcription factor activity |
| Fibrillarin                  |        |       | -1.371 | 1.323 | 35S primary transcript processing; small nuclear ribonucleoprotein complex; small nucleolar ribonucleoprotein complex                                                                                                                                                                                                                                                                                                                                                        |
| MTF-1                        |        |       | -1.267 | 1.427 | metal ion homeostasis; nucleoplasm; nucleus; specific RNA polymerase II transcription factor activity; transcription; transcription factor activity                                                                                                                                                                                                                                                                                                                          |
| CG11761                      |        |       | -1.264 | 1.262 | DNA binding                                                                                                                                                                                                                                                                                                                                                                                                                                                                  |
| drop                         |        |       | -1.194 | 1.434 | dorsal/ventral pattern formation; dorsal/ventral pattern formation, imaginal disc; muscle development; neuroblast cell fate determination; neurogenesis; nucleus; regulation of cell fate; regulation of transcription; specific RNA polymerase II transcription factor activity; ventral cord development; wing morphogenesis                                                                                                                                               |
| CG5603                       |        |       | -1.158 | 1.372 | nucleus; transcription factor activity                                                                                                                                                                                                                                                                                                                                                                                                                                       |
| cycle                        |        |       | -1.137 | 1.265 | RNA polymerase II transcription factor activity; behavioral response to cocaine; circadian rhythm; eclosion rhythm; locomotor rhythm; nucleus; positive regulation of transcription from Pol II promoter; positive regulation of transcription, DNA-dependent; regulation of sleep; rhythmic behavior; specific RNA polymerase II transcription factor activity                                                                                                              |
| <b>Cytoskeletal proteins</b> |        |       |        |       |                                                                                                                                                                                                                                                                                                                                                                                                                                                                              |
| Actin 88F                    | -0.967 | 2.145 |        |       | actin filament; cytoskeleton organization and biogenesis; structural constituent of cytoskeleton                                                                                                                                                                                                                                                                                                                                                                             |
| Myosin 31DF                  | -0.916 | 1.847 |        |       | actin binding; cytoplasm; motor activity; myosin; myosin ATPase activity                                                                                                                                                                                                                                                                                                                                                                                                     |
| upheld                       | -0.909 | 1.546 |        |       | tropomyosin binding; troponin complex                                                                                                                                                                                                                                                                                                                                                                                                                                        |
| Protein ejaculatory bulb     | -0.847 | 2.210 |        |       | extracellular; post-mating behavior; structural molecule activity                                                                                                                                                                                                                                                                                                                                                                                                            |
| flightin                     | -0.835 | 2.112 |        |       | muscle fiber; striated muscle thick filament                                                                                                                                                                                                                                                                                                                                                                                                                                 |
| Actin 79B                    | -0.826 | 1.627 |        |       | actin filament; cytoskeleton organization and biogenesis; structural constituent of cytoskeleton                                                                                                                                                                                                                                                                                                                                                                             |
| BM-40-SPARC                  | -0.659 | 1.301 |        |       | basement membrane; cell adhesion; extracellular matrix                                                                                                                                                                                                                                                                                                                                                                                                                       |
| Yolk protein 2               | -0.655 | 1.390 |        |       | female gamete generation; sex differentiation; structural molecule activity; vitellogenesis                                                                                                                                                                                                                                                                                                                                                                                  |
| CG8505                       | -0.654 | 1.552 |        |       | structural constituent of cuticle (sensu Insecta) activity                                                                                                                                                                                                                                                                                                                                                                                                                   |
| spire                        | -0.632 | 1.453 |        |       | actin binding; actin cytoskeleton organization and biogenesis; eggshell formation (sensu Insecta); female gamete generation; pole plasm RNA localization; pole plasm assembly; pole plasm assembly (sensu Insecta); pole plasm oskar mRNA localization                                                                                                                                                                                                                       |
| Tropomyosin 2                | -0.628 | 1.343 |        |       | actin binding; muscle thin filament tropomyosin; pole plasm assembly                                                                                                                                                                                                                                                                                                                                                                                                         |
| Actin 5C                     |        |       | -1.698 | 1.478 | actin filament; cytoskeleton organization and biogenesis; sperm individualization; structural constituent of cytoskeleton                                                                                                                                                                                                                                                                                                                                                    |
| CG31999                      |        |       | -1.291 | 1.469 | cell adhesion molecule activity; extracellular matrix                                                                                                                                                                                                                                                                                                                                                                                                                        |
| CG5869                       |        |       | -1.276 | 1.275 | actin binding; gliogenesis                                                                                                                                                                                                                                                                                                                                                                                                                                                   |
| CG5162                       |        |       | -1.257 | 1.211 | structural molecule activity                                                                                                                                                                                                                                                                                                                                                                                                                                                 |
| Actin 42A                    |        |       | -1.200 | 1.306 | actin filament; cytoskeleton organization and biogenesis; structural constituent of cytoskeleton                                                                                                                                                                                                                                                                                                                                                                             |



|                             |        |       |        |       |                                                                                                                                                                                                                                                                                                             |
|-----------------------------|--------|-------|--------|-------|-------------------------------------------------------------------------------------------------------------------------------------------------------------------------------------------------------------------------------------------------------------------------------------------------------------|
| Actin-related protein 66B   |        |       | -1.156 | 1.384 | Arp2/3 protein complex; actin binding; actin cytoskeleton; actin filament; cell cycle dependent actin filament reorganization; cytoskeleton organization and biogenesis; pseudocleavage (sensu Insecta); regulation of actin polymerization and/or depolymerization; structural constituent of cytoskeleton |
| BM-40-SPARC                 |        |       | -1.122 | 1.214 | basement membrane; cell adhesion; extracellular matrix                                                                                                                                                                                                                                                      |
| <b>Transporters</b>         |        |       |        |       |                                                                                                                                                                                                                                                                                                             |
| CG5002                      | -1.105 | 1.801 |        |       | high affinity sulfate permease activity, extra-cellular transport                                                                                                                                                                                                                                           |
| CG5853                      | -1.064 | 1.857 | -1.340 | 1.481 | ATP-binding cassette (ABC) transporter activity                                                                                                                                                                                                                                                             |
| CG3823                      | -0.947 | 1.515 |        |       | tocopherol binding                                                                                                                                                                                                                                                                                          |
| SRY interacting protein 1   | -0.829 | 1.471 | -1.134 | 1.290 | sodium:hydrogen antiporter regulator activity                                                                                                                                                                                                                                                               |
| CG32103                     | -0.763 | 1.404 |        |       | carrier activity; mitochondrial membrane; peroxisomal membrane; transport                                                                                                                                                                                                                                   |
| ATP synthase-beta           | -0.755 | 1.372 |        |       | hydrogen-exporting ATPase activity, phosphorylative mechanism; proton transport; proton-transporting ATP synthase complex, catalytic core F(1) (sensu Eukarya)                                                                                                                                              |
| Nckx30C                     | -0.731 | 1.496 |        |       | calcium ion transport; calcium, potassium:sodium antiporter activity; eye morphogenesis (sensu Drosophila); integral to membrane                                                                                                                                                                            |
| CG5802                      | -0.717 | 1.341 |        |       | UDP-galactose transporter activity                                                                                                                                                                                                                                                                          |
| CG31793                     | -0.699 | 1.329 |        |       | ATP-binding cassette (ABC) transporter activity; membrane; transport                                                                                                                                                                                                                                        |
| CG2930                      | -0.694 | 1.332 |        |       | transporter                                                                                                                                                                                                                                                                                                 |
| CG11984                     | -0.683 | 1.319 |        |       | potassium channel regulator activity                                                                                                                                                                                                                                                                        |
| porin                       | -0.675 | 1.291 |        |       | mitochondrial outer membrane; mitochondrial transport; voltage-dependent ion-selective channel activity                                                                                                                                                                                                     |
| CG15279                     | -0.674 | 1.433 |        |       | cation:amino acid symporter activity; neurotransmitter:sodium symporter activity                                                                                                                                                                                                                            |
| CG9281                      | -0.665 | 1.307 |        |       | ATP-binding cassette (ABC) transporter activity                                                                                                                                                                                                                                                             |
| Na/Ca-exchange protein      | -0.643 | 1.515 |        |       | calcium:sodium antiporter activity; plasma membrane                                                                                                                                                                                                                                                         |
| CG1746                      | -0.632 | 1.289 |        |       | hydrogen-exporting ATPase activity, phosphorylative mechanism; proton transport; proton-transporting ATP synthase complex, coupling factor F(o) (sensu Eukarya)                                                                                                                                             |
| CG9090                      | -0.630 | 1.346 |        |       | carrier activity; mitochondrial membrane; phosphate transport; phosphate transporter activity                                                                                                                                                                                                               |
| Multiple drug resistance 65 | -0.611 | 1.508 |        |       | integral to plasma membrane; multidrug transporter activity; xenobiotic-transporting ATPase activity                                                                                                                                                                                                        |
| CG1718                      | -0.610 | 1.346 |        |       | ATP-binding cassette (ABC) transporter activity                                                                                                                                                                                                                                                             |
| CG7966                      | -0.609 | 1.239 |        |       | selenium binding                                                                                                                                                                                                                                                                                            |
| Larval serum protein 2      |        |       | -2.553 | 1.623 | extracellular; larval serum protein complex; nutrient reservoir activity                                                                                                                                                                                                                                    |
| CG8468                      |        |       | -1.878 | 1.472 | monocarboxylate porter activity                                                                                                                                                                                                                                                                             |
| CG8026                      |        |       | -1.839 | 1.625 | carrier activity; folate transport; folate transporter activity; mitochondrial inner membrane; mitochondrial membrane; mitochondrial transport                                                                                                                                                              |
| Transferrin 3               |        |       | -1.755 | 2.345 | iron ion transporter activity; response to bacteria                                                                                                                                                                                                                                                         |
| Drip                        |        |       | -1.734 | 1.286 | integral to membrane; water channel activity; water homeostasis; water transport; water transporter activity                                                                                                                                                                                                |
| Larval serum protein 1 beta |        |       | -1.670 | 1.410 | extracellular; larval serum protein complex; nutrient reservoir activity                                                                                                                                                                                                                                    |
| CG13796                     |        |       | -1.533 | 1.389 | glycine transporter activity                                                                                                                                                                                                                                                                                |
| CG8062                      |        |       | -1.243 | 1.396 | monocarboxylic acid transporter activity                                                                                                                                                                                                                                                                    |
| Na pump alpha subunit       |        |       | -1.198 | 1.327 | cation transport; hydrolase activity, acting on acid anhydrides, catalyzing transmembrane movement of substances; plasma membrane; sodium/potassium-exchanging ATPase activity; sodium/potassium-exchanging ATPase complex                                                                                  |
| CG9717                      |        |       | -1.176 | 1.244 | high affinity sulfate permease activity, anion transport                                                                                                                                                                                                                                                    |

|                                            |        |       |        |       |                                                                                                                                    |
|--------------------------------------------|--------|-------|--------|-------|------------------------------------------------------------------------------------------------------------------------------------|
| CG5002                                     |        |       | -1.173 | 1.314 | high affinity sulfate permease activity                                                                                            |
| CG3091                                     |        |       | -1.122 | 1.214 | tocopherol binding                                                                                                                 |
| <b>Metabolism</b>                          |        |       |        |       |                                                                                                                                    |
| <b>Carbohydrate metabolism</b>             |        |       |        |       |                                                                                                                                    |
| UDP-glycosyltransferase 35b                | -1.713 | 2.252 |        |       | glucuronosyltransferase activity                                                                                                   |
| Glycerol kinase                            | -0.959 | 1.728 |        |       | glycerol kinase activity                                                                                                           |
| Transaldolase                              | -0.820 | 1.436 | -1.611 | 1.323 | cytoplasm; pentose-phosphate shunt, non-oxidative branch; transaldolase activity                                                   |
| CG7010                                     | -0.809 | 1.415 |        |       | pyruvate dehydrogenase (lipoamide) activity; pyruvate dehydrogenase complex; pyruvate metabolism                                   |
| CG32444                                    | -0.797 | 1.486 |        |       | aldose 1-epimerase activity                                                                                                        |
| Ugt86Da                                    | -0.762 | 1.487 |        |       | glucuronosyltransferase activity                                                                                                   |
| Larval visceral protein H                  | -0.726 | 1.702 |        |       | alpha-glucosidase activity; glucose metabolism                                                                                     |
| glycerol-3-phosphate dehydrogenase         | -0.713 | 1.353 |        |       | glycerol metabolism; glycerol-3-phosphate dehydrogenase activity; mitochondrion                                                    |
| CG6287                                     | -0.703 | 1.366 |        |       | phosphoglycerate dehydrogenase activity                                                                                            |
| CG1129                                     | -0.699 | 1.382 | -1.251 | 1.233 | mannose-1-phosphate guanylyltransferase activity                                                                                   |
| Phosphoglycerate kinase                    | -0.690 | 1.361 |        |       | cytoplasm; glycolysis; phosphoglycerate kinase activity                                                                            |
| CG5191                                     | -0.681 | 1.418 | -1.951 | 1.665 | glutamyl-tRNA(Gln) amidotransferase activity                                                                                       |
| fructose-1,6-bisphosphatase                | -0.674 | 1.382 |        |       | fructose-bisphosphatase activity                                                                                                   |
| Triose phosphate isomerase                 | -0.659 | 1.272 |        |       | triose-phosphate isomerase activity                                                                                                |
| Glyceraldehyde 3 phosphate dehydrogenase 2 | -0.653 | 1.317 |        |       | cytoplasm; glyceraldehyde-3-phosphate dehydrogenase (phosphorylating) activity; glycolysis                                         |
| Phosphoglyceromutase                       | -0.644 | 1.312 |        |       | phosphoglycerate mutase activity                                                                                                   |
| CG11876                                    | -0.638 | 1.283 |        |       | pyruvate dehydrogenase (lipoamide) activity; pyruvate dehydrogenase complex; pyruvate metabolism                                   |
| CG11909                                    |        |       | -3.589 | 2.014 | alpha-glucosidase activity; alpha-glucosidase complex                                                                              |
| Glycogen phosphorylase                     |        |       | -1.375 | 1.388 | carbohydrate metabolism; glycogen phosphorylase activity; phosphorylase activity                                                   |
| CG33138                                    |        |       | -1.302 | 1.340 | 1,4-alpha-glucan branching enzyme activity                                                                                         |
| CG8036                                     |        |       | -1.199 | 1.229 | transketolase activity, pentose-phosphate shunt                                                                                    |
| <b>Protein</b>                             |        |       |        |       |                                                                                                                                    |
| <b>Endopeptidase</b>                       |        |       |        |       |                                                                                                                                    |
| CG18030                                    | -0.809 | 2.056 |        |       | serine-type endopeptidase activity                                                                                                 |
| Serine protease 2                          | -0.773 | 2.207 |        |       | chymotrypsin activity; digestion; proteolysis and peptidolysis; serine-type endopeptidase activity; serine-type peptidase activity |
| CG5909                                     | -0.741 | 1.463 | -2.804 | 2.479 | proteolysis and peptidolysis; serine-type endopeptidase activity                                                                   |
| CG9377                                     | -0.621 | 1.304 |        |       | serine-type endopeptidase activity                                                                                                 |
| Nepilysin 4                                | -0.617 | 1.346 |        |       | endothelin-converting enzyme activity; metalloendopeptidase activity                                                               |
| CG8738                                     |        |       | -2.122 | 1.453 | serine-type endopeptidase activity                                                                                                 |
| Ser7                                       |        |       | -1.848 | 1.323 | proteolysis and peptidolysis; serine-type endopeptidase activity; serine-type peptidase activity; trypsin activity                 |
| CG9631                                     |        |       | -1.847 | 1.338 | elastase activity; proteolysis and peptidolysis; serine-type endopeptidase activity                                                |
| CG5896                                     |        |       | -1.435 | 1.346 | proteolysis and peptidolysis; serine-type endopeptidase activity; trypsin activity                                                 |
| <b>Protease inhibitors</b>                 |        |       |        |       |                                                                                                                                    |
| CG8066                                     | -0.752 | 1.438 |        |       | cysteine protease inhibitor activity                                                                                               |
| CG7219                                     | -1.360 | 2.315 | -5.101 | 3.278 | serine protease inhibitor activity                                                                                                 |
| Serine protease inhibitor 1                |        |       | -1.853 | 1.384 | serine protease inhibitor activity                                                                                                 |

|                                                      |        |       |        |       |                                                                                                                                                             |
|------------------------------------------------------|--------|-------|--------|-------|-------------------------------------------------------------------------------------------------------------------------------------------------------------|
| Kaz1-ORFA                                            |        |       | -1.385 | 1.277 | serine protease inhibitor activity                                                                                                                          |
| <b>Proteolysis</b>                                   |        |       |        |       |                                                                                                                                                             |
| CG9649                                               | -0.960 | 1.604 |        |       | elastase activity; enteropeptidase activity; proteolysis and peptidolysis                                                                                   |
| Angiotensin converting enzyme                        | -0.765 | 1.363 |        |       | extracellular; peptidyl-dipeptidase A activity; peptidyl-dipeptidase activity; sperm individualization; spermatid nuclear differentiation; zinc ion binding |
| alphaTrypsin                                         | -0.654 | 1.841 |        |       | extracellular; proteolysis and peptidolysis; trypsin activity                                                                                               |
| CG4847                                               | -0.627 | 1.348 |        |       | cathepsin K activity, Proteolysis                                                                                                                           |
| CG5798                                               |        |       | -3.133 | 2.033 | protein deubiquitination; ubiquitin-specific protease activity                                                                                              |
| CG3097                                               |        |       | -1.946 | 1.645 | carboxypeptidase A activity                                                                                                                                 |
| Ubiquitin conjugating enzyme 2                       |        |       | -1.595 | 1.267 | ubiquitin conjugating enzyme activity; ubiquitin cycle                                                                                                      |
| omega                                                |        |       | -1.276 | 1.337 | dipeptidyl-peptidase IV activity                                                                                                                            |
| Peptidyl-alpha-hydroxyglycine-alpha-amidating lyase  |        |       | -1.148 | 1.293 | peptidylamidoglycolate lyase activity                                                                                                                       |
| <b>AA metabolism</b>                                 |        |       |        |       |                                                                                                                                                             |
| CG6188                                               | -1.723 | 2.324 |        |       | glycine N-methyltransferase activity                                                                                                                        |
| CG11796                                              | -1.350 | 1.927 |        |       | 4-hydroxyphenylpyruvate dioxygenase activity                                                                                                                |
| CG5321                                               | -1.180 | 1.659 |        |       | gamma-butyrobetaine dioxygenase activity (Vitamin biosynthesis)                                                                                             |
| CG10621                                              | -0.805 | 1.475 |        |       | selenocysteine methyltransferase activity                                                                                                                   |
| CG12233                                              | -0.800 | 1.418 |        |       | isocitrate dehydrogenase (NAD) activity; mitochondrial matrix; mitochondrion; tricarboxylic acid cycle                                                      |
| CG4233                                               | -0.694 | 1.394 |        |       | aspartate metabolism; aspartate transaminase activity; mitochondrial matrix; mitochondrion                                                                  |
| CG6415                                               | -0.688 | 1.285 |        |       | aminomethyltransferase activity; glycine catabolism; glycine cleavage complex                                                                               |
| CG15771                                              | -0.660 | 1.281 |        |       | haloacid dehalogenase/epoxide hydrolase                                                                                                                     |
| CG5493                                               |        |       | -1.885 | 1.543 | cysteine dioxygenase activity                                                                                                                               |
| CG1673                                               |        |       | -1.683 | 1.275 | branched chain family amino acid biosynthesis; branched-chain-amino-acid transaminase activity; cytoplasm; mitochondrion                                    |
| Nitrilase and fragile histidine triad fusion protein |        |       | -1.573 | 1.307 | nitrilase activity                                                                                                                                          |
| CG9535                                               |        |       | -1.516 | 1.235 | UDP-N-acetylglucosamine diphosphorylase activity                                                                                                            |
| CG32412                                              |        |       | -1.294 | 1.227 | glutaminy-peptide cyclotransferase activity                                                                                                                 |
| <b>Lipid metabolism</b>                              |        |       |        |       |                                                                                                                                                             |
| CG5966                                               | -1.373 | 3.186 | -2.536 | 1.655 | triacylglycerol lipase activity                                                                                                                             |
| CG6675                                               | -0.771 | 1.396 | -3.326 | 2.031 | lipase activity                                                                                                                                             |
| CG6016                                               | -0.706 | 1.408 |        |       | ethanolaminephosphotransferase activity                                                                                                                     |
| CG5009                                               | -0.677 | 1.443 |        |       | palmitoyl-CoA oxidase activity                                                                                                                              |
| CG1444                                               | -0.642 | 1.264 |        |       | steroid dehydrogenase activity                                                                                                                              |
| CG7529 (JH esterase like)                            | -0.633 | 1.375 |        |       | carboxylesterase activity                                                                                                                                   |
| CG7529                                               | -0.633 | 1.375 |        |       | carboxylesterase activity                                                                                                                                   |
| Cct1                                                 |        |       | -1.332 | 1.276 | CTP:phosphocholine cytidyltransferase 1; choline-phosphate cytidyltransferase activity; determination of adult life span; female gamete generation          |
| CG6783                                               |        |       | -1.283 | 1.247 | fatty acid binding                                                                                                                                          |
| HMG Coenzyme A synthase                              |        |       | -1.159 | 1.264 | hydroxymethylglutaryl-CoA synthase activity                                                                                                                 |
| <b>DNA, RNA and Nucleotide metabolism</b>            |        |       |        |       |                                                                                                                                                             |
| supercoiling factor                                  | -0.913 | 1.447 |        |       | DNA supercoiling activity                                                                                                                                   |
| Deoxyribonuclease II                                 | -0.670 | 1.298 |        |       | deoxyribonuclease II activity                                                                                                                               |

|                                 |        |       |        |       |                                                                                                                                                                                                                                                                                                                                                                                                                                                                                                                                                                                                                 |
|---------------------------------|--------|-------|--------|-------|-----------------------------------------------------------------------------------------------------------------------------------------------------------------------------------------------------------------------------------------------------------------------------------------------------------------------------------------------------------------------------------------------------------------------------------------------------------------------------------------------------------------------------------------------------------------------------------------------------------------|
| <b>Development</b>              |        |       |        |       |                                                                                                                                                                                                                                                                                                                                                                                                                                                                                                                                                                                                                 |
| ninjurin A                      | -0.995 | 1.527 | -2.905 | 1.394 | axon guidance                                                                                                                                                                                                                                                                                                                                                                                                                                                                                                                                                                                                   |
| thread (Inhibitor of apoptosis) | -0.822 | 1.578 | -1.440 | 1.402 | anti-apoptosis; apoptosis; apoptosis inhibitor activity; inhibition of caspase activation; protein monoubiquitination; ubiquitin-protein ligase activity                                                                                                                                                                                                                                                                                                                                                                                                                                                        |
| Buffy                           | -0.648 | 1.320 |        |       | apoptosis; apoptosis activator activity; apoptosis regulator activity; programmed cell death                                                                                                                                                                                                                                                                                                                                                                                                                                                                                                                    |
| sticky ch1                      |        |       | -1.242 | 1.364 | peripheral nervous system development                                                                                                                                                                                                                                                                                                                                                                                                                                                                                                                                                                           |
| fringe                          |        |       | -1.140 | 1.229 | Golgi apparatus; Golgi stack; N signaling pathway; UDP-glycosyltransferase activity; acetylglucosaminyltransferase activity; dorsal/ventral lineage restriction, imaginal disc; dorsal/ventral pattern formation, imaginal disc; egg chamber formation (sensu Insecta); endoplasmic reticulum; eye morphogenesis (sensu Drosophila); integral to membrane; leg disc metamorphosis; negative regulation of N signaling pathway; positive regulation of N signaling pathway; regulation of N signaling pathway; transferase activity, transferring glycosyl groups; wing margin morphogenesis; wing morphogenesis |
| prune                           |        |       | -1.128 | 1.253 | eye pigmentation (sensu Drosophila)                                                                                                                                                                                                                                                                                                                                                                                                                                                                                                                                                                             |
| Yolk protein 2                  |        |       | -1.124 | 1.265 | female gamete generation; sex differentiation; structural molecule activity; vitellogenesis                                                                                                                                                                                                                                                                                                                                                                                                                                                                                                                     |
|                                 |        |       |        |       |                                                                                                                                                                                                                                                                                                                                                                                                                                                                                                                                                                                                                 |
| <b>Unknown</b>                  |        |       |        |       |                                                                                                                                                                                                                                                                                                                                                                                                                                                                                                                                                                                                                 |
| CG9989                          | -1.542 | 2.076 | -3.005 | 1.860 |                                                                                                                                                                                                                                                                                                                                                                                                                                                                                                                                                                                                                 |
| CG2004                          | -1.500 | 2.228 | -1.214 | 1.362 |                                                                                                                                                                                                                                                                                                                                                                                                                                                                                                                                                                                                                 |
| CG10553                         | -1.412 | 2.031 |        |       |                                                                                                                                                                                                                                                                                                                                                                                                                                                                                                                                                                                                                 |
| CG8317                          | -1.386 | 1.974 | -1.860 | 1.481 |                                                                                                                                                                                                                                                                                                                                                                                                                                                                                                                                                                                                                 |
| CG10560                         | -1.344 | 1.748 |        |       |                                                                                                                                                                                                                                                                                                                                                                                                                                                                                                                                                                                                                 |
| CG10513                         | -1.265 | 2.135 |        |       |                                                                                                                                                                                                                                                                                                                                                                                                                                                                                                                                                                                                                 |
| CG10420                         | -1.075 | 1.691 |        |       |                                                                                                                                                                                                                                                                                                                                                                                                                                                                                                                                                                                                                 |
| CG16926                         | -1.048 | 1.493 | -1.247 | 1.252 |                                                                                                                                                                                                                                                                                                                                                                                                                                                                                                                                                                                                                 |
| CG6429                          | -0.982 | 1.834 | -2.369 | 1.942 |                                                                                                                                                                                                                                                                                                                                                                                                                                                                                                                                                                                                                 |
| CG6908                          | -0.973 | 1.673 |        |       |                                                                                                                                                                                                                                                                                                                                                                                                                                                                                                                                                                                                                 |
| CG1416                          | -0.972 | 1.563 |        |       |                                                                                                                                                                                                                                                                                                                                                                                                                                                                                                                                                                                                                 |
| CG7079                          | -0.953 | 1.490 |        |       |                                                                                                                                                                                                                                                                                                                                                                                                                                                                                                                                                                                                                 |
| CG1441                          | -0.943 | 1.603 |        |       |                                                                                                                                                                                                                                                                                                                                                                                                                                                                                                                                                                                                                 |
| CG5156                          | -0.900 | 1.593 |        |       |                                                                                                                                                                                                                                                                                                                                                                                                                                                                                                                                                                                                                 |
| CG8206                          | -0.894 | 1.481 |        |       |                                                                                                                                                                                                                                                                                                                                                                                                                                                                                                                                                                                                                 |
| CG6921                          | -0.881 | 1.492 |        |       |                                                                                                                                                                                                                                                                                                                                                                                                                                                                                                                                                                                                                 |
| CG12560                         | -0.858 | 1.479 | -2.848 | 2.059 |                                                                                                                                                                                                                                                                                                                                                                                                                                                                                                                                                                                                                 |
| CG5295                          | -0.850 | 1.473 | -1.337 | 1.357 |                                                                                                                                                                                                                                                                                                                                                                                                                                                                                                                                                                                                                 |
| CG2217                          | -0.850 | 1.483 | -1.493 | 1.507 |                                                                                                                                                                                                                                                                                                                                                                                                                                                                                                                                                                                                                 |
| CG7832                          | -0.838 | 1.565 |        |       |                                                                                                                                                                                                                                                                                                                                                                                                                                                                                                                                                                                                                 |
| CG31676                         | -0.836 | 1.411 |        |       |                                                                                                                                                                                                                                                                                                                                                                                                                                                                                                                                                                                                                 |
| CG17352                         | -0.833 | 1.552 |        |       |                                                                                                                                                                                                                                                                                                                                                                                                                                                                                                                                                                                                                 |
| CG16772                         | -0.831 | 1.506 | -3.058 | 2.006 |                                                                                                                                                                                                                                                                                                                                                                                                                                                                                                                                                                                                                 |
| CG31764                         | -0.813 | 1.571 | -1.677 | 1.447 |                                                                                                                                                                                                                                                                                                                                                                                                                                                                                                                                                                                                                 |
| CG1774                          | -0.812 | 1.419 | -1.779 | 1.443 |                                                                                                                                                                                                                                                                                                                                                                                                                                                                                                                                                                                                                 |
| CG16978                         | -0.797 | 1.553 | -3.857 | 1.968 |                                                                                                                                                                                                                                                                                                                                                                                                                                                                                                                                                                                                                 |
| CG4618                          | -0.792 | 1.383 | -1.138 | 1.288 |                                                                                                                                                                                                                                                                                                                                                                                                                                                                                                                                                                                                                 |
| CG32647                         | -0.787 | 1.404 |        |       |                                                                                                                                                                                                                                                                                                                                                                                                                                                                                                                                                                                                                 |
| CG8128                          | -0.774 | 1.348 |        |       |                                                                                                                                                                                                                                                                                                                                                                                                                                                                                                                                                                                                                 |
| CG4710                          | -0.772 | 1.563 | -1.753 | 1.822 |                                                                                                                                                                                                                                                                                                                                                                                                                                                                                                                                                                                                                 |
| CG31436                         | -0.762 | 1.445 |        |       |                                                                                                                                                                                                                                                                                                                                                                                                                                                                                                                                                                                                                 |
| CG13328                         | -0.753 | 1.401 |        |       |                                                                                                                                                                                                                                                                                                                                                                                                                                                                                                                                                                                                                 |
| CG14542                         | -0.736 | 1.314 |        |       |                                                                                                                                                                                                                                                                                                                                                                                                                                                                                                                                                                                                                 |
| CG33091                         | -0.732 | 1.325 |        |       |                                                                                                                                                                                                                                                                                                                                                                                                                                                                                                                                                                                                                 |
| CG13360                         | -0.724 | 1.327 |        |       |                                                                                                                                                                                                                                                                                                                                                                                                                                                                                                                                                                                                                 |

|                             |        |       |        |       |                                                 |
|-----------------------------|--------|-------|--------|-------|-------------------------------------------------|
| CG14645                     | -0.716 | 1.729 |        |       |                                                 |
| CG10639                     | -0.702 | 1.368 |        |       |                                                 |
| yellow-b                    | -0.690 | 1.365 | -1.200 | 1.449 |                                                 |
| I(3)07882                   | -0.688 | 1.285 |        |       |                                                 |
| CG13631                     | -0.685 | 1.287 |        |       |                                                 |
| CG6910                      | -0.684 | 1.349 |        |       |                                                 |
| CG14259                     | -0.678 | 1.346 | -1.387 | 1.432 |                                                 |
| CG18021                     | -0.671 | 1.292 |        |       |                                                 |
| CG9312                      | -0.671 | 1.304 |        |       |                                                 |
| CG17059                     | -0.667 | 1.333 |        |       |                                                 |
| CG15203                     | -0.667 | 1.346 |        |       |                                                 |
| CG8229                      | -0.663 | 1.340 |        |       |                                                 |
| CG10103                     | -0.662 | 1.277 |        |       |                                                 |
| CG14536                     | -0.661 | 1.364 |        |       |                                                 |
| CG9821                      | -0.660 | 1.475 |        |       |                                                 |
| CG32706                     | -0.660 | 1.321 |        |       |                                                 |
| CG16817                     | -0.659 | 1.330 |        |       |                                                 |
| CG31352                     | -0.656 | 1.406 |        |       |                                                 |
| CG14687                     | -0.648 | 1.311 |        |       |                                                 |
| CG6218                      | -0.647 | 1.303 |        |       |                                                 |
| CG7778                      | -0.646 | 1.320 | -2.235 | 1.940 |                                                 |
| CG11791                     | -0.645 | 1.300 |        |       |                                                 |
| CG33091                     | -0.644 | 1.334 |        |       |                                                 |
| Protein ejaculatory bulb II | -0.642 | 1.954 |        |       |                                                 |
| CG1124                      | -0.636 | 1.316 |        |       |                                                 |
| CG11309                     | -0.636 | 1.305 |        |       |                                                 |
| jdp                         | -0.631 | 1.346 |        |       | contains a chaperone-j domain; function unknown |
| CG15304                     | -0.628 | 1.300 |        |       |                                                 |
| CG3556                      | -0.628 | 1.251 |        |       |                                                 |
| CG13565                     | -0.627 | 1.413 |        |       |                                                 |
| CG30084                     | -0.623 | 1.415 |        |       |                                                 |
| CG30492                     | -0.622 | 1.396 |        |       |                                                 |
| CG13551                     | -0.620 | 1.366 |        |       |                                                 |
| CG13315                     | -0.614 | 1.399 |        |       |                                                 |
| CG8309                      | -0.614 | 1.339 |        |       |                                                 |
| CG1882                      | -0.611 | 1.253 |        |       |                                                 |
| Male-specific RNA 57Da      | -0.609 | 1.743 |        |       | extracellular                                   |
| CG1021                      | -0.609 | 1.344 |        |       |                                                 |
| CG11594                     | -0.609 | 1.377 |        |       |                                                 |
| CG17278                     |        |       | -3.628 | 2.135 |                                                 |
| CG14567                     |        |       | -3.579 | 1.901 |                                                 |
| CG7299                      |        |       | -3.279 | 1.707 |                                                 |
| CG33085                     |        |       | -2.480 | 1.605 |                                                 |
| CG31324                     |        |       | -2.255 | 1.524 |                                                 |
| CG33056                     |        |       | -2.178 | 1.685 |                                                 |
| CG9914                      |        |       | -2.092 | 1.393 |                                                 |
| CG3165                      |        |       | -2.014 | 1.414 |                                                 |
| CG18779                     |        |       | -1.982 | 2.115 |                                                 |
| CG7192                      |        |       | -1.941 | 1.480 |                                                 |
| CG11819                     |        |       | -1.855 | 1.780 |                                                 |
| CG6891                      |        |       | -1.802 | 1.405 |                                                 |
| CG9400                      |        |       | -1.765 | 1.400 |                                                 |
| CG7816                      |        |       | -1.740 | 1.726 | integral to membrane                            |
| CG6830                      |        |       | -1.722 | 1.430 |                                                 |
| CG15046                     |        |       | -1.691 | 1.378 |                                                 |
| CG5059                      |        |       | -1.678 | 1.514 |                                                 |
| CG10680                     |        |       | -1.623 | 1.394 |                                                 |



|                                    |       |         |       |         |                                                                                                                                                                                                                                                                                                         |
|------------------------------------|-------|---------|-------|---------|---------------------------------------------------------------------------------------------------------------------------------------------------------------------------------------------------------------------------------------------------------------------------------------------------------|
| Metchnikowin                       | 0.898 | 1.47996 |       |         | Gram-positive antibacterial peptide activity; antibacterial humoral response (sensu Invertebrata); antifungal humoral response (sensu Invertebrata); antifungal peptide activity                                                                                                                        |
| CG4740                             | 0.838 | 1.61903 |       |         | Attacin-C                                                                                                                                                                                                                                                                                               |
| Turandot M                         |       |         | 3.532 | 2.21447 | humoral defense mechanism (sensu Protostomia)                                                                                                                                                                                                                                                           |
| Scavenger receptor class C, type I |       |         | 2.191 | 1.67428 | defense response; integral to plasma membrane; phagocytosis; response to bacteria; scavenger receptor activity                                                                                                                                                                                          |
|                                    |       |         |       |         |                                                                                                                                                                                                                                                                                                         |
| <b>Metabolism</b>                  |       |         |       |         |                                                                                                                                                                                                                                                                                                         |
| CG15096                            | 2.104 | 2.29211 |       |         | high affinity inorganic phosphate:sodium symporter activity                                                                                                                                                                                                                                             |
| CG4757                             | 1.111 | 2.26332 | 2.549 | 1.79013 | carboxylesterase activity                                                                                                                                                                                                                                                                               |
| I(2)08717                          | 1.010 | 1.59384 |       |         | high affinity inorganic phosphate:sodium symporter activity                                                                                                                                                                                                                                             |
| CG5798                             | 0.834 | 1.50589 |       |         | protein deubiquitination; ubiquitin-specific protease activity                                                                                                                                                                                                                                          |
| CG12512                            | 0.823 | 1.37084 |       |         | long-chain-fatty-acid-CoA ligase activity                                                                                                                                                                                                                                                               |
| Organic cation transporter         | 0.782 | 1.35261 |       |         | carnitine transporter activity                                                                                                                                                                                                                                                                          |
| CG11407                            |       |         | 4.003 | 2.39307 | long-chain fatty acid transporter activity                                                                                                                                                                                                                                                              |
| CG11459                            |       |         | 2.691 | 1.72851 | NOT cathepsin L activity                                                                                                                                                                                                                                                                                |
| CG3239                             |       |         | 2.603 | 1.65053 | endothelin-converting enzyme activity                                                                                                                                                                                                                                                                   |
| Serine pyruvate aminotransferase   |       |         | 2.283 | 1.47200 | alanine-glyoxylate transaminase activity; mitochondrial matrix; peroxisome; serine-pyruvate transaminase activity                                                                                                                                                                                       |
|                                    |       |         |       |         |                                                                                                                                                                                                                                                                                                         |
| <b>Redox</b>                       |       |         |       |         |                                                                                                                                                                                                                                                                                                         |
| Cyp4d21                            | 1.394 | 1.79932 |       |         | cytochrome P450 activity; membrane; microsome                                                                                                                                                                                                                                                           |
| Cytochrome P450-18a1               | 0.873 | 1.42410 |       |         | cytochrome P450 activity; membrane; microsome; steroid biosynthesis                                                                                                                                                                                                                                     |
| Cyp12c1                            |       |         | 2.697 | 1.46903 | cytochrome P450 activity; mitochondrion                                                                                                                                                                                                                                                                 |
| Cytochrome b5-related              |       |         | 2.477 | 1.64043 | electron transporter activity; mitochondrion                                                                                                                                                                                                                                                            |
| Cyp6d2                             |       |         | 2.315 | 1.54656 | cytochrome P450 activity; membrane; microsome                                                                                                                                                                                                                                                           |
|                                    |       |         |       |         |                                                                                                                                                                                                                                                                                                         |
| <b>Cell signaling molecules</b>    |       |         |       |         |                                                                                                                                                                                                                                                                                                         |
| CG8147                             | 2.659 | 3.99306 | 6.449 | 3.04393 | alkaline phosphatase activity                                                                                                                                                                                                                                                                           |
| timeless                           | 1.066 | 1.97239 |       |         | circadian rhythm; cytoplasm; eclosion rhythm; entrainment of circadian clock; locomotor rhythm; mating behavior; negative regulation of transcription from Pol II promoter; nucleus; protein binding; protein-nucleus import; regulation of circadian sleep/wake cycle, sleep; rhythmic behavior; sleep |
| smell impaired 35A                 | 0.836 | 1.59074 |       |         | olfaction; protein amino acid phosphorylation; protein kinase activity; protein serine/threonine kinase activity                                                                                                                                                                                        |
|                                    |       |         |       |         |                                                                                                                                                                                                                                                                                                         |
| <b>Unknown</b>                     |       |         |       |         |                                                                                                                                                                                                                                                                                                         |
| CG9837                             | 1.500 | 1.80615 |       |         |                                                                                                                                                                                                                                                                                                         |
| CG32774                            | 1.368 | 1.88134 |       |         |                                                                                                                                                                                                                                                                                                         |
| CG14705                            | 1.349 | 4.22070 |       |         |                                                                                                                                                                                                                                                                                                         |
| CG14236                            | 1.249 | 2.45254 |       |         |                                                                                                                                                                                                                                                                                                         |
| CG18135                            | 1.105 | 1.73734 |       |         |                                                                                                                                                                                                                                                                                                         |
| CG31324                            | 1.049 | 1.62852 |       |         |                                                                                                                                                                                                                                                                                                         |
| CG14742                            | 0.841 | 1.59163 |       |         |                                                                                                                                                                                                                                                                                                         |
| CG15921                            | 0.789 | 1.51979 |       |         |                                                                                                                                                                                                                                                                                                         |
| CG4784                             |       |         | 3.762 | 2.00881 |                                                                                                                                                                                                                                                                                                         |
| CG11501                            |       |         | 2.636 | 1.77113 |                                                                                                                                                                                                                                                                                                         |
| CG15281                            |       |         | 2.419 | 1.69538 |                                                                                                                                                                                                                                                                                                         |
| CG5945                             |       |         | 2.311 | 1.57118 |                                                                                                                                                                                                                                                                                                         |
| CG15675                            |       |         | 2.288 | 1.62960 |                                                                                                                                                                                                                                                                                                         |
| CG17108                            |       |         | 2.249 | 1.41401 |                                                                                                                                                                                                                                                                                                         |
| CG11893                            |       |         | 2.244 | 1.72915 |                                                                                                                                                                                                                                                                                                         |

## Supplementary Table S2 for *Interaction between Sleep and the Immune Response in Drosophila: A Role for the NFκB Relish*

Julie A. Williams, Ph.D; Sriram Sathyanarayanan, Ph.D;  
Joan C. Hendricks, V.M.D; Ph.D., Amita Sehgal, Ph.D.

Williams J; Sathyanarayanan S; Hendricks J et al. Interaction between sleep and the immune response in drosophila: a role for the nfkb relish. SLEEP 2007;30(4):389-400.

**Table S2.** Changes in gene expression in Deprivation vs Handled control. Highlighted genes are those that are common to the listed genes that increase in *cyc<sup>01</sup>* in Table S3. Genes with significant T-statistic values (Score) and fold change ( $\Delta$ ) as determined by SAM (significance analysis of microarrays) are listed for each condition and for each genotype. Genes in each functional category are listed in descending order according to the SAM score.

| Genes                                | Rosy  |          | Description                                                                                                                                                                                                                                                                                                                                                                                                                    |
|--------------------------------------|-------|----------|--------------------------------------------------------------------------------------------------------------------------------------------------------------------------------------------------------------------------------------------------------------------------------------------------------------------------------------------------------------------------------------------------------------------------------|
| Increase with Deprivation            | Score | $\Delta$ |                                                                                                                                                                                                                                                                                                                                                                                                                                |
| <b>Immune Response</b>               |       |          |                                                                                                                                                                                                                                                                                                                                                                                                                                |
| CG13422                              | 4.545 | 10.654   | Gram-negative antibacterial peptide activity                                                                                                                                                                                                                                                                                                                                                                                   |
| Drosomycin                           | 4.186 | 5.615    | antifungal humoral response (sensu Invertebrata); antifungal peptide activity                                                                                                                                                                                                                                                                                                                                                  |
| Attacin-B                            | 3.882 | 16.456   | antibacterial humoral response (sensu Invertebrata); antibacterial peptide activity; antimicrobial peptide activity; extracellular                                                                                                                                                                                                                                                                                             |
| Attacin-A                            | 3.704 | 22.347   | Gram-negative antibacterial peptide activity; antibacterial humoral response (sensu Invertebrata); antibacterial peptide activity                                                                                                                                                                                                                                                                                              |
| Metchnikowin                         | 3.524 | 13.105   | Gram-positive antibacterial peptide activity; antibacterial humoral response (sensu Invertebrata); antifungal humoral response (sensu Invertebrata); antifungal peptide activity                                                                                                                                                                                                                                               |
| Immune induced protein 1             | 3.080 | 4.242    | defense response; defense/immunity protein activity; extracellular                                                                                                                                                                                                                                                                                                                                                             |
| Attacin C                            | 2.578 | 17.456   | antibacterial humoral response (sensu Invertebrata); defense response                                                                                                                                                                                                                                                                                                                                                          |
| Diptericin B                         | 2.556 | 13.409   | antibacterial humoral response (sensu Invertebrata); antibacterial peptide activity                                                                                                                                                                                                                                                                                                                                            |
| Diptericin                           | 2.181 | 12.141   | Gram-negative antibacterial peptide activity; antibacterial humoral response (sensu Invertebrata); antibacterial peptide activity                                                                                                                                                                                                                                                                                              |
| Drosocin                             | 2.176 | 12.438   | Gram-negative antibacterial peptide activity; Gram-positive antibacterial peptide activity; anti-Gram-negative bacterial polypeptide induction; antibacterial humoral response (sensu Invertebrata)                                                                                                                                                                                                                            |
| Immune induced protein 2             | 2.155 | 1.771    | defense response; defense/immunity protein activity; extracellular                                                                                                                                                                                                                                                                                                                                                             |
| PGRP-SB1                             | 2.147 | 5.890    | defense response; extracellular; immune response; integral to plasma membrane; peptidoglycan recognition activity                                                                                                                                                                                                                                                                                                              |
| necrotic                             | 2.090 | 2.042    | Tl signaling pathway; antifungal humoral response (sensu Invertebrata); defense response; serine-type endopeptidase inhibitor activity                                                                                                                                                                                                                                                                                         |
| Relish                               | 1.953 | 3.854    | antibacterial polypeptide induction; antifungal polypeptide induction; immune response; nucleus; specific RNA polymerase II transcription factor activity; transcription factor activity                                                                                                                                                                                                                                       |
| Peptidoglycan recognition protein LF | 1.909 | 2.659    | defense response; integral to plasma membrane; peptidoglycan recognition activity                                                                                                                                                                                                                                                                                                                                              |
| Thor                                 | 1.835 | 2.110    | antibacterial humoral response (sensu Invertebrata); defense response; eukaryotic initiation factor 4E binding; immune response; negative regulation of cell size                                                                                                                                                                                                                                                              |
| Cecropin A2                          | 1.799 | 17.356   | Gram-negative antibacterial peptide activity; Gram-positive antibacterial peptide activity; antibacterial humoral response (sensu Invertebrata); antibacterial peptide activity; antifungal peptide activity                                                                                                                                                                                                                   |
| Cecropin A1                          | 1.687 | 26.928   | Gram-negative antibacterial peptide activity; Gram-positive antibacterial peptide activity; antibacterial humoral response (sensu Invertebrata); antibacterial peptide activity; antifungal peptide activity; extracellular                                                                                                                                                                                                    |
| Cactus                               | 1.639 | 1.774    | Tl signaling pathway; antifungal humoral response (sensu Invertebrata); antifungal polypeptide induction; antimicrobial humoral response (sensu Invertebrata); cytoplasm; defense response; dorsal appendage formation; dorsal/ventral axis specification; female gamete generation; immune response; negative regulation of protein-nucleus import; response to fungi; transcription factor binding, cytoplasmic sequestering |



|                                              |          |        |                                                                                                                                                                                                                             |
|----------------------------------------------|----------|--------|-----------------------------------------------------------------------------------------------------------------------------------------------------------------------------------------------------------------------------|
| Cecropin C                                   | 1.594    | 12.494 | Gram-negative antibacterial peptide activity; Gram-positive antibacterial peptide activity; antibacterial humoral response (sensu Invertebrata); antibacterial peptide activity; antifungal peptide activity; extracellular |
| Malvolio                                     | 1.570    | 2.396  | Natural resistance associated macrophage protein; cation transport (divalent cation (iron) uptake)                                                                                                                          |
| Thiolester containing protein IV             | 1.443    | 1.995  | antibacterial humoral response (sensu Invertebrata); antibacterial peptide activity; endopeptidase inhibitor activity                                                                                                       |
| PGRP-SC2                                     | 1.415    | 2.441  | defense response; extracellular; immune response; integral to plasma membrane; peptidoglycan recognition activity                                                                                                           |
| Cecropin B                                   | 1.363    | 9.045  | Gram-negative antibacterial peptide activity; Gram-positive antibacterial peptide activity; antibacterial humoral response (sensu Invertebrata); antibacterial peptide activity; antifungal peptide activity; extracellular |
| Peptidoglycan recognition protein SA         | 1.326    | 2.628  | anti-Gram-positive bacterial polypeptide induction; defense response; extracellular; immune response; integral to plasma membrane; peptidoglycan recognition activity; perception of bacteria                               |
| Defensin                                     | 1.319    | 3.098  | Gram-positive antibacterial peptide activity; anti-Gram-positive bacterial polypeptide induction; antibacterial humoral response (sensu Invertebrata); antibacterial peptide activity                                       |
|                                              |          |        |                                                                                                                                                                                                                             |
| <b>Chaperone activity/heat shock protein</b> |          |        |                                                                                                                                                                                                                             |
| Heat shock protein 68                        | 1.531    | 1.755  | chaperone activity; heat shock protein activity; mitochondrion; response to heat                                                                                                                                            |
| lethal (2) essential for life                | 1.425    | 2.181  | heat shock protein activity                                                                                                                                                                                                 |
| CaBP1                                        | 1.85117  | 3.712  | protein disulfide isomerase activity                                                                                                                                                                                        |
|                                              |          |        |                                                                                                                                                                                                                             |
| <b>Metabolism</b>                            |          |        |                                                                                                                                                                                                                             |
| <b>Carbohydrate</b>                          |          |        |                                                                                                                                                                                                                             |
| CG6188                                       | 3.023    | 4.937  | glycine N-methyltransferase activity                                                                                                                                                                                        |
| CG5191                                       | 1.954    | 2.449  | glutamyl-tRNA(Gln) amidotransferase activity                                                                                                                                                                                |
| CG11307                                      | 1.881    | 1.804  | transferase activity, transferring glycosyl groups                                                                                                                                                                          |
| CG5802                                       | 1.692    | 2.164  | UDP-galactose transporter activity                                                                                                                                                                                          |
|                                              |          |        |                                                                                                                                                                                                                             |
| <b>Protein - Protease inhibitors</b>         |          |        |                                                                                                                                                                                                                             |
| CG16713                                      | 3.246    | 6.611  | serine-type endopeptidase inhibitor activity                                                                                                                                                                                |
| CG7219                                       | 2.909    | 4.329  | serine-type endopeptidase inhibitor activity                                                                                                                                                                                |
| CG6687                                       | 2.319    | 3.737  | serine-type endopeptidase inhibitor activity                                                                                                                                                                                |
| CG16712                                      | 1.472    | 1.535  | serine-type endopeptidase inhibitor activity                                                                                                                                                                                |
| Serine protease inhibitor 1                  | 1.907    | 2.034  | serine-type endopeptidase inhibitor activity                                                                                                                                                                                |
| Serpin-27A                                   | 1.840    | 2.772  | serine-type endopeptidase inhibitor activity                                                                                                                                                                                |
| CG17278                                      | 1.499072 | 1.889  | Kazal type serine protease inhibitor                                                                                                                                                                                        |
|                                              |          |        |                                                                                                                                                                                                                             |
| <b>Protein - Endopeptidase/Proteolysis</b>   |          |        |                                                                                                                                                                                                                             |
| CG3074                                       | 1.935    | 1.992  | cathepsin B activity                                                                                                                                                                                                        |
| CG5909                                       | 1.756    | 3.592  | proteolysis and peptidolysis; serine-type endopeptidase activity                                                                                                                                                            |
| CG9631                                       | 1.689    | 1.573  | elastase activity; proteolysis and peptidolysis; serine-type endopeptidase activity                                                                                                                                         |
| Ser7                                         | 1.585    | 1.606  | proteolysis and peptidolysis; serine-type endopeptidase activity; serine-type peptidase activity; trypsin activity                                                                                                          |
| CG2056                                       | 1.585    | 1.737  | proteolysis and peptidolysis; serine-type endopeptidase activity; trypsin activity                                                                                                                                          |
| CG9645                                       | 1.557    | 1.697  | NOT serine-type endopeptidase activity                                                                                                                                                                                      |
| CG3505                                       | 1.547    | 1.777  | NOT serine-type endopeptidase activity                                                                                                                                                                                      |
| Dipeptidase B                                | 1.486    | 1.991  | cysteine-type endopeptidase activity; dipeptidyl-peptidase and tripeptidyl-peptidase activity; leucyl aminopeptidase activity; lysosome                                                                                     |
| CG2358                                       | 1.422    | 1.744  | signal peptidase activity; signal peptidase complex; signal peptide processing                                                                                                                                              |
| CG5896                                       | 1.402    | 1.601  | proteolysis and peptidolysis; serine-type endopeptidase activity; trypsin activity                                                                                                                                          |
| shanti                                       | 1.370    | 1.640  | signal peptide peptidase activity                                                                                                                                                                                           |
|                                              |          |        |                                                                                                                                                                                                                             |
| <b>Protein - Biosynthesis</b>                |          |        |                                                                                                                                                                                                                             |
| Aspartyl-tRNA synthetase                     | 1.32647  | 1.645  | aspartate-tRNA ligase activity; aspartyl-tRNA aminoacylation                                                                                                                                                                |

|                                              |          |       |                                                                                                                                                                                                                                                                                                                                                                                                                                                                                                          |
|----------------------------------------------|----------|-------|----------------------------------------------------------------------------------------------------------------------------------------------------------------------------------------------------------------------------------------------------------------------------------------------------------------------------------------------------------------------------------------------------------------------------------------------------------------------------------------------------------|
| Translocon-associated protein delta          | 1.548025 | 1.659 | protein-ER retention; signal sequence binding; translocon                                                                                                                                                                                                                                                                                                                                                                                                                                                |
| CG32701                                      | 1.75065  | 1.869 | signal recognition particle receptor complex; signal sequence binding                                                                                                                                                                                                                                                                                                                                                                                                                                    |
| Sec61alpha                                   | 1.311871 | 1.776 | SRP-dependent cotranslational membrane targeting, translocation; cell death; protein transporter activity; translocon                                                                                                                                                                                                                                                                                                                                                                                    |
| Sec61beta                                    | 1.537833 | 1.768 | SRP-dependent cotranslational membrane targeting, translocation; protein transporter activity; translocon                                                                                                                                                                                                                                                                                                                                                                                                |
| CG11642                                      | 1.413558 | 1.749 | SRP-dependent cotranslational membrane targeting; endoplasmic reticulum                                                                                                                                                                                                                                                                                                                                                                                                                                  |
| <b>Lipid metabolism</b>                      |          |       |                                                                                                                                                                                                                                                                                                                                                                                                                                                                                                          |
| CG5966                                       | 2.796    | 3.563 | triacylglycerol lipase activity                                                                                                                                                                                                                                                                                                                                                                                                                                                                          |
| CG6675                                       | 1.898    | 1.718 | lipase activity                                                                                                                                                                                                                                                                                                                                                                                                                                                                                          |
| CG33110                                      | 1.314    | 1.875 | fatty acid biosynthesis; very-long-chain fatty acid metabolism                                                                                                                                                                                                                                                                                                                                                                                                                                           |
| <b>Amino acid metabolism</b>                 |          |       |                                                                                                                                                                                                                                                                                                                                                                                                                                                                                                          |
| CG11089                                      | 1.808    | 1.744 | IMP cyclohydrolase activity; phosphoribosylaminoimidazolecarboxamide formyltransferase activity                                                                                                                                                                                                                                                                                                                                                                                                          |
| CG10814                                      | 1.926532 | 2.466 | gamma-butyrobetaine dioxygenase activity                                                                                                                                                                                                                                                                                                                                                                                                                                                                 |
| ade5                                         | 1.33477  | 1.537 | phosphoribosylaminoimidazole carboxylase activity; phosphoribosylaminoimidazolesuccinocarboxamide synthase activity                                                                                                                                                                                                                                                                                                                                                                                      |
|                                              |          |       |                                                                                                                                                                                                                                                                                                                                                                                                                                                                                                          |
| <b>Redox</b>                                 |          |       |                                                                                                                                                                                                                                                                                                                                                                                                                                                                                                          |
| CG8913                                       | 2.245    | 2.418 | peroxidase activity                                                                                                                                                                                                                                                                                                                                                                                                                                                                                      |
| Glutathione S transferase D1                 | 2.028    | 1.668 | glutathione conjugation reaction; glutathione transferase activity                                                                                                                                                                                                                                                                                                                                                                                                                                       |
| Nmdmc                                        | 1.972    | 2.885 | NAD-dependent methylenetetrahydrofolate dehydrogenase;10-formyltetrahydrofolate metabolism; carbohydrate metabolism; magnesium ion binding; methenyltetrahydrofolate cyclohydrolase activity; methylenetetrahydrofolate dehydrogenase (NAD+) activity; methylenetetrahydrofolate dehydrogenase (NADP+) activity; mitochondrion                                                                                                                                                                           |
| Glutathione S transferase E1                 | 1.790    | 2.004 | glutathione transferase activity; response to oxidative stress                                                                                                                                                                                                                                                                                                                                                                                                                                           |
| thioredoxin-2                                | 1.696    | 1.501 | cell redox homeostasis; cellular_component unknown; thiol-disulfide exchange intermediate activity                                                                                                                                                                                                                                                                                                                                                                                                       |
| Cyt-b5                                       | 1.508    | 1.598 | electron transport; electron transporter activity; membrane; microsome                                                                                                                                                                                                                                                                                                                                                                                                                                   |
| CG12116                                      | 1.46511  | 1.764 | sepiapterin reductase activity                                                                                                                                                                                                                                                                                                                                                                                                                                                                           |
|                                              |          |       |                                                                                                                                                                                                                                                                                                                                                                                                                                                                                                          |
| <b>Signaling Molecules</b>                   |          |       |                                                                                                                                                                                                                                                                                                                                                                                                                                                                                                          |
| <b>GTPase/GTP-binding</b>                    |          |       |                                                                                                                                                                                                                                                                                                                                                                                                                                                                                                          |
| gartenzweg                                   | 1.744    | 1.802 | ARF small monomeric GTPase activity; ER to Golgi transport; Golgi vesicle; intra-Golgi transport                                                                                                                                                                                                                                                                                                                                                                                                         |
| <b>Calcium Ion-Binding</b>                   |          |       |                                                                                                                                                                                                                                                                                                                                                                                                                                                                                                          |
| Amylase distal                               | 2.365    | 3.356 | alpha-amylase activity; calcium ion binding                                                                                                                                                                                                                                                                                                                                                                                                                                                              |
| CG10126                                      | 1.633    | 2.087 | calcium ion binding                                                                                                                                                                                                                                                                                                                                                                                                                                                                                      |
| <b>Kinase</b>                                |          |       |                                                                                                                                                                                                                                                                                                                                                                                                                                                                                                          |
| CG8286                                       | 1.505    | 1.965 | protein kinase inhibitor activity                                                                                                                                                                                                                                                                                                                                                                                                                                                                        |
| <b>Phosphatase</b>                           |          |       |                                                                                                                                                                                                                                                                                                                                                                                                                                                                                                          |
| astray                                       | 2.935    | 3.368 | L-serine biosynthesis; axon guidance; peripheral nervous system development; phosphoserine phosphatase activity                                                                                                                                                                                                                                                                                                                                                                                          |
| <b>Transcription Factor, DNA/RNA binding</b> |          |       |                                                                                                                                                                                                                                                                                                                                                                                                                                                                                                          |
| Pabp2                                        | 2.036    | 2.186 | RNA binding; mRNA polyadenylation                                                                                                                                                                                                                                                                                                                                                                                                                                                                        |
| hairy                                        | 1.840    | 2.335 | bristle morphogenesis; general transcriptional repressor activity; membrane organization and biogenesis; negative regulation of transcription; negative regulation of transcription from Pol II promoter; negative regulation of transcription, DNA-dependent; nucleus; periodic partitioning by pair rule gene; restriction of R8 fate; salivary gland development; salivary gland morphogenesis; specific RNA polymerase II transcription factor activity; specific transcriptional repressor activity |
| CG5064                                       | 1.321    | 1.660 | 7S RNA binding; RNA binding; SRP-dependent cotranslational membrane targeting; signal recognition particle                                                                                                                                                                                                                                                                                                                                                                                               |
| Nop56                                        | 1.374939 | 1.528 | nucleolus; small nuclear ribonucleoprotein complex                                                                                                                                                                                                                                                                                                                                                                                                                                                       |
| <b>Neurotransmission/secretion/receptors</b> |          |       |                                                                                                                                                                                                                                                                                                                                                                                                                                                                                                          |

|                                |          |       |                                                                                                                                                          |
|--------------------------------|----------|-------|----------------------------------------------------------------------------------------------------------------------------------------------------------|
| CG13795                        | 1.659    | 1.967 | amino acid metabolism; sodium:neurotransmitter symporter                                                                                                 |
| <b>Cytoskeletal/Structural</b> |          |       |                                                                                                                                                          |
| Ccp84Ab                        | 1.923    | 2.864 | structural constituent of larval cuticle (sensu Insecta)                                                                                                 |
| Annexin IX                     | 1.847    | 2.006 | actin binding; calcium ion binding; calcium-dependent phospholipid binding; phospholipid binding                                                         |
| cheerio                        | 1.612    | 1.880 | actin binding; determination of adult life span                                                                                                          |
| CG6891                         | 1.488    | 1.506 | actin binding                                                                                                                                            |
| Imaginal disc growth factor 1  | 1.34889  | 1.934 | NOT chitinase activity; extracellular; imaginal disc growth factor activity                                                                              |
| ARP-like                       | 1.752543 | 1.984 | extracellular                                                                                                                                            |
| <b>Transporter</b>             |          |       |                                                                                                                                                          |
| CG11785                        | 1.399444 | 1.613 | Golgi stack; vesicle-mediated transport                                                                                                                  |
| hoepel2                        | 1.694719 | 1.939 | L-tyrosine transporter activity; membrane                                                                                                                |
| <b>Development</b>             |          |       |                                                                                                                                                          |
| rhea                           | 2.067    | 2.041 | cell adhesion                                                                                                                                            |
| thread                         | 1.401    | 1.570 | anti-apoptosis; apoptosis; apoptosis inhibitor activity; inhibition of caspase activation; protein monoubiquitination; ubiquitin-protein ligase activity |
| ninjurin A                     | 1.369    | 1.542 | axon guidance                                                                                                                                            |
| <b>Unknown/Other</b>           |          |       |                                                                                                                                                          |
| CG16772                        | 4.541124 | 6.621 |                                                                                                                                                          |
| CG15066                        | 3.569906 | 5.652 |                                                                                                                                                          |
| CG2217                         | 3.429935 | 8.960 |                                                                                                                                                          |
| CG5791                         | 3.312932 | 5.263 |                                                                                                                                                          |
| CG16978                        | 3.010057 | 3.218 |                                                                                                                                                          |
| CG9989                         | 2.896202 | 3.345 |                                                                                                                                                          |
| CG9358                         | 2.737943 | 4.083 |                                                                                                                                                          |
| CG18279                        | 2.472914 | 2.043 |                                                                                                                                                          |
| CG17107                        | 2.427421 | 2.201 |                                                                                                                                                          |
| CG4786                         | 2.425083 | 2.155 |                                                                                                                                                          |
| CG5778                         | 2.379042 | 2.176 |                                                                                                                                                          |
| CG13947                        | 2.281299 | 1.953 |                                                                                                                                                          |
| CG13335                        | 2.244522 | 5.055 |                                                                                                                                                          |
| CG15067                        | 2.168466 | 2.074 |                                                                                                                                                          |
| CG3165                         | 2.105386 | 2.331 |                                                                                                                                                          |
| CG6429                         | 2.041495 | 3.204 |                                                                                                                                                          |
| CG15825                        | 2.020144 | 1.963 |                                                                                                                                                          |
| CG2004                         | 1.98998  | 2.524 |                                                                                                                                                          |
| CG7296                         | 1.950497 | 2.462 |                                                                                                                                                          |
| CG16844                        | 1.894522 | 1.730 |                                                                                                                                                          |
| CG15065                        | 1.888134 | 1.634 |                                                                                                                                                          |
| CG14567                        | 1.872112 | 1.791 |                                                                                                                                                          |
| CG10420                        | 1.850965 | 2.216 |                                                                                                                                                          |
| CG9080                         | 1.790071 | 2.145 |                                                                                                                                                          |
| SCP-containing protein B       | 1.780085 | 2.570 |                                                                                                                                                          |
| CG7778                         | 1.757517 | 2.494 |                                                                                                                                                          |
| CG4269                         | 1.745457 | 7.056 |                                                                                                                                                          |
| CG16743                        | 1.709699 | 2.423 |                                                                                                                                                          |
| CG14661                        | 1.689963 | 1.655 |                                                                                                                                                          |
| CG31216                        | 1.679231 | 1.981 |                                                                                                                                                          |
| CG6553                         | 1.62495  | 2.036 |                                                                                                                                                          |
| CG18067                        | 1.584681 | 1.515 |                                                                                                                                                          |
| CG3348                         | 1.579373 | 2.100 |                                                                                                                                                          |
| CG17330                        | 1.573292 | 1.877 |                                                                                                                                                          |
| CG4710                         | 1.557204 | 2.323 |                                                                                                                                                          |

|                                            |                 |              |                                                                                                                                                                          |
|--------------------------------------------|-----------------|--------------|--------------------------------------------------------------------------------------------------------------------------------------------------------------------------|
| CG6830                                     | 1.555506        | 1.819        |                                                                                                                                                                          |
| CG12918                                    | 1.546504        | 2.069        |                                                                                                                                                                          |
| CG31764                                    | 1.539969        | 2.359        |                                                                                                                                                                          |
| CG1572                                     | 1.520898        | 1.928        |                                                                                                                                                                          |
| <b>CG14688</b>                             | <b>1.496259</b> | <b>1.585</b> |                                                                                                                                                                          |
| CG13335                                    | 1.444032        | 1.662        |                                                                                                                                                                          |
| CG13941                                    | 1.440502        | 2.111        |                                                                                                                                                                          |
| CG4250                                     | 1.435128        | 1.594        |                                                                                                                                                                          |
| CG5059                                     | 1.413791        | 1.633        |                                                                                                                                                                          |
| CG15021                                    | 1.408572        | 1.752        |                                                                                                                                                                          |
| <b>CG10680</b>                             | <b>1.376553</b> | <b>1.658</b> |                                                                                                                                                                          |
| CG14084                                    | 1.372333        | 1.563        |                                                                                                                                                                          |
| CG9643                                     | 1.364892        | 1.586        |                                                                                                                                                                          |
| CG13965                                    | 1.359651        | 1.564        |                                                                                                                                                                          |
| CG31324                                    | 1.344769        | 1.566        |                                                                                                                                                                          |
| CG11893                                    | 1.327103        | 1.632        |                                                                                                                                                                          |
| CG8303                                     | 1.320132        | 2.413        |                                                                                                                                                                          |
| CG10383                                    | 1.319035        | 1.577        |                                                                                                                                                                          |
|                                            |                 |              |                                                                                                                                                                          |
| <b>Decrease from Deprivation</b>           | <b>Rosy</b>     |              | <b>Description</b>                                                                                                                                                       |
| <b>Genes</b>                               | <b>Score</b>    | $\Delta$     |                                                                                                                                                                          |
| <b>Immune Response</b>                     |                 |              |                                                                                                                                                                          |
| CG16756                                    | -1.45325        | 1.761        | antimicrobial humoral response (sensu Invertebrata); lysozyme activity                                                                                                   |
| CG7227                                     | -2.18567        | 1.708        | defense response; integral to plasma membrane; scavenger receptor activity                                                                                               |
| <b>Metabolism</b>                          |                 |              |                                                                                                                                                                          |
| <b>Carbohydrate</b>                        |                 |              |                                                                                                                                                                          |
| CG4347                                     | -1.24385        | 1.589        | UTP-glucose-1-phosphate uridylyltransferase activity                                                                                                                     |
| CG30035                                    | -1.74115        | 1.560        | carbohydrate transport; glucose transporter activity; integral to membrane                                                                                               |
| CG30035                                    | -1.47138        | 1.663        | carbohydrate transport; glucose transporter activity; integral to membrane                                                                                               |
| CG11909                                    | -1.75746        | 1.683        | alpha-glucosidase activity; alpha-glucosidase complex                                                                                                                    |
| lectin-24Db                                | -1.79553        | 1.566        | fucose binding; galactose binding; mannose binding                                                                                                                       |
| lectin-28C                                 | -1.96298        | 2.787        | galactose binding                                                                                                                                                        |
| Sorbitol dehydrogenase 1                   | -2.55618        | 2.082        | L-idoitol 2-dehydrogenase activity                                                                                                                                       |
| Serine pyruvate aminotransferase           | -1.52119        | 1.583        | alanine-glyoxylate transaminase activity; mitochondrial matrix; peroxisome; serine-pyruvate transaminase activity                                                        |
| <b>Protein - Endopeptidase/Proteolysis</b> |                 |              |                                                                                                                                                                          |
| CG4933                                     | -1.23084        | 1.589        | O-sialoglycoprotein endopeptidase activity                                                                                                                               |
| CG8539                                     | -3.61641        | 2.046        | metallocarboxypeptidase activity                                                                                                                                         |
| Ance-4                                     | -1.21505        | 1.596        | NOT peptidyl-dipeptidase A activity                                                                                                                                      |
| Angiotensin-converting enzyme-related      | -1.42284        | 1.540        | peptidyl-dipeptidase A activity                                                                                                                                          |
| <b>Lipid metabolism</b>                    |                 |              |                                                                                                                                                                          |
| Lipid storage droplet-1                    | -1.45523        | 2.237        | lipid storage                                                                                                                                                            |
| sex-specific enzyme 2                      | -2.00342        | 2.108        | phosphatidylserine-specific phospholipase A1 activity                                                                                                                    |
| alpha-Esterase-1                           | -1.69667        | 2.099        | carboxylesterase activity                                                                                                                                                |
| alpha-Esterase-7                           | -1.51657        | 1.690        | carboxylesterase activity                                                                                                                                                |
| CG7529                                     | -1.71519        | 1.565        | carboxylesterase activity                                                                                                                                                |
| Retinoid- and fatty-acid binding protein   | -1.57729        | 1.772        | fatty acid binding; microtubule binding; retinoid binding; structural molecule activity; transport                                                                       |
| midway                                     | -1.83294        | 1.683        | diacylglycerol O-acyltransferase activity; female gamete generation; regulation of nurse cell apoptosis; sterol O-acyltransferase activity; triacylglycerol biosynthesis |
| CG8112                                     | -2.20879        | 1.774        | sterol O-acyltransferase activity                                                                                                                                        |
| CG31637                                    | -1.18037        | 1.599        | sulfotransferase activity                                                                                                                                                |
| <b>Amino acid metabolism</b>               |                 |              |                                                                                                                                                                          |

|                                              |          |       |                                                                                                                                                                                                                                                           |
|----------------------------------------------|----------|-------|-----------------------------------------------------------------------------------------------------------------------------------------------------------------------------------------------------------------------------------------------------------|
| Pyrroline 5-carboxylate reductase            | -1.61609 | 1.531 | proline biosynthesis; pyrroline-5-carboxylate reductase activity                                                                                                                                                                                          |
| CG5840                                       | -1.40442 | 1.586 | pyrroline-5-carboxylate reductase activity                                                                                                                                                                                                                |
| Phosphoribosylamidotransferase 2             | -2.06107 | 1.616 | 'de novo' IMP biosynthesis; amidophosphoribosyltransferase activity                                                                                                                                                                                       |
|                                              |          |       |                                                                                                                                                                                                                                                           |
| <b>Redox</b>                                 |          |       |                                                                                                                                                                                                                                                           |
| Cyp4ac2                                      | -2.05835 | 1.856 | cytochrome P450 activity; hormone metabolism; insecticide catabolism; membrane; microsome                                                                                                                                                                 |
| Cytochrome P450-4e3                          | -1.26095 | 1.919 | cytochrome P450 activity; membrane; microsome                                                                                                                                                                                                             |
| Cyp6g1                                       | -1.52749 | 1.683 | Resistance to DDT; cytochrome P450 activity; membrane; microsome; response to DDT                                                                                                                                                                         |
| Cytochrome P450-18a1                         | -1.37935 | 1.552 | cytochrome P450 activity; membrane; microsome; steroid biosynthesis                                                                                                                                                                                       |
| Cytochrome b5-related                        | -3.44837 | 1.944 | electron transporter activity; mitochondrion                                                                                                                                                                                                              |
| CG6673                                       | -3.66494 | 2.106 | glutathione transferase activity                                                                                                                                                                                                                          |
| CG31075                                      | -2.975   | 1.758 | aldehyde dehydrogenase (NAD) activity; mitochondrial matrix; mitochondrion; pyruvate metabolism                                                                                                                                                           |
|                                              |          |       |                                                                                                                                                                                                                                                           |
| <b>Signaling Molecules</b>                   |          |       |                                                                                                                                                                                                                                                           |
| <b>Calcium Ion-Binding</b>                   |          |       |                                                                                                                                                                                                                                                           |
| regucalcin                                   | -1.94243 | 1.538 | calcium ion binding                                                                                                                                                                                                                                       |
| <b>Kinase</b>                                |          |       |                                                                                                                                                                                                                                                           |
| Hexokinase C                                 | -1.48409 | 1.792 | hexokinase activity                                                                                                                                                                                                                                       |
| <b>Phosphatase</b>                           |          |       |                                                                                                                                                                                                                                                           |
| CG8147                                       | -2.2293  | 4.087 | alkaline phosphatase activity                                                                                                                                                                                                                             |
| CG9238                                       | -1.58769 | 2.227 | protein phosphatase 1 binding; protein phosphatase type 1 regulator activity                                                                                                                                                                              |
| CG17124                                      | -2.69683 | 2.148 | protein phosphatase inhibitor activity                                                                                                                                                                                                                    |
| CG5171                                       | -1.83983 | 1.707 | trehalose-phosphatase activity                                                                                                                                                                                                                            |
| <b>Neurotransmission/secretion/receptors</b> |          |       |                                                                                                                                                                                                                                                           |
| Gonadotropin-releasing hormone receptor      | -1.99416 | 2.847 | G-protein coupled receptor activity; G-protein coupled receptor protein signaling pathway; gonadotropin-releasing hormone receptor activity; integral to membrane; integral to plasma membrane; neuropeptide receptor activity; peptide receptor activity |
| Odorant-binding protein 99a                  | -1.57418 | 1.900 | odorant binding                                                                                                                                                                                                                                           |
| CG5958                                       | -1.48408 | 1.500 | retinal binding                                                                                                                                                                                                                                           |
| Esterase 6                                   | -1.33541 | 1.634 | carboxylesterase activity; courtship behavior; pheromone biosynthesis; regulation of female receptivity, post-mating; sexual reproduction                                                                                                                 |
|                                              |          |       |                                                                                                                                                                                                                                                           |
| <b>Transporters</b>                          |          |       |                                                                                                                                                                                                                                                           |
| CG4822                                       | -2.58187 | 2.617 | ATP-binding cassette (ABC) transporter activity                                                                                                                                                                                                           |
| Larval serum protein 2                       | -1.20189 | 1.683 | extracellular; larval serum protein complex; nutrient reservoir activity                                                                                                                                                                                  |
| CG15096                                      | -1.7691  | 2.119 | high affinity inorganic phosphate:sodium symporter activity                                                                                                                                                                                               |
| CG7571                                       | -1.18244 | 1.794 | sodium-independent organic anion transporter activity                                                                                                                                                                                                     |
|                                              |          |       |                                                                                                                                                                                                                                                           |
| <b>Development</b>                           |          |       |                                                                                                                                                                                                                                                           |
| Sema-5c                                      | -1.43799 | 2.129 | axon guidance; plasma membrane                                                                                                                                                                                                                            |
|                                              |          |       |                                                                                                                                                                                                                                                           |
| <b>Unknown</b>                               |          |       |                                                                                                                                                                                                                                                           |
| CG4716                                       | -3.66413 | 1.823 |                                                                                                                                                                                                                                                           |
| CG9837                                       | -2.71313 | 1.713 |                                                                                                                                                                                                                                                           |
| CG16898                                      | -2.63173 | 3.530 |                                                                                                                                                                                                                                                           |
| CG15092                                      | -2.61478 | 2.073 |                                                                                                                                                                                                                                                           |
| CG6067                                       | -2.26027 | 2.244 |                                                                                                                                                                                                                                                           |
| CG5867                                       | -2.23533 | 1.605 |                                                                                                                                                                                                                                                           |
| CG18302                                      | -2.21142 | 2.313 |                                                                                                                                                                                                                                                           |
| CG2081                                       | -2.09106 | 1.747 |                                                                                                                                                                                                                                                           |
| CG9497                                       | -2.02177 | 1.848 |                                                                                                                                                                                                                                                           |
| CG10553                                      | -1.93129 | 1.805 |                                                                                                                                                                                                                                                           |
| CG17108                                      | -1.8873  | 1.504 |                                                                                                                                                                                                                                                           |

|         |          |       |  |
|---------|----------|-------|--|
| CG14021 | -1.87858 | 1.694 |  |
| CG10799 | -1.61258 | 1.739 |  |
| CG31778 | -1.61115 | 2.088 |  |
| CG18240 | -1.59046 | 1.874 |  |
| CG18135 | -1.58017 | 1.661 |  |
| CG6770  | -1.56296 | 1.500 |  |
| CG30019 | -1.48086 | 1.580 |  |

**Supplementary Table S3 for *Interaction between Sleep and the Immune Response in Drosophila: A Role for the NFκB Relish***

Julie A. Williams, Ph.D; Sriram Sathyanarayanan, Ph.D;  
Joan C. Hendricks, V.M.D; Ph.D., Amita Sehgal, Ph.D.

Williams J; Sathyanarayanan S; Hendricks J et al. Interaction between sleep and the immune response in drosophila: a role for the nfκb relish. SLEEP 2007;30(4):389-400.

**Table S3.** Changes in gene expression in *cyc<sup>01</sup>* vs *rosy*. Highlighted genes are those that are common to the listed genes that increase with deprivation in Table S2. Genes with significant T-statistic values (Score) and fold change (Δ) as determined by SAM (significance analysis of microarrays) are listed for each condition and for each genotype. Genes in each functional category are listed in descending order according to the SAM score.

| <b>Genes upregulated in <i>cyc<sup>01</sup></i></b> | <b>Score</b> | <b>Fold Change</b> | <b>Description</b>                                                                                                                                                                                                                                                                                                                                                                                          |
|-----------------------------------------------------|--------------|--------------------|-------------------------------------------------------------------------------------------------------------------------------------------------------------------------------------------------------------------------------------------------------------------------------------------------------------------------------------------------------------------------------------------------------------|
| <b>Immune Response</b>                              |              |                    |                                                                                                                                                                                                                                                                                                                                                                                                             |
| CG13422                                             | 1.231        | 3.136              | Gram-negative antibacterial peptide activity                                                                                                                                                                                                                                                                                                                                                                |
| Metchnikowin                                        | 1.225        | 5.246              | Gram-positive antibacterial peptide activity; antibacterial humoral response (sensu Invertebrata); antifungal humoral response (sensu Invertebrata); antifungal peptide activity                                                                                                                                                                                                                            |
| Immune induced protein 1                            | 1.148        | 3.396              | defense response; defense/immunity protein activity; extracellular                                                                                                                                                                                                                                                                                                                                          |
| spatzle                                             | 1.120        | 3.094              | Tl signaling pathway; Toll binding; antifungal humoral response (sensu Invertebrata); antifungal polypeptide induction; defense response; dorsal/ventral axis specification; embryonic axis specification; extracellular; innate immune response; maternal determination of dorsal/ventral axis, oocyte, germ-line encoded; morphogen activity; oocyte dorsal/ventral axis determination; response to fungi |
| BG4                                                 | 0.947        | 3.047              | death receptor adaptor protein activity; defense response; immune response; protein binding; signal transduction                                                                                                                                                                                                                                                                                            |
| CG6459                                              | 0.886        | 2.290              | mitochondrial matrix; mitochondrion                                                                                                                                                                                                                                                                                                                                                                         |
| CG7227                                              | 0.856        | 2.397              | defense response; integral to plasma membrane; scavenger receptor activity                                                                                                                                                                                                                                                                                                                                  |
| Thor                                                | 0.852        | 2.135              | antibacterial humoral response (sensu Invertebrata); defense response; eukaryotic initiation factor 4E binding; immune response; negative regulation of cell size                                                                                                                                                                                                                                           |
| epithelial membrane protein                         | 0.840        | 2.493              | defense response; integral to plasma membrane; plasma membrane; scavenger receptor activity                                                                                                                                                                                                                                                                                                                 |
| Drosomycin                                          | 0.818        | 2.278              | antifungal humoral response (sensu Invertebrata); antifungal peptide activity                                                                                                                                                                                                                                                                                                                               |
| Diptericin                                          | 0.816        | 3.160              | Gram-negative antibacterial peptide activity; antibacterial humoral response (sensu Invertebrata); antibacterial peptide activity                                                                                                                                                                                                                                                                           |
| PGRP-SB1                                            | 0.810        | 2.263              | defense response; extracellular; immune response; integral to plasma membrane; peptidoglycan recognition activity                                                                                                                                                                                                                                                                                           |
| Dorsal-related immunity factor                      | 0.777        | 2.248              | DNA binding; Tl signaling pathway; cytoplasm; defense response; immune response; innate immune response; nucleus; response to fungi; transcription factor activity                                                                                                                                                                                                                                          |
| CG8193                                              | 0.768        | 2.221              | defense response; monophenol monooxygenase activity                                                                                                                                                                                                                                                                                                                                                         |
| CG2736                                              | 0.758        | 2.144              | defense response; integral to plasma membrane; scavenger receptor activity                                                                                                                                                                                                                                                                                                                                  |
| Attacin-C                                           | 0.757        | 2.680              | antibacterial humoral response (sensu Invertebrata); defense response                                                                                                                                                                                                                                                                                                                                       |

|                                      |       |       |                                                                                                                                                                                                                                                                                                                                                                                                                                                                                                                                                                                                                                                                                                                                                                                                                                                                                                                                                                                                         |
|--------------------------------------|-------|-------|---------------------------------------------------------------------------------------------------------------------------------------------------------------------------------------------------------------------------------------------------------------------------------------------------------------------------------------------------------------------------------------------------------------------------------------------------------------------------------------------------------------------------------------------------------------------------------------------------------------------------------------------------------------------------------------------------------------------------------------------------------------------------------------------------------------------------------------------------------------------------------------------------------------------------------------------------------------------------------------------------------|
| dorsal                               | 0.746 | 3.366 | DNA binding; RNA polymerase II transcription factor activity; T1 signaling pathway; anterior/posterior pattern formation; cytoplasm; defense response; dorsal/ventral axis specification; dorsal/ventral pattern formation; ectoderm cell fate specification; ectoderm development; gastrulation; germ-cell migration; heart development; immune response; maternal determination of anterior/posterior axis, embryo; mesoderm cell fate specification; mesoderm development; morphogen activity; negative regulation of transcription; negative regulation of transcription from Pol II promoter; negative regulation of transcription, DNA-dependent; nucleus; positive regulation of transcription from Pol II promoter; positive regulation of transcription, DNA-dependent; regulation of transcription; specific RNA polymerase II transcription factor activity; transcription factor activity; transcriptional activator activity; transcriptional repressor activity; ventral cord development |
| Relish                               | 0.745 | 2.112 | antibacterial polypeptide induction; antifungal polypeptide induction; immune response; nucleus; specific RNA polymerase II transcription factor activity; transcription factor activity                                                                                                                                                                                                                                                                                                                                                                                                                                                                                                                                                                                                                                                                                                                                                                                                                |
| Lysozyme D                           | 0.739 | 2.653 | antimicrobial humoral response (sensu Invertebrata); chitinase activity; lysozyme activity                                                                                                                                                                                                                                                                                                                                                                                                                                                                                                                                                                                                                                                                                                                                                                                                                                                                                                              |
| Diptericin B                         | 0.686 | 2.413 | antibacterial humoral response (sensu Invertebrata); antibacterial peptide activity                                                                                                                                                                                                                                                                                                                                                                                                                                                                                                                                                                                                                                                                                                                                                                                                                                                                                                                     |
| Drosocin                             | 0.682 | 2.367 | Gram-negative antibacterial peptide activity; Gram-positive antibacterial peptide activity; anti-Gram-negative bacterial polypeptide induction; antibacterial humoral response (sensu Invertebrata)                                                                                                                                                                                                                                                                                                                                                                                                                                                                                                                                                                                                                                                                                                                                                                                                     |
| <b>Chaperone activity/Heat shock</b> |       |       |                                                                                                                                                                                                                                                                                                                                                                                                                                                                                                                                                                                                                                                                                                                                                                                                                                                                                                                                                                                                         |
| CG7033                               | 1.921 | 8.886 | chaperone activity; chaperonin-containing T-complex                                                                                                                                                                                                                                                                                                                                                                                                                                                                                                                                                                                                                                                                                                                                                                                                                                                                                                                                                     |
| CG10635                              | 1.311 | 3.740 | 'de novo' protein folding; co-chaperonin activity; prefoldin complex                                                                                                                                                                                                                                                                                                                                                                                                                                                                                                                                                                                                                                                                                                                                                                                                                                                                                                                                    |
| Cctgamma                             | 1.044 | 2.700 | chaperonin ATPase activity; chaperonin-containing T-complex; cytoplasm; protein folding                                                                                                                                                                                                                                                                                                                                                                                                                                                                                                                                                                                                                                                                                                                                                                                                                                                                                                                 |
| CG4461                               | 0.986 | 2.465 | heat shock protein activity; response to heat                                                                                                                                                                                                                                                                                                                                                                                                                                                                                                                                                                                                                                                                                                                                                                                                                                                                                                                                                           |
| Hop                                  | 0.899 | 2.515 | Hsp70/Hsp90 organizing protein activity; chaperone activity                                                                                                                                                                                                                                                                                                                                                                                                                                                                                                                                                                                                                                                                                                                                                                                                                                                                                                                                             |
| Roe1                                 | 0.874 | 2.167 | chaperone activity; mitochondrial matrix; mitochondrion; protein-mitochondrial targeting                                                                                                                                                                                                                                                                                                                                                                                                                                                                                                                                                                                                                                                                                                                                                                                                                                                                                                                |
| CaBP1                                | 0.874 | 2.275 | protein disulfide isomerase activity                                                                                                                                                                                                                                                                                                                                                                                                                                                                                                                                                                                                                                                                                                                                                                                                                                                                                                                                                                    |
| CG7409                               | 0.791 | 2.119 | chaperone activity                                                                                                                                                                                                                                                                                                                                                                                                                                                                                                                                                                                                                                                                                                                                                                                                                                                                                                                                                                                      |
| I(2)efl                              | 0.759 | 2.168 | heat shock protein activity                                                                                                                                                                                                                                                                                                                                                                                                                                                                                                                                                                                                                                                                                                                                                                                                                                                                                                                                                                             |
| Tcp1-like                            | 0.711 | 2.036 | ATP binding; chaperone activity; chaperonin-containing T-complex; protein folding                                                                                                                                                                                                                                                                                                                                                                                                                                                                                                                                                                                                                                                                                                                                                                                                                                                                                                                       |
| <b>Metabolism</b>                    |       |       |                                                                                                                                                                                                                                                                                                                                                                                                                                                                                                                                                                                                                                                                                                                                                                                                                                                                                                                                                                                                         |
| <b>Carbohydrate metabolism</b>       |       |       |                                                                                                                                                                                                                                                                                                                                                                                                                                                                                                                                                                                                                                                                                                                                                                                                                                                                                                                                                                                                         |
| CG9232                               | 1.579 | 5.194 | UDP-glucose-hexose-1-phosphate uridylyltransferase activity; UTP-galactose-1-phosphate uridylyltransferase activity; cellular_component unknown; galactose metabolism                                                                                                                                                                                                                                                                                                                                                                                                                                                                                                                                                                                                                                                                                                                                                                                                                                   |
| CG1208                               | 1.212 | 3.054 | glucose transporter activity                                                                                                                                                                                                                                                                                                                                                                                                                                                                                                                                                                                                                                                                                                                                                                                                                                                                                                                                                                            |
| Phosphomannomutase 45A               | 1.072 | 2.912 | phosphomannomutase activity                                                                                                                                                                                                                                                                                                                                                                                                                                                                                                                                                                                                                                                                                                                                                                                                                                                                                                                                                                             |
| CG32444                              | 1.038 | 2.872 | aldose 1-epimerase activity                                                                                                                                                                                                                                                                                                                                                                                                                                                                                                                                                                                                                                                                                                                                                                                                                                                                                                                                                                             |
| CG31414                              | 1.014 | 2.661 | glucosylceramidase activity                                                                                                                                                                                                                                                                                                                                                                                                                                                                                                                                                                                                                                                                                                                                                                                                                                                                                                                                                                             |
| Ugt86Da                              | 0.906 | 2.341 | glucuronosyltransferase activity                                                                                                                                                                                                                                                                                                                                                                                                                                                                                                                                                                                                                                                                                                                                                                                                                                                                                                                                                                        |
| CG10627                              | 0.860 | 2.155 | phosphoacetylglucosamine mutase activity                                                                                                                                                                                                                                                                                                                                                                                                                                                                                                                                                                                                                                                                                                                                                                                                                                                                                                                                                                |
| Phosphogluconate dehydrogenase       | 0.829 | 2.219 | pentose-phosphate shunt; phosphogluconate dehydrogenase (decarboxylating) activity                                                                                                                                                                                                                                                                                                                                                                                                                                                                                                                                                                                                                                                                                                                                                                                                                                                                                                                      |
| I(2)k05713                           | 0.827 | 2.066 | glycerol metabolism; glycerol-3-phosphate dehydrogenase activity; mitochondrion                                                                                                                                                                                                                                                                                                                                                                                                                                                                                                                                                                                                                                                                                                                                                                                                                                                                                                                         |
| CG33138                              | 0.800 | 2.141 | 1,4-alpha-glucan branching enzyme activity                                                                                                                                                                                                                                                                                                                                                                                                                                                                                                                                                                                                                                                                                                                                                                                                                                                                                                                                                              |
| CG10178                              | 0.796 | 2.088 | glucuronosyltransferase activity                                                                                                                                                                                                                                                                                                                                                                                                                                                                                                                                                                                                                                                                                                                                                                                                                                                                                                                                                                        |
| CG11796                              | 0.789 | 2.283 | 4-hydroxyphenylpyruvate dioxygenase activity                                                                                                                                                                                                                                                                                                                                                                                                                                                                                                                                                                                                                                                                                                                                                                                                                                                                                                                                                            |
| Ugt35b                               | 0.760 | 2.163 | glucuronosyltransferase activity                                                                                                                                                                                                                                                                                                                                                                                                                                                                                                                                                                                                                                                                                                                                                                                                                                                                                                                                                                        |
| fringe                               | 0.707 | 2.090 | UDP-glycosyltransferase activity                                                                                                                                                                                                                                                                                                                                                                                                                                                                                                                                                                                                                                                                                                                                                                                                                                                                                                                                                                        |



|                                           |       |        |                                                                                                                                                                                                                                                                                                                                                                                                                                                                                                                                                                                                                    |
|-------------------------------------------|-------|--------|--------------------------------------------------------------------------------------------------------------------------------------------------------------------------------------------------------------------------------------------------------------------------------------------------------------------------------------------------------------------------------------------------------------------------------------------------------------------------------------------------------------------------------------------------------------------------------------------------------------------|
| shaggy                                    | 0.696 | 2.277  | N signaling pathway; Wnt receptor signaling pathway; blastoderm segmentation; bristle morphogenesis; circadian rhythm; glycogen synthase kinase 3 activity; heart development; locomotor rhythm; negative regulation of Wnt receptor signaling pathway; protein amino acid phosphorylation; protein localization; protein serine/threonine kinase activity; regulation of protein-nucleus import; regulation of proteolysis and peptidolysis; regulation of smoothed receptor signaling pathway; regulation of transcription, DNA-dependent; rhythmic behavior; segment polarity determination; wing morphogenesis |
| lectin-28C                                | 0.619 | 2.197  | galactose binding                                                                                                                                                                                                                                                                                                                                                                                                                                                                                                                                                                                                  |
| <b>Protein - Synthesis</b>                |       |        |                                                                                                                                                                                                                                                                                                                                                                                                                                                                                                                                                                                                                    |
| mitochondrial ribosomal protein S17       | 1.389 | 4.801  | mitochondrial small ribosomal subunit; protein biosynthesis; structural constituent of ribosome                                                                                                                                                                                                                                                                                                                                                                                                                                                                                                                    |
| mitochondrial ribosomal protein L30       | 1.285 | 3.978  | mitochondrial large ribosomal subunit; protein biosynthesis; structural constituent of ribosome                                                                                                                                                                                                                                                                                                                                                                                                                                                                                                                    |
| alpha-Man-IIb                             | 1.284 | 6.678  | Golgi apparatus; alpha-mannosidase activity; mannosyl-oligosaccharide 1,3-1,6-alpha-mannosidase activity                                                                                                                                                                                                                                                                                                                                                                                                                                                                                                           |
| CG4406                                    | 0.943 | 2.375  | GPI-anchor transamidase activity                                                                                                                                                                                                                                                                                                                                                                                                                                                                                                                                                                                   |
| CG3639                                    | 0.888 | 2.355  | integral to peroxisomal membrane; peroxisome organization and biogenesis; protein-peroxisome targeting                                                                                                                                                                                                                                                                                                                                                                                                                                                                                                             |
| Translocon-associated protein delta       | 0.812 | 2.033  | protein-ER retention; signal sequence binding; translocon                                                                                                                                                                                                                                                                                                                                                                                                                                                                                                                                                          |
| eIF3-S8                                   | 0.701 | 2.043  | cytosol; eukaryotic translation initiation factor 3 complex; translation initiation factor activity; translational initiation                                                                                                                                                                                                                                                                                                                                                                                                                                                                                      |
| <b>Protein - Protease inhibitors</b>      |       |        |                                                                                                                                                                                                                                                                                                                                                                                                                                                                                                                                                                                                                    |
| Thiolester containing protein III         | 1.133 | 3.738  | endopeptidase inhibitor activity                                                                                                                                                                                                                                                                                                                                                                                                                                                                                                                                                                                   |
| Serine protease inhibitor 5               | 1.096 | 3.292  | serine-type endopeptidase inhibitor activity                                                                                                                                                                                                                                                                                                                                                                                                                                                                                                                                                                       |
| CG6687                                    | 0.929 | 2.250  | serine-type endopeptidase inhibitor activity                                                                                                                                                                                                                                                                                                                                                                                                                                                                                                                                                                       |
| CG7219                                    | 0.790 | 2.069  | serine-type endopeptidase inhibitor activity                                                                                                                                                                                                                                                                                                                                                                                                                                                                                                                                                                       |
| Macroglobulin complement-related          | 0.626 | 2.451  | endopeptidase inhibitor activity                                                                                                                                                                                                                                                                                                                                                                                                                                                                                                                                                                                   |
| <b>Protein - Proteolysis, Degradation</b> |       |        |                                                                                                                                                                                                                                                                                                                                                                                                                                                                                                                                                                                                                    |
| CG11951                                   | 1.752 | 6.971  | membrane alanyl aminopeptidase activity                                                                                                                                                                                                                                                                                                                                                                                                                                                                                                                                                                            |
| CG6298                                    | 1.399 | 7.678  | chymotrypsin activity; proteolysis and peptidolysis                                                                                                                                                                                                                                                                                                                                                                                                                                                                                                                                                                |
| CG2105                                    | 1.347 | 4.751  | proteolysis and peptidolysis; serine-type endopeptidase activity; trypsin activity                                                                                                                                                                                                                                                                                                                                                                                                                                                                                                                                 |
| Proteasome alpha6 subunit                 | 1.334 | 3.515  | endopeptidase activity; proteasome core complex (sensu Eukarya)                                                                                                                                                                                                                                                                                                                                                                                                                                                                                                                                                    |
| CG9649                                    | 1.292 | 3.610  | elastase activity; enteropeptidase activity; proteolysis and peptidolysis                                                                                                                                                                                                                                                                                                                                                                                                                                                                                                                                          |
| Dipeptidase B                             | 1.178 | 3.214  | cysteine-type endopeptidase activity; dipeptidyl-peptidase and tripeptidyl-peptidase activity; leucyl aminopeptidase activity; lysosome                                                                                                                                                                                                                                                                                                                                                                                                                                                                            |
| CG9377                                    | 1.150 | 4.222  | NOT serine-type endopeptidase activity                                                                                                                                                                                                                                                                                                                                                                                                                                                                                                                                                                             |
| CG11459                                   | 1.126 | 2.899  | NOT cathepsin L activity                                                                                                                                                                                                                                                                                                                                                                                                                                                                                                                                                                                           |
| ProsMA5                                   | 1.107 | 2.756  | Proteasome alpha subunit; ATP-dependent proteolysis; endopeptidase activity; proteasome complex (sensu Eukarya); proteasome core complex (sensu Eukarya); ubiquitin-dependent protein catabolism                                                                                                                                                                                                                                                                                                                                                                                                                   |
| CG3074                                    | 1.001 | 2.482  | cathepsin B activity                                                                                                                                                                                                                                                                                                                                                                                                                                                                                                                                                                                               |
| CG11771                                   | 0.943 | 2.545  | oligopeptidase A activity                                                                                                                                                                                                                                                                                                                                                                                                                                                                                                                                                                                          |
| Serine protease 2                         | 0.929 | 12.026 | chymotrypsin activity; digestion; proteolysis and peptidolysis; serine-type endopeptidase activity; serine-type peptidase activity                                                                                                                                                                                                                                                                                                                                                                                                                                                                                 |
| CG3775                                    | 0.921 | 2.511  | neprilysin activity                                                                                                                                                                                                                                                                                                                                                                                                                                                                                                                                                                                                |
| CG31217                                   | 0.918 | 2.532  | Serine protease like 89E; low-density lipoprotein receptor activity; proteolysis and peptidolysis; scavenger receptor activity; serine-type endopeptidase activity                                                                                                                                                                                                                                                                                                                                                                                                                                                 |
| CG4914                                    | 0.834 | 2.248  | proteolysis and peptidolysis; serine-type endopeptidase activity; trypsin activity                                                                                                                                                                                                                                                                                                                                                                                                                                                                                                                                 |
| Ance-4                                    | 0.832 | 2.770  | NOT peptidyl-dipeptidase A activity                                                                                                                                                                                                                                                                                                                                                                                                                                                                                                                                                                                |
| Nepriylsin 4                              | 0.791 | 2.117  | endothelin-converting enzyme activity; metalloendopeptidase activity                                                                                                                                                                                                                                                                                                                                                                                                                                                                                                                                               |
| CG10472                                   | 0.764 | 2.069  | chymotrypsin activity; proteolysis and peptidolysis; serine-type endopeptidase activity                                                                                                                                                                                                                                                                                                                                                                                                                                                                                                                            |
| CG4723                                    | 0.736 | 2.045  | endothelin-converting enzyme activity                                                                                                                                                                                                                                                                                                                                                                                                                                                                                                                                                                              |
| CG4721                                    | 0.721 | 2.028  | metalloendopeptidase activity                                                                                                                                                                                                                                                                                                                                                                                                                                                                                                                                                                                      |

|                               |       |       |                                                                                                                                                                                                         |
|-------------------------------|-------|-------|---------------------------------------------------------------------------------------------------------------------------------------------------------------------------------------------------------|
| CG3513                        | 0.709 | 2.024 | endopeptidase activity                                                                                                                                                                                  |
| CG9372                        | 0.683 | 2.008 | proteolysis and peptidolysis; serine-type peptidase activity; trypsin activity                                                                                                                          |
| <b>Lipid metabolism</b>       |       |       |                                                                                                                                                                                                         |
| alpha-Esterase-2              | 1.707 | 6.701 | carboxylesterase activity                                                                                                                                                                               |
| bubblegum                     | 1.355 | 5.607 | long-chain-fatty-acid-CoA ligase activity                                                                                                                                                               |
| Cct2                          | 1.121 | 3.428 | choline-phosphate cytidyltransferase activity                                                                                                                                                           |
| CG4757                        | 0.951 | 3.091 | carboxylesterase activity                                                                                                                                                                               |
| CG9743                        | 0.819 | 2.075 | stearoyl-CoA 9-desaturase activity                                                                                                                                                                      |
| CG5991                        | 0.807 | 2.055 | phosphatidylserine decarboxylase activity                                                                                                                                                               |
| Sphingosine-1-phosphate lyase | 0.804 | 2.129 | sphinganine-1-phosphate aldolase activity; sphingolipid catabolism                                                                                                                                      |
| Lipid storage droplet-2       | 0.783 | 2.372 | lipid particle; lipid storage; molecular_function unknown                                                                                                                                               |
| CG17292                       | 0.776 | 2.098 | triacylglycerol lipase activity                                                                                                                                                                         |
| CG5397                        | 0.748 | 2.210 | sterol O-acyltransferase activity                                                                                                                                                                       |
| CG3523                        | 0.727 | 2.176 | fatty-acid synthase activity                                                                                                                                                                            |
| CG15828                       | 0.657 | 2.143 | extracellular space; lipid binding                                                                                                                                                                      |
| <b>Amino Acid metabolism</b>  |       |       |                                                                                                                                                                                                         |
| CG8734                        | 1.174 | 3.001 | acetylglucosaminyltransferase activity; chondroitin sulfate biosynthesis; galactosyltransferase activity; heparan sulfate proteoglycan biosynthesis; transferase activity, transferring glycosyl groups |
| Updo                          | 1.080 | 2.938 | uroporphyrinogen decarboxylase activity                                                                                                                                                                 |
| CG1827                        | 1.021 | 2.730 | N4-(beta-N-acetylglucosaminy)-L-asparaginase activity                                                                                                                                                   |
| NitFhit                       | 1.007 | 2.591 | nitrilase activity                                                                                                                                                                                      |
| Fumarylacetoacetase           | 0.968 | 2.531 | fumarylacetoacetase activity                                                                                                                                                                            |
| CG8430                        | 0.963 | 2.783 | aspartate metabolism; aspartate transaminase activity; mitochondrial matrix                                                                                                                             |
| CG8745                        | 0.916 | 2.364 | ornithine-oxo-acid transaminase activity                                                                                                                                                                |
| homogentisate 1,2-dioxygenase | 0.836 | 2.096 | homogentisate 1,2-dioxygenase activity; phenylalanine catabolism; tyrosine catabolism                                                                                                                   |
| CG15093                       | 0.825 | 2.069 | 3-hydroxyisobutyrate dehydrogenase activity; amino acid metabolism; mitochondrion                                                                                                                       |
| CG5618                        | 0.813 | 2.102 | sulfinoalanine decarboxylase activity                                                                                                                                                                   |
| ATP citrate lyase             | 0.743 | 2.056 | ATP citrate synthase activity; acetyl-CoA biosynthesis                                                                                                                                                  |
| CG11089                       | 0.715 | 2.069 | IMP cyclohydrolase activity; phosphoribosylaminoimidazolecarboxamide formyltransferase activity                                                                                                         |
| CG1461                        | 0.707 | 2.108 | tyrosine transaminase activity                                                                                                                                                                          |
| <b>Redox</b>                  |       |       |                                                                                                                                                                                                         |
| CG6910                        | 1.848 | 9.023 | oxidoreductase activity; carbohydrate metabolism                                                                                                                                                        |
| Cyp12c1                       | 1.669 | 6.450 | cytochrome P450 activity; mitochondrion                                                                                                                                                                 |
| Cyp4p1                        | 1.641 | 6.421 | cytochrome P450 activity; membrane; microsome                                                                                                                                                           |
| Cyp6a23                       | 1.517 | 5.540 | cytochrome P450 activity; membrane; microsome                                                                                                                                                           |
| Cyp6a20                       | 1.460 | 5.571 | cytochrome P450 activity; membrane; microsome                                                                                                                                                           |
| CG6074                        | 1.367 | 4.674 | carbonate dehydratase activity                                                                                                                                                                          |
| Cyp6w1                        | 1.266 | 4.217 | cytochrome P450 activity; membrane; microsome                                                                                                                                                           |
| CG9249                        | 1.188 | 3.102 | hexaprenyldihydroxybenzoate methyltransferase activity; ubiquinone metabolism                                                                                                                           |
| CG8888                        | 1.153 | 3.235 | oxidoreductase activity, acting on CH-OH group of donors                                                                                                                                                |
| CG2254                        | 1.112 | 3.014 | oxidoreductase activity                                                                                                                                                                                 |
| CG12116                       | 1.047 | 2.713 | sepiapterin reductase activity                                                                                                                                                                          |
| CG5590                        | 1.045 | 2.721 | oxidoreductase activity, acting on the CH-OH group of donors, NAD or NADP as acceptor                                                                                                                   |
| Cyp4ac1                       | 1.024 | 3.517 | cytochrome P450 activity; hormone metabolism; insecticide catabolism; membrane; microsome                                                                                                               |
| CG3902                        | 0.924 | 2.473 | short-branched-chain-acyl-CoA dehydrogenase activity                                                                                                                                                    |
| Cyt-b5                        | 0.869 | 2.144 | electron transport; electron transporter activity; membrane; microsome                                                                                                                                  |
| CG10638                       | 0.854 | 2.183 | aldehyde reductase activity                                                                                                                                                                             |
| Cyp6a2                        | 0.812 | 2.194 | cytochrome P450 activity; membrane; microsome; response to insecticide                                                                                                                                  |

|                                            |       |       |                                                                                                                                                                                                                                                                                                                                                                                                                                                                                                                                |
|--------------------------------------------|-------|-------|--------------------------------------------------------------------------------------------------------------------------------------------------------------------------------------------------------------------------------------------------------------------------------------------------------------------------------------------------------------------------------------------------------------------------------------------------------------------------------------------------------------------------------|
| CG8446                                     | 0.811 | 2.203 | lipoyltransferase activity                                                                                                                                                                                                                                                                                                                                                                                                                                                                                                     |
| CG7724                                     | 0.807 | 2.088 | oxidoreductase activity, acting on CH-OH group of donors                                                                                                                                                                                                                                                                                                                                                                                                                                                                       |
| Peroxiredoxin 2540                         | 0.805 | 2.826 | antioxidant activity; non-selenium glutathione peroxidase activity; peroxidase activity                                                                                                                                                                                                                                                                                                                                                                                                                                        |
| CG9436                                     | 0.778 | 2.101 | aldehyde reductase activity                                                                                                                                                                                                                                                                                                                                                                                                                                                                                                    |
| CG9265                                     | 0.777 | 2.012 | oxidoreductase activity, acting on CH-OH group of donors                                                                                                                                                                                                                                                                                                                                                                                                                                                                       |
| Cyp4d20                                    | 0.763 | 2.180 | cytochrome P450 activity; membrane; microsome                                                                                                                                                                                                                                                                                                                                                                                                                                                                                  |
| l(3)neo18                                  | 0.759 | 2.005 | NADH dehydrogenase (ubiquinone) activity; NADH dehydrogenase activity; mitochondrial electron transport, NADH to ubiquinone; respiratory chain complex I (sensu Eukarya)                                                                                                                                                                                                                                                                                                                                                       |
| CG4769                                     | 0.745 | 2.057 | electron transporter, transferring electrons within CoQH2-cytochrome c reductase complex activity; mitochondrial electron transport, ubiquinol to cytochrome c; oxidative phosphorylation; ubiquinol-cytochrome-c reductase complex (sensu Eukarya)                                                                                                                                                                                                                                                                            |
|                                            |       |       |                                                                                                                                                                                                                                                                                                                                                                                                                                                                                                                                |
| <b>Signaling Molecules</b>                 |       |       |                                                                                                                                                                                                                                                                                                                                                                                                                                                                                                                                |
| <b>Acetylcholine synthesis</b>             |       |       |                                                                                                                                                                                                                                                                                                                                                                                                                                                                                                                                |
| CG12345+CG32848                            | 0.698 | 2.504 | Choline acetyltransferase                                                                                                                                                                                                                                                                                                                                                                                                                                                                                                      |
| <b>Adenosine signaling</b>                 |       |       |                                                                                                                                                                                                                                                                                                                                                                                                                                                                                                                                |
| CG4802                                     | 0.856 | 2.224 | 5'-methylthioadenosine phosphorylase activity; cellular_component unknown; phosphorylation                                                                                                                                                                                                                                                                                                                                                                                                                                     |
| CG11255                                    | 0.742 | 2.015 | adenosine kinase activity                                                                                                                                                                                                                                                                                                                                                                                                                                                                                                      |
| <b>Dopamine synthesis/metabolism</b>       |       |       |                                                                                                                                                                                                                                                                                                                                                                                                                                                                                                                                |
| Dat                                        | 0.839 | 2.116 | aralkylamine N-acetyltransferase activity; arylamine N-acetyltransferase activity; behavior; biogenic amine catabolism; catecholamine metabolism; dopamine catabolism; octopamine catabolism; regulation of circadian sleep/wake cycle, sleep; serotonin catabolism; sleep                                                                                                                                                                                                                                                     |
| ebony                                      | 0.730 | 2.120 | beta-alanyl-dopamine synthase activity; circadian rhythm; cuticle pigmentation; cuticle tanning; dopamine metabolism; locomotor rhythm; negative regulation of melanin biosynthesis; pigment metabolism                                                                                                                                                                                                                                                                                                                        |
| <b>GTP-binding/GTPase</b>                  |       |       |                                                                                                                                                                                                                                                                                                                                                                                                                                                                                                                                |
| ran                                        | 1.283 | 3.250 | RAN small monomeric GTPase activity; Ras GTPase superfamily                                                                                                                                                                                                                                                                                                                                                                                                                                                                    |
| RhoGAP88C                                  | 1.090 | 2.922 | Rho GTPase activator activity                                                                                                                                                                                                                                                                                                                                                                                                                                                                                                  |
| CG30115                                    | 1.065 | 2.558 | guanyl-nucleotide exchange factor activity                                                                                                                                                                                                                                                                                                                                                                                                                                                                                     |
| sprint                                     | 0.937 | 2.406 | Ras interactor activity; cellular_component unknown; endocytosis                                                                                                                                                                                                                                                                                                                                                                                                                                                               |
| drongo                                     | 0.877 | 2.793 | small GTPase regulatory/interacting protein activity                                                                                                                                                                                                                                                                                                                                                                                                                                                                           |
| Rab11                                      | 0.730 | 2.173 | GTP binding; RAB small monomeric GTPase activity; Rho small monomeric GTPase activity; endocytosis; oocyte microtubule cytoskeleton polarization; regulation of pole plasm oskar mRNA localization                                                                                                                                                                                                                                                                                                                             |
| CG8801                                     | 0.667 | 2.043 | GTP binding; nucleus                                                                                                                                                                                                                                                                                                                                                                                                                                                                                                           |
| Misexpression suppressor of ras 3          | 0.621 | 2.140 |                                                                                                                                                                                                                                                                                                                                                                                                                                                                                                                                |
| <b>G-protein Receptor/ Other receptors</b> |       |       |                                                                                                                                                                                                                                                                                                                                                                                                                                                                                                                                |
| kekkon-3                                   | 1.888 | 9.344 | G-Protein coupled receptor activity; Immunoglobulin and major histocompatibility complex domain                                                                                                                                                                                                                                                                                                                                                                                                                                |
| scab                                       | 1.726 | 6.559 | calcium-dependent cell adhesion molecule activity; calcium-dependent cell-matrix adhesion; cell adhesion receptor activity; cell migration; cell-matrix adhesion; dorsal closure; focal adhesion; heterophilic cell adhesion; integral to membrane; integrin complex; laminin receptor activity; learning and/or memory; locomotion; memory; midgut development; olfactory learning; plasma membrane; salivary gland development; short-term memory; structural molecule activity; tracheal system development (sensu Insecta) |
| CG11155                                    | 1.603 | 6.361 | kainate selective glutamate receptor activity                                                                                                                                                                                                                                                                                                                                                                                                                                                                                  |
| Gonadotropin-releasing hormone receptor    | 1.450 | 7.464 |                                                                                                                                                                                                                                                                                                                                                                                                                                                                                                                                |
| Nmda1                                      | 1.343 | 4.261 | N-methyl-D-aspartate selective glutamate receptor activity; N-methyl-D-aspartate selective glutamate receptor complex                                                                                                                                                                                                                                                                                                                                                                                                          |

|                               |       |       |                                                                                                                                                                                                                                                                                                                                                                 |
|-------------------------------|-------|-------|-----------------------------------------------------------------------------------------------------------------------------------------------------------------------------------------------------------------------------------------------------------------------------------------------------------------------------------------------------------------|
| cryptochrome                  | 1.178 | 3.119 |                                                                                                                                                                                                                                                                                                                                                                 |
| downstream of receptor kinase | 1.169 | 4.076 | RAS protein signal transduction; SH3/SH2 adaptor protein activity; determination of anterior/posterior axis, embryo; memory; olfactory learning; plasma membrane; sevenless signaling pathway; torso signaling pathway                                                                                                                                          |
| Neuroglian                    | 1.127 | 3.367 | EGF receptor signaling pathway; cell adhesion molecule activity; central complex development; lateral plasma membrane; mushroom body development; neuronal cell adhesion; plasma membrane                                                                                                                                                                       |
| Kekkon-4                      | 1.028 | 2.569 | Immunoglobulin and major histocompatibility complex domain, Immunoglobulin C-2 type                                                                                                                                                                                                                                                                             |
| CG31221                       | 1.022 | 3.062 | lipoprotein receptor activity                                                                                                                                                                                                                                                                                                                                   |
| inflated                      | 1.013 | 2.994 | cell adhesion receptor activity; cell migration; cell-cell adhesion; cell-matrix adhesion; heterophilic cell adhesion; integrin complex; maintenance of protein localization; midgut development; muscle attachment; muscle fiber; myofibril assembly; protein binding; salivary gland development; tracheal cell migration (sensu Insecta); wing morphogenesis |
| neuropeptide F receptor       | 0.988 | 2.554 |                                                                                                                                                                                                                                                                                                                                                                 |
| roughoid                      | 0.937 | 2.550 | EGF receptor signaling pathway; cone cell fate commitment (sensu Drosophila); integral to membrane; integral to plasma membrane; leg disc proximal/distal pattern formation; photoreceptor fate commitment (sensu Drosophila); plasma membrane; serine-type peptidase activity                                                                                  |
| Activin Like Protein at 23B   | 0.886 | 2.525 | transforming growth factor-beta receptor binding                                                                                                                                                                                                                                                                                                                |
| Keren                         | 0.792 | 2.063 | EGF receptor signaling pathway; MAPKKK cascade; epidermal growth factor receptor binding; growth factor activity; plasma membrane; positive regulation of EGF receptor activity                                                                                                                                                                                 |
| CG31072                       | 0.743 | 2.006 | receptor activity                                                                                                                                                                                                                                                                                                                                               |
| CG4684                        | 0.713 | 2.024 | SH3/SH2 adaptor protein activity                                                                                                                                                                                                                                                                                                                                |
| strawberry notch              | 0.706 | 2.410 | EGF receptor signaling pathway; N signaling pathway; cone cell fate commitment (sensu Drosophila); embryonic development; female gamete generation; imaginal disc morphogenesis; nucleus; positive regulation of transcription from Pol II promoter; regulation of proteolysis and peptidolysis; wing margin morphogenesis                                      |
| decapentaplegic               | 0.588 | 2.074 | BMP signaling pathway; TGFbeta receptor signaling pathway                                                                                                                                                                                                                                                                                                       |
| <b>Kinases</b>                |       |       |                                                                                                                                                                                                                                                                                                                                                                 |
| CG31640                       | 1.585 | 5.857 | receptor signaling protein tyrosine kinase activity; signal transduction                                                                                                                                                                                                                                                                                        |
| CG13369                       | 1.425 | 4.131 | ribokinase activity                                                                                                                                                                                                                                                                                                                                             |
| Selenophosphate synthetase 2  | 1.399 | 4.629 | purine nucleotide binding; selenide, water dikinase activity; selenocysteine biosynthesis                                                                                                                                                                                                                                                                       |
| Fps oncogene analog           | 1.314 | 6.512 | protein tyrosine kinase activity; photoreceptor cell morphogenesis                                                                                                                                                                                                                                                                                              |
| Cyclin D                      | 1.267 | 3.741 |                                                                                                                                                                                                                                                                                                                                                                 |
| Downstream of raf1            | 1.188 | 3.554 | EGF receptor signaling pathway; MAP kinase activity; MAP kinase kinase activity; MAPKKK cascade                                                                                                                                                                                                                                                                 |
| Cad96Ca                       | 1.104 | 3.010 | calcium-dependent cell adhesion molecule activity; calcium-dependent cell-cell adhesion; cellular_component unknown; integral to plasma membrane; protein amino acid phosphorylation; protein kinase activity; protein-tyrosine kinase activity; transmembrane receptor protein tyrosine kinase activity                                                        |
| center divider                | 0.959 | 4.079 | protein amino acid phosphorylation; protein kinase activity; protein serine/threonine kinase activity                                                                                                                                                                                                                                                           |
| Adenylate kinase-1            | 0.943 | 2.350 |                                                                                                                                                                                                                                                                                                                                                                 |
| sevenless                     | 0.890 | 2.365 | R7 cell fate commitment; R7 development; boss receptor activity; determination of anterior/posterior axis, embryo; plasma membrane; protein amino acid phosphorylation; protein-tyrosine kinase activity; torso signaling pathway; transmembrane receptor protein tyrosine kinase activity                                                                      |
| Phosphofructokinase           | 0.694 | 2.076 | 6-phosphofructokinase activity; glycolysis                                                                                                                                                                                                                                                                                                                      |
| CG10967                       | 0.610 | 2.064 | receptor signaling protein serine/threonine kinase activity                                                                                                                                                                                                                                                                                                     |
| <b>Phosphatase</b>            |       |       |                                                                                                                                                                                                                                                                                                                                                                 |
| CG9449                        | 1.312 | 3.437 | acid phosphatase activity                                                                                                                                                                                                                                                                                                                                       |
| Protein phosphatase 2B at 14D | 1.283 | 5.302 | calcineurin complex; calcium-dependent protein serine/threonine phosphatase activity; calmodulin binding; protein amino acid dephosphorylation; protein serine/threonine phosphatase activity                                                                                                                                                                   |

|                                                   |       |       |                                                                                                                                                                                                                                                                                                                                                                                                                                                                                                           |
|---------------------------------------------------|-------|-------|-----------------------------------------------------------------------------------------------------------------------------------------------------------------------------------------------------------------------------------------------------------------------------------------------------------------------------------------------------------------------------------------------------------------------------------------------------------------------------------------------------------|
| Protein tyrosine phosphatase 61F                  | 1.170 | 4.687 | axon guidance; cytoplasm; nucleus; protein amino acid dephosphorylation; protein-tyrosine-phosphatase activity                                                                                                                                                                                                                                                                                                                                                                                            |
| CG7042                                            | 1.078 | 3.090 | protein tyrosine/serine/threonine phosphatase activity                                                                                                                                                                                                                                                                                                                                                                                                                                                    |
| CG1846                                            | 0.994 | 2.725 | inositol-1,3,4-trisphosphate 4-phosphatase activity; phosphatidylinositol-3,4,5-trisphosphate 3-phosphatase activity; phosphatidylinositol-3,4-bisphosphate 4-phosphatase activity                                                                                                                                                                                                                                                                                                                        |
| CG3530                                            | 0.990 | 2.928 | protein amino acid dephosphorylation; protein tyrosine/serine/threonine phosphatase activity                                                                                                                                                                                                                                                                                                                                                                                                              |
| Multiple inositol polyphosphate phosphatase 1     | 0.892 | 2.520 | inositol/phosphatidylinositol phosphatase activity; phosphoprotein phosphatase activity                                                                                                                                                                                                                                                                                                                                                                                                                   |
| Ptpmeg                                            | 0.642 | 2.090 | cytoskeletal protein binding; protein-tyrosine-phosphatase activity                                                                                                                                                                                                                                                                                                                                                                                                                                       |
| Protein tyrosine phosphatase-ERK/Enhancer of Ras1 | 0.609 | 2.145 | R7 cell fate commitment; RAS protein signal transduction; cytoplasm; inactivation of MAPK; protein amino acid dephosphorylation; protein-tyrosine-phosphatase activity                                                                                                                                                                                                                                                                                                                                    |
| <b>Ion Channel</b>                                |       |       |                                                                                                                                                                                                                                                                                                                                                                                                                                                                                                           |
| inx2                                              | 1.672 | 8.328 | gap junction; innexin channel activity; integral to membrane                                                                                                                                                                                                                                                                                                                                                                                                                                              |
| nAcRalpha-18C                                     | 1.364 | 6.104 | nicotinic acetylcholine-activated cation-selective channel activity; nicotinic acetylcholine-gated receptor-channel complex                                                                                                                                                                                                                                                                                                                                                                               |
| SK                                                | 1.214 | 3.153 | small conductance calcium-activated potassium channel                                                                                                                                                                                                                                                                                                                                                                                                                                                     |
| CG31116                                           | 0.831 | 2.815 | chloride channel activity; chloride transport                                                                                                                                                                                                                                                                                                                                                                                                                                                             |
| cacophony                                         | 0.731 | 2.847 | apical plasma membrane; basolateral plasma membrane; calcium ion transport; courtship behavior; epithelial fluid transport; male courtship behavior (sensu Insecta), song production; phototransduction; visual behavior; voltage-gated calcium channel activity; voltage-gated calcium channel complex                                                                                                                                                                                                   |
| <b>Calcium Ion Binding</b>                        |       |       |                                                                                                                                                                                                                                                                                                                                                                                                                                                                                                           |
| CG10022                                           | 1.232 | 3.387 | calcium ion binding                                                                                                                                                                                                                                                                                                                                                                                                                                                                                       |
| Amylase distal                                    | 1.060 | 3.501 | alpha-amylase activity; calcium ion binding                                                                                                                                                                                                                                                                                                                                                                                                                                                               |
| Troponin C at 73F                                 | 0.965 | 2.505 |                                                                                                                                                                                                                                                                                                                                                                                                                                                                                                           |
| CG17272                                           | 0.772 | 2.145 |                                                                                                                                                                                                                                                                                                                                                                                                                                                                                                           |
| Glutactin                                         | 0.701 | 2.073 | basement membrane; calcium ion binding                                                                                                                                                                                                                                                                                                                                                                                                                                                                    |
| CG17271                                           | 0.691 | 2.100 |                                                                                                                                                                                                                                                                                                                                                                                                                                                                                                           |
| Calpain-B                                         | 0.602 | 2.057 | calpain activity                                                                                                                                                                                                                                                                                                                                                                                                                                                                                          |
| Nckx30C                                           | 0.574 | 2.031 | calcium ion transport; calcium, potassium:sodium antiporter activity; eye morphogenesis (sensu Drosophila); integral to membrane                                                                                                                                                                                                                                                                                                                                                                          |
| <b>Cell-cell signaling/neurotransmission</b>      |       |       |                                                                                                                                                                                                                                                                                                                                                                                                                                                                                                           |
| Pigment-dispersing factor                         | 1.197 | 2.913 | circadian rhythm; eclosion rhythm; gravitactic behavior; locomotor rhythm; neuropeptide hormone activity; neuropeptide signaling pathway                                                                                                                                                                                                                                                                                                                                                                  |
| ubisnap                                           | 0.921 | 2.276 | neurotransmitter secretion; soluble NSF attachment protein activity; synaptic vesicle fusion; t-SNARE activity; vesicle-mediated transport                                                                                                                                                                                                                                                                                                                                                                |
| Allatostatin 2                                    | 0.867 | 2.251 | hormone activity; neuropeptide hormone activity; neuropeptide signaling pathway; regulation of heart rate                                                                                                                                                                                                                                                                                                                                                                                                 |
| Odorant-binding protein 99b                       | 0.761 | 2.291 |                                                                                                                                                                                                                                                                                                                                                                                                                                                                                                           |
| Syntaxin 6                                        | 0.712 | 2.264 | neurotransmitter secretion; plasma membrane; synaptic vesicle docking; synaptic vesicle fusion; t-SNARE activity                                                                                                                                                                                                                                                                                                                                                                                          |
| Accessory gland peptide 63F                       | 0.628 | 2.060 | physiological process; post-mating behavior                                                                                                                                                                                                                                                                                                                                                                                                                                                               |
| CG5958                                            | 0.833 | 2.350 | retinal binding                                                                                                                                                                                                                                                                                                                                                                                                                                                                                           |
| <b>Transcription Factor, DNA/RNA Binding</b>      |       |       |                                                                                                                                                                                                                                                                                                                                                                                                                                                                                                           |
| CG9104                                            | 1.547 | 4.945 | nucleus; transcription factor activity                                                                                                                                                                                                                                                                                                                                                                                                                                                                    |
| bicaudal                                          | 1.545 | 4.460 | nascent polypeptide-associated complex; transcription factor activity                                                                                                                                                                                                                                                                                                                                                                                                                                     |
| anterior open                                     | 1.485 | 4.660 | JNK cascade; MAPKKK cascade; R7 development; cell fate determination; dorsal closure; induction of apoptosis; negative regulation of RAS protein signal transduction; negative regulation of cell differentiation; negative regulation of eye photoreceptor development (sensu Drosophila); negative regulation of photoreceptor differentiation (sensu Drosophila); nucleus; specific RNA polymerase II transcription factor activity; transcription factor activity; transcriptional repressor activity |

|                                                |       |        |                                                                                                                                                                                                                                                                                                                                                                                                                                                                                                          |
|------------------------------------------------|-------|--------|----------------------------------------------------------------------------------------------------------------------------------------------------------------------------------------------------------------------------------------------------------------------------------------------------------------------------------------------------------------------------------------------------------------------------------------------------------------------------------------------------------|
| Smn                                            | 1.334 | 3.445  | survival motor neuron                                                                                                                                                                                                                                                                                                                                                                                                                                                                                    |
| Sox100B                                        | 1.303 | 13.831 | Regulation of transcription from Pol II promoter; sex determination                                                                                                                                                                                                                                                                                                                                                                                                                                      |
| Heterogeneous nuclear ribonucleoprotein at 87F | 1.271 | 7.200  | RNA binding; chromatin; heterogeneous nuclear ribonucleoprotein complex; nuclear speck; nucleoplasm; nucleus; ribonucleoprotein complex                                                                                                                                                                                                                                                                                                                                                                  |
| RNA-binding protein 4F                         | 1.181 | 3.251  | RNA binding                                                                                                                                                                                                                                                                                                                                                                                                                                                                                              |
| Mat1                                           | 1.162 | 4.141  | general RNA polymerase II transcription factor activity; transcription factor TFIIF complex; transcription initiation from Pol II promoter                                                                                                                                                                                                                                                                                                                                                               |
| ventral veins lacking                          | 1.125 | 3.641  | DNA binding; RNA polymerase II transcription factor activity; dendrite morphogenesis; nucleus; peripheral nervous system development; protein binding; regulation of transcription, DNA-dependent; tracheal cell fate determination (sensu Insecta)                                                                                                                                                                                                                                                      |
| E(spl) region transcript mbeta                 | 1.125 | 2.819  | DNA binding; N signaling pathway; eye morphogenesis (sensu Drosophila); negative regulation of transcription; neurogenesis; nucleus; specific transcriptional repressor activity; transcription factor activity                                                                                                                                                                                                                                                                                          |
| CG5728                                         | 1.088 | 2.772  | RNA binding; nucleolus; rRNA processing                                                                                                                                                                                                                                                                                                                                                                                                                                                                  |
| lola like                                      | 1.044 | 3.442  | nucleus; regulation of transcription from Pol II promoter; specific RNA polymerase II transcription factor activity                                                                                                                                                                                                                                                                                                                                                                                      |
| Jun-related antigen                            | 0.953 | 2.299  | JNK cascade; MAPKKK cascade; R3/R4 cell fate commitment; R7 cell fate commitment; RNA polymerase II transcription factor activity; cytoplasm; dorsal appendage formation; dorsal closure; establishment of planar polarity; micropyle formation; nucleus; protein heterodimerization activity; regulation of transcription from Pol II promoter; specific RNA polymerase II transcription factor activity; transcription factor binding                                                                  |
| CG15636                                        | 0.945 | 2.724  | DNA binding; nucleus                                                                                                                                                                                                                                                                                                                                                                                                                                                                                     |
| Optix                                          | 0.942 | 2.533  | DNA binding; RNA polymerase II transcription factor activity; eye morphogenesis (sensu Drosophila); nucleus; transcription factor activity                                                                                                                                                                                                                                                                                                                                                               |
| 48 related 1                                   | 0.909 | 2.401  | nucleus; regulation of transcription; transcription factor activity                                                                                                                                                                                                                                                                                                                                                                                                                                      |
| glass                                          | 0.905 | 3.215  | eye photoreceptor development (sensu Drosophila); nucleus; photoreceptor fate commitment (sensu Drosophila); specific RNA polymerase II transcription factor activity; transcription factor activity                                                                                                                                                                                                                                                                                                     |
| dalao                                          | 0.871 | 2.422  | DNA binding; chromatin remodeling; chromatin remodeling complex; general RNA polymerase II transcription factor activity; nucleosome remodeling complex; nucleus                                                                                                                                                                                                                                                                                                                                         |
| Small ribonucleoprotein particle protein B     | 0.868 | 2.194  | RNA metabolism; mRNA splicing; nucleus; small nuclear ribonucleoprotein complex; spliceosome complex                                                                                                                                                                                                                                                                                                                                                                                                     |
| Mes4                                           | 0.865 | 2.201  | nucleus; transcription factor activity                                                                                                                                                                                                                                                                                                                                                                                                                                                                   |
| pipsqueak                                      | 0.859 | 3.191  | DNA binding; nucleus; pole plasm assembly                                                                                                                                                                                                                                                                                                                                                                                                                                                                |
| hairy                                          | 0.840 | 2.289  | bristle morphogenesis; general transcriptional repressor activity; membrane organization and biogenesis; negative regulation of transcription; negative regulation of transcription from Pol II promoter; negative regulation of transcription, DNA-dependent; nucleus; periodic partitioning by pair rule gene; restriction of R8 fate; salivary gland development; salivary gland morphogenesis; specific RNA polymerase II transcription factor activity; specific transcriptional repressor activity |
| modulo                                         | 0.819 | 2.473  | DNA binding; RNA binding; nucleus; protein binding; spermatid development                                                                                                                                                                                                                                                                                                                                                                                                                                |
| Ada2A                                          | 0.812 | 2.176  | Ada2/Gcn5/Ada3 transcription activator complex; histone acetyltransferase activity                                                                                                                                                                                                                                                                                                                                                                                                                       |
| biniou                                         | 0.805 | 2.122  | mesoderm cell fate commitment; nucleus; transcription factor activity                                                                                                                                                                                                                                                                                                                                                                                                                                    |
| Germ line transcription factor 1               | 0.798 | 2.177  | DNA binding; DNA replication; DNA replication factor C complex; nucleus                                                                                                                                                                                                                                                                                                                                                                                                                                  |
| Suppressor of variegation 205                  | 0.797 | 2.103  | centric heterochromatin; chromatin binding; chromosome, telomeric region; establishment of chromatin silencing; nuclear heterochromatin; nucleus                                                                                                                                                                                                                                                                                                                                                         |
| Nonsense-mediated mRNA 3                       | 0.794 | 2.020  | RNA binding; protein binding; ribosomal large subunit-nucleus export                                                                                                                                                                                                                                                                                                                                                                                                                                     |
| arrest                                         | 0.788 | 2.027  | RNA binding; female gamete generation; female germ-line cyst formation (sensu Insecta); germ-line stem cell division; mRNA 3' UTR binding; mRNA polyadenylation; negative regulation of oskar mRNA translation; negative regulation of translation; protein binding; regulation of oskar mRNA translation; spermatid development                                                                                                                                                                         |

|                                         |       |       |                                                                                                                                                                                                                                                                                                                                                                                                                                               |
|-----------------------------------------|-------|-------|-----------------------------------------------------------------------------------------------------------------------------------------------------------------------------------------------------------------------------------------------------------------------------------------------------------------------------------------------------------------------------------------------------------------------------------------------|
| Signal recognition particle protein 54k | 0.788 | 3.732 | 7S RNA binding; SRP-dependent cotranslational membrane targeting; SRP-dependent cotranslational membrane targeting, signal sequence recognition; signal recognition particle; signal sequence binding                                                                                                                                                                                                                                         |
| combgap                                 | 0.775 | 2.261 | nucleus; transcription factor activity; wing morphogenesis                                                                                                                                                                                                                                                                                                                                                                                    |
| CG5064                                  | 0.747 | 2.009 | 7S RNA binding; RNA binding; SRP-dependent cotranslational membrane targeting; signal recognition particle                                                                                                                                                                                                                                                                                                                                    |
| reversed polarity                       | 0.737 | 2.001 | RNA polymerase II transcription factor activity; glial cell differentiation; nucleus; regulation of transcription from Pol II promoter                                                                                                                                                                                                                                                                                                        |
| suppressor of Hairy wing                | 0.690 | 2.117 | DNA binding; nucleus                                                                                                                                                                                                                                                                                                                                                                                                                          |
| CG11386                                 | 0.603 | 2.014 | regulation of translation, structural constituent of ribosome, nucleic acid binding                                                                                                                                                                                                                                                                                                                                                           |
| <b>Nucleic Acid Metabolism</b>          |       |       |                                                                                                                                                                                                                                                                                                                                                                                                                                               |
| CG8877                                  | 1.646 | 5.734 | mRNA splicing; pre-mRNA splicing factor activity; small nuclear ribonucleoprotein complex; snRNP U5; spliceosome complex                                                                                                                                                                                                                                                                                                                      |
| Lysyl-tRNA synthetase                   | 1.593 | 8.342 | lysine-tRNA ligase activity; lysyl-tRNA aminoacylation                                                                                                                                                                                                                                                                                                                                                                                        |
| photorepair                             | 1.511 | 9.183 | DNA repair; deoxyribodipyrimidine photo-lyase activity                                                                                                                                                                                                                                                                                                                                                                                        |
| CG6418                                  | 1.405 | 3.968 | ATP dependent RNA helicase activity; helicase activity                                                                                                                                                                                                                                                                                                                                                                                        |
| CG33123                                 | 1.000 | 3.171 | leucine-tRNA ligase activity                                                                                                                                                                                                                                                                                                                                                                                                                  |
| Ski6                                    | 0.974 | 2.535 | 3'-5' exoribonuclease activity; cytoplasmic exosome (RNase complex); nuclear exosome (RNase complex); polytene chromosome                                                                                                                                                                                                                                                                                                                     |
| CG6796                                  | 0.880 | 2.204 | asparagine-tRNA ligase activity                                                                                                                                                                                                                                                                                                                                                                                                               |
| Ribonuclease X25                        | 0.873 | 2.514 | endoribonuclease activity                                                                                                                                                                                                                                                                                                                                                                                                                     |
| Seryl-tRNA synthetase                   | 0.841 | 2.094 | serine-tRNA ligase activity; seryl-tRNA aminoacylation                                                                                                                                                                                                                                                                                                                                                                                        |
| ribonuclease H1                         | 0.822 | 2.096 | ribonuclease H1 activity                                                                                                                                                                                                                                                                                                                                                                                                                      |
| CG1135                                  | 0.742 | 2.005 | nucleolus                                                                                                                                                                                                                                                                                                                                                                                                                                     |
| Helicase at 25E                         | 0.721 | 2.069 | ATP dependent RNA helicase activity; RNA helicase activity; mRNA splicing; nucleus; spliceosome complex                                                                                                                                                                                                                                                                                                                                       |
| CG10354                                 | 0.667 | 2.021 | 5'-3' exoribonuclease activity                                                                                                                                                                                                                                                                                                                                                                                                                |
| Deoxyribonuclease II                    | 0.662 | 2.066 | deoxyribonuclease II activity                                                                                                                                                                                                                                                                                                                                                                                                                 |
| <b>Cytoskeletal/Structure</b>           |       |       |                                                                                                                                                                                                                                                                                                                                                                                                                                               |
| CG5871                                  | 1.868 | 8.195 | hyaluronoglucosaminidase activity                                                                                                                                                                                                                                                                                                                                                                                                             |
| CG17052                                 | 1.639 | 5.940 | structural constituent of peritrophic membrane (sensu Insecta)                                                                                                                                                                                                                                                                                                                                                                                |
| jaguar                                  | 1.424 | 4.432 | actin binding; basal protein localization; cytoplasm; dorsal closure; endocytic vesicle; intercellular junction maintenance; membrane organization and biogenesis; microtubule associated complex; microtubule binding; motor activity; myosin; myosin ATPase activity; neuroblast cell division; non-muscle myosin; oogenesis (sensu Insecta); protein binding; pseudocleavage (sensu Insecta); spermatid development; unconventional myosin |
| CAP                                     | 1.365 | 3.788 | focal adhesion; vinculin binding                                                                                                                                                                                                                                                                                                                                                                                                              |
| SCAR                                    | 1.232 | 3.164 | actin binding; cytoskeletal regulator activity                                                                                                                                                                                                                                                                                                                                                                                                |
| CG2555                                  | 1.226 | 3.157 | structural constituent of larval cuticle (sensu Insecta)                                                                                                                                                                                                                                                                                                                                                                                      |
| I(2)06496                               | 1.216 | 3.241 | dynactin complex; microtubule-based movement                                                                                                                                                                                                                                                                                                                                                                                                  |
| CG17052                                 | 1.191 | 3.188 | structural constituent of peritrophic membrane (sensu Insecta)                                                                                                                                                                                                                                                                                                                                                                                |
| cheerio                                 | 1.186 | 3.071 | actin binding; determination of adult life span                                                                                                                                                                                                                                                                                                                                                                                               |
| spire                                   | 1.136 | 3.204 | actin binding; actin cytoskeleton organization and biogenesis; eggshell formation (sensu Insecta); female gamete generation; pole plasm RNA localization; pole plasm assembly; pole plasm assembly (sensu Insecta); pole plasm oskar mRNA localization                                                                                                                                                                                        |
| CG11142                                 | 1.126 | 2.938 | structural constituent of peritrophic membrane (sensu Insecta)                                                                                                                                                                                                                                                                                                                                                                                |
| Ank2                                    | 1.109 | 5.469 | cytoskeletal anchoring; cytoskeletal protein binding; plasma membrane; structural constituent of cytoskeleton                                                                                                                                                                                                                                                                                                                                 |
| Actin 42A                               | 1.079 | 3.134 | actin filament; cytoskeleton organization and biogenesis; structural constituent of cytoskeleton                                                                                                                                                                                                                                                                                                                                              |
| Tropomyosin 1                           | 1.033 | 2.811 | actin binding                                                                                                                                                                                                                                                                                                                                                                                                                                 |
| Caldesmon-related protein               | 1.012 | 2.663 | structural molecule activity                                                                                                                                                                                                                                                                                                                                                                                                                  |
| Gaspl                                   | 1.009 | 3.035 | chitin binding; structural constituent of peritrophic membrane (sensu Insecta)                                                                                                                                                                                                                                                                                                                                                                |

|                                |              |              |                                                                                                                                                               |
|--------------------------------|--------------|--------------|---------------------------------------------------------------------------------------------------------------------------------------------------------------|
| CG33171                        | 0.968        | 3.384        | collagen                                                                                                                                                      |
| CG7970                         | 0.922        | 2.333        | peroxisomal membrane                                                                                                                                          |
| <b>Ccp84Ab</b>                 | <b>0.872</b> | <b>3.811</b> | <b>structural constituent of larval cuticle (sensu Insecta)</b>                                                                                               |
| Actin 88F                      | 0.860        | 3.983        | actin filament; cytoskeleton organization and biogenesis; structural constituent of cytoskeleton                                                              |
| CG8505                         | 0.857        | 2.390        | structural constituent of cuticle (sensu Insecta)                                                                                                             |
| Ecdysone-dependent gene 91     | 0.852        | 2.401        | structural constituent of pupal cuticle (sensu Insecta)                                                                                                       |
| zormin                         | 0.807        | 2.259        | structural constituent of cytoskeleton                                                                                                                        |
| Chd64                          | 0.783        | 2.193        | actin binding                                                                                                                                                 |
| CG13935                        | 0.772        | 2.103        | structural constituent of cuticle (sensu Insecta)                                                                                                             |
| Paramyosin                     | 0.747        | 2.022        | striated muscle thick filament; structural constituent of muscle                                                                                              |
| Tiggrin                        | 0.746        | 2.209        | binding; extracellular matrix                                                                                                                                 |
| steamer duck                   | 0.741        | 2.104        | structural constituent of cytoskeleton                                                                                                                        |
| upheld                         | 0.729        | 2.112        | tropomyosin binding; troponin complex                                                                                                                         |
| CG10323                        | 0.719        | 2.217        | cell adhesion molecule activity; extracellular matrix; structural molecule activity                                                                           |
| nuclear fallout                | 0.698        | 2.567        | centrosome; cytokinesis, actomyosin ring formation; microtubule associated complex; microtubule binding; microtubule-based process                            |
| viking                         | 0.645        | 2.055        | collagen; collagen type IV                                                                                                                                    |
|                                |              |              |                                                                                                                                                               |
| <b>Transporter Activity</b>    |              |              |                                                                                                                                                               |
| CG2158                         | 1.583        | 4.838        | nuclear pore                                                                                                                                                  |
| CG13248                        | 1.276        | 3.689        | cationic amino acid transporter activity                                                                                                                      |
| CG9887                         | 1.239        | 4.149        | high affinity inorganic phosphate:sodium symporter activity                                                                                                   |
| Tim8                           | 1.199        | 3.266        | mitochondrial inner membrane presequence translocase complex; protein translocase activity; protein transport; protein-mitochondrial targeting                |
| CG3071                         | 1.196        | 3.466        | COPI vesicle coat; retrograde (Golgi to ER) transport                                                                                                         |
| Nhe2                           | 1.158        | 3.578        | regulation of pH; sodium:hydrogen antiporter activity                                                                                                         |
| CG14694                        | 1.147        | 3.303        | reduced folate carrier activity                                                                                                                               |
| deltaCOP                       | 1.121        | 3.263        | COPI vesicle coat; retrograde (Golgi to ER) transport                                                                                                         |
| Vha68-1                        | 1.106        | 3.374        | hydrogen-exporting ATPase activity, phosphorylative mechanism; hydrogen-transporting ATPase V1 domain; proton transport                                       |
| CG17646                        | 1.062        | 3.618        | ATP-binding cassette (ABC) transporter activity                                                                                                               |
| CG4288                         | 0.939        | 2.593        | high affinity inorganic phosphate:sodium symporter activity                                                                                                   |
| CG31085                        | 0.908        | 2.990        | ATP-binding cassette (ABC) transporter activity; transport                                                                                                    |
| CG8860                         | 0.869        | 2.182        | SRP-dependent cotranslational membrane targeting, translocation; protein transporter activity; translocon                                                     |
| CG6070                         | 0.822        | 2.041        | amino acid transporter activity                                                                                                                               |
| Jhl-21                         | 0.770        | 2.120        | L-amino acid transporter activity; amino acid transporter activity                                                                                            |
| Zip3                           | 0.764        | 2.019        | Zinc/iron regulated transporter-related protein 3                                                                                                             |
| CG8219                         | 0.752        | 2.097        | nuclear pore; protein carrier activity; protein-nucleus import                                                                                                |
| no mechanoreceptor potential B | 0.741        | 2.032        | hearing; intraflagellar transport                                                                                                                             |
| vibrator                       | 0.693        | 2.018        | phosphatidylinositol binding; phospholipid transporter activity                                                                                               |
| CG11897                        | 0.682        | 2.020        | multidrug transporter activity; xenobiotic-transporting ATPase activity                                                                                       |
| CG6126                         | 0.673        | 2.112        | organic cation transporter activity                                                                                                                           |
| CG3252                         | 0.671        | 2.025        | integral to membrane; neurotransmitter transport; neurotransmitter:sodium symporter activity; potassium:amino acid transporter activity; sodium ion transport |
| Transportin                    | 0.648        | 2.042        | nuclear pore; protein carrier activity; protein-nucleus import                                                                                                |
| Eaat1                          | 0.606        | 2.135        | Excitatory amino acid transporter 1                                                                                                                           |
|                                |              |              |                                                                                                                                                               |
| <b>Development</b>             |              |              |                                                                                                                                                               |
| Nucleolar protein at 60B       | 1.990        | 10.416       | germ-cell development; nucleolus; nucleus; pseudouridylylase synthase activity; rRNA processing                                                               |
| Laminin B1                     | 1.795        | 10.096       | basal lamina; basement membrane; embryonic morphogenesis; histogenesis; organogenesis                                                                         |
| modifier of rudimentary        | 1.637        | 5.322        |                                                                                                                                                               |



|                               |              |              |                                                                                                                                                                                                 |
|-------------------------------|--------------|--------------|-------------------------------------------------------------------------------------------------------------------------------------------------------------------------------------------------|
| Cad87A                        | 1.391        | 4.753        | calcium-dependent cell adhesion molecule activity; calcium-dependent cell-cell adhesion; integral to membrane; integral to plasma membrane                                                      |
| Brother                       | 1.342        | 4.611        | core-binding factor complex; eye morphogenesis (sensu Drosophila); nucleus; regulation of transcription from Pol II promoter; transcription coactivator activity                                |
| lethal (2) 37Cc               | 1.221        | 3.548        | larval/pupal development (sensu Insecta); mitochondrial membrane; mitochondrion                                                                                                                 |
| Ecdysone-inducible gene L2    | 1.159        | 3.035        | cell adhesion; cell adhesion molecule activity; extracellular                                                                                                                                   |
| roughex                       | 1.085        | 2.762        | eye morphogenesis (sensu Drosophila); eye-antennal disc metamorphosis; mitotic cell cycle; nucleus; regulation of cell cycle; regulation of meiosis; regulation of mitosis                      |
| Yolk protein 2                | 0.994        | 2.580        | female gamete generation; sex differentiation; structural molecule activity; vitellogenesis                                                                                                     |
| Imaginal disc growth factor 2 | 0.862        | 2.371        | NOT chitinase activity; extracellular; imaginal disc growth factor activity                                                                                                                     |
| Nedd2-like caspase            | 0.855        | 2.104        | NOT mitochondrion; apoptosis; apoptotic program; caspase activity; cytoplasm; embryonic development (sensu Insecta); metamorphosis (sensu Insecta); regulation of retinal programmed cell death |
| retina aberrant in pattern    | 0.770        | 2.071        | cyclin catabolism                                                                                                                                                                               |
| dreadlocks                    | 0.750        | 2.631        | SH3/SH2 adaptor protein activity; axon guidance; axonogenesis                                                                                                                                   |
| Muscle LIM protein at 84B     | 0.748        | 2.153        | cell differentiation; cytoplasm; myogenesis; nucleus; protein binding                                                                                                                           |
| gustavus                      | 0.736        | 2.574        | dorsal appendage formation; oocyte anterior/posterior axis determination                                                                                                                        |
| Iris                          | 0.666        | 2.019        | female gamete generation                                                                                                                                                                        |
|                               |              |              |                                                                                                                                                                                                 |
| <b>Other/Unknown</b>          |              |              |                                                                                                                                                                                                 |
| CG30412                       | 1.855        | 7.826        |                                                                                                                                                                                                 |
| CG33206                       | 1.801        | 10.610       |                                                                                                                                                                                                 |
| CG8155                        | 1.784        | 7.889        |                                                                                                                                                                                                 |
| CG14959                       | 1.770        | 6.800        |                                                                                                                                                                                                 |
| CG10662                       | 1.762        | 8.162        |                                                                                                                                                                                                 |
| CG32954                       | 1.731        | 12.569       |                                                                                                                                                                                                 |
| CG9839                        | 1.727        | 5.788        |                                                                                                                                                                                                 |
| CG10560                       | 1.712        | 7.710        |                                                                                                                                                                                                 |
| CG17906                       | 1.706        | 7.447        |                                                                                                                                                                                                 |
| CG15197                       | 1.706        | 6.354        |                                                                                                                                                                                                 |
| CG8336                        | 1.705        | 8.382        |                                                                                                                                                                                                 |
| CG31052                       | 1.705        | 5.643        |                                                                                                                                                                                                 |
| CG17349                       | 1.691        | 5.872        |                                                                                                                                                                                                 |
| CG31203                       | 1.690        | 5.719        |                                                                                                                                                                                                 |
| CG5739                        | 1.677        | 8.181        |                                                                                                                                                                                                 |
| CG1148                        | 1.644        | 6.442        |                                                                                                                                                                                                 |
| CG13321                       | 1.642        | 6.495        |                                                                                                                                                                                                 |
| CG30387                       | 1.614        | 6.481        |                                                                                                                                                                                                 |
| CG32687                       | 1.613        | 5.536        |                                                                                                                                                                                                 |
| CG13565                       | 1.605        | 5.480        |                                                                                                                                                                                                 |
| CG6115                        | 1.599        | 5.363        |                                                                                                                                                                                                 |
| CG30493                       | 1.598        | 5.198        |                                                                                                                                                                                                 |
| CG31150                       | 1.596        | 5.890        |                                                                                                                                                                                                 |
| CG18779                       | 1.595        | 6.640        |                                                                                                                                                                                                 |
| <b>CG5791</b>                 | <b>1.593</b> | <b>5.418</b> |                                                                                                                                                                                                 |
| CG12316                       | 1.584        | 6.390        |                                                                                                                                                                                                 |
| CG10082                       | 1.572        | 5.747        |                                                                                                                                                                                                 |
| CG2277                        | 1.563        | 6.346        |                                                                                                                                                                                                 |
| CG14084                       | 1.501        | 4.860        |                                                                                                                                                                                                 |
| CG3625                        | 1.496        | 6.871        |                                                                                                                                                                                                 |
| CG15890                       | 1.470        | 4.611        |                                                                                                                                                                                                 |
| CG1501                        | 1.464        | 4.972        |                                                                                                                                                                                                 |
| CG8204                        | 1.459        | 3.981        |                                                                                                                                                                                                 |
| CG9034                        | 1.454        | 4.445        |                                                                                                                                                                                                 |

|                                            |              |              |              |
|--------------------------------------------|--------------|--------------|--------------|
| CG5458                                     | 1.443        | 4.776        |              |
| CG9318                                     | 1.427        | 5.231        |              |
| CG8793                                     | 1.420        | 4.067        |              |
| CG5783                                     | 1.384        | 4.792        |              |
| CG13601                                    | 1.353        | 4.131        |              |
| CG14419                                    | 1.340        | 3.623        |              |
| CG13384                                    | 1.339        | 4.316        |              |
| CG13999                                    | 1.333        | 3.803        |              |
| CG32016                                    | 1.325        | 5.023        |              |
| CG18166                                    | 1.302        | 4.438        |              |
| CG2614                                     | 1.293        | 3.420        |              |
| <b>CG16772</b>                             | <b>1.292</b> | <b>3.343</b> |              |
| CG7567                                     | 1.289        | 3.844        |              |
| CG18162                                    | 1.235        | 3.418        |              |
| CG17492                                    | 1.232        | 3.147        |              |
| CG10713                                    | 1.227        | 3.241        |              |
| CG10618                                    | 1.219        | 3.140        |              |
| <b>CG14688</b>                             | <b>1.210</b> | <b>3.002</b> |              |
| CG30389                                    | 1.206        | 3.147        |              |
| CG7275                                     | 1.206        | 3.070        |              |
| CG30387                                    | 1.203        | 3.151        |              |
| CG11808                                    | 1.199        | 4.105        |              |
| CG13213                                    | 1.194        | 5.024        |              |
| CG5597                                     | 1.190        | 2.982        |              |
| CG7549                                     | 1.179        | 3.345        |              |
| CG17111                                    | 1.178        | 3.652        |              |
| CG2641                                     | 1.172        | 3.006        |              |
| CG31772                                    | 1.171        | 3.190        |              |
| CG33129                                    | 1.170        | 2.908        |              |
| female-specific independent of transformer | 1.165        | 2.817        |              |
| Olfactory-specific 9                       | 1.153        | 3.432        |              |
| <b>CG16743</b>                             | <b>1.146</b> | <b>3.234</b> |              |
| CG6852                                     | 1.146        | 2.821        |              |
| CG3732                                     | 1.145        | 3.292        |              |
| CG15383                                    | 1.145        | 2.847        |              |
| CG7175                                     | 1.137        | 3.077        |              |
| CG1623                                     | 1.137        | 2.801        |              |
| CG4042                                     | 1.136        | 3.591        |              |
| CG12190                                    | 1.133        | 3.632        |              |
| CG10778                                    | 1.128        | 2.878        |              |
| CG3698                                     | 1.126        | 3.224        |              |
| CG31436                                    | 1.124        | 3.384        |              |
| CG9396                                     | 1.123        | 3.074        |              |
| CG5053                                     | 1.116        | 5.025        |              |
| CG18766                                    | 1.109        | 4.415        |              |
| CG31948                                    | 1.106        | 3.249        |              |
| CG2330                                     | 1.098        | 2.738        |              |
| CG10205                                    | 1.097        | 3.174        |              |
| <b>CG15825</b>                             | <b>1.096</b> | <b>2.942</b> |              |
| CG9511                                     | 1.085        | 3.677        |              |
| CG14883                                    | 1.074        | 2.847        |              |
| CG3501                                     | 1.073        | 2.876        |              |
| Ela                                        | 1.071        | 3.171        | Elastin-like |
| CG10343                                    | 1.060        | 2.590        |              |
| CG10562                                    | 1.040        | 2.496        |              |
| CG15887                                    | 1.032        | 2.632        |              |

|                |              |              |          |
|----------------|--------------|--------------|----------|
| CG1468         | 1.019        | 2.646        |          |
| CG16826        | 1.014        | 8.853        |          |
| CG13794        | 1.001        | 3.359        |          |
| CG7519         | 0.996        | 2.560        |          |
| CG4930         | 0.995        | 2.465        |          |
| CG14450        | 0.992        | 2.383        |          |
| CG12025        | 0.971        | 2.491        |          |
| CG6665         | 0.970        | 2.384        |          |
| CG32210        | 0.950        | 2.597        |          |
| CG1074         | 0.946        | 2.435        |          |
| CG1785         | 0.944        | 2.417        |          |
| CG6769         | 0.933        | 2.371        |          |
| CG13078        | 0.932        | 2.331        |          |
| CG11753        | 0.931        | 2.310        |          |
| CG3857         | 0.928        | 3.321        |          |
| CG11781        | 0.921        | 2.227        |          |
| CG18081        | 0.918        | 2.425        |          |
| CG15456        | 0.917        | 2.261        |          |
| CG12292        | 0.914        | 2.407        |          |
| CG9572         | 0.910        | 2.315        |          |
| CG14021        | 0.905        | 2.441        |          |
| CG12868        | 0.903        | 2.235        |          |
| CG3002         | 0.902        | 2.351        |          |
| lcs            | 0.891        | 4.607        | la costa |
| CG13908        | 0.891        | 2.215        |          |
| CG10910        | 0.889        | 7.173        |          |
| CG11103        | 0.887        | 2.231        |          |
| CG3735         | 0.883        | 2.197        |          |
| CG3167         | 0.883        | 2.311        |          |
| <b>CG10680</b> | <b>0.876</b> | <b>2.354</b> |          |
| CG14984        | 0.875        | 2.147        |          |
| CG4893         | 0.872        | 2.343        |          |
| CG5080         | 0.867        | 2.160        |          |
| CG11737        | 0.865        | 2.148        |          |
| CG6643         | 0.863        | 2.430        |          |
| CG3597         | 0.863        | 2.150        |          |
| CG6630         | 0.861        | 2.280        |          |
| CG15209        | 0.856        | 2.212        |          |
| CG6204         | 0.856        | 2.460        |          |
| CG2813         | 0.852        | 2.387        |          |
| CG12075        | 0.852        | 2.386        |          |
| CG6061         | 0.851        | 2.318        |          |
| CG14481        | 0.845        | 2.343        |          |
| CG7299         | 0.844        | 2.214        |          |
| CG17244        | 0.838        | 2.222        |          |
| CG17734        | 0.835        | 2.125        |          |
| CG14224        | 0.833        | 2.542        |          |
| <b>CG15067</b> | <b>0.832</b> | <b>2.155</b> |          |
| CG8928         | 0.828        | 2.101        |          |
| CG18278        | 0.827        | 2.082        |          |
| CG30503        | 0.824        | 2.131        |          |
| CG17189        | 0.818        | 2.139        |          |
| CG14184        | 0.817        | 2.179        |          |
| CG7781         | 0.816        | 2.615        |          |
| CG5346         | 0.815        | 2.013        |          |
| CG7946         | 0.815        | 2.088        |          |
| <b>CG5778</b>  | <b>0.812</b> | <b>2.256</b> |          |

|                          |       |       |                             |
|--------------------------|-------|-------|-----------------------------|
| CG10420                  | 0.811 | 2.061 |                             |
| CG12194                  | 0.807 | 2.109 |                             |
| SCP-containing protein B | 0.804 | 4.090 |                             |
| CG30296                  | 0.801 | 2.397 |                             |
| CG9394                   | 0.799 | 2.134 |                             |
| CG7888                   | 0.797 | 2.255 |                             |
| CG9862                   | 0.795 | 2.053 |                             |
| CG6912                   | 0.794 | 2.215 |                             |
| CG9338                   | 0.792 | 2.156 |                             |
| CG11073                  | 0.791 | 2.258 |                             |
| CG14277                  | 0.782 | 2.156 |                             |
| CG6294                   | 0.781 | 2.052 |                             |
| CG16978                  | 0.777 | 2.117 |                             |
| CG6834                   | 0.777 | 2.451 |                             |
| CG3672                   | 0.776 | 2.007 |                             |
| CG7845                   | 0.776 | 2.157 |                             |
| CG13607                  | 0.771 | 2.251 |                             |
| CG31751                  | 0.768 | 2.038 |                             |
| CG15099                  | 0.766 | 2.442 |                             |
| CG17660                  | 0.764 | 2.021 |                             |
| CG31126                  | 0.762 | 2.009 |                             |
| CG2063                   | 0.760 | 2.068 |                             |
| CG6479                   | 0.760 | 2.128 |                             |
| CG8198                   | 0.760 | 2.224 |                             |
| CG6043                   | 0.759 | 2.344 |                             |
| CG6416                   | 0.759 | 2.214 |                             |
| CG4710                   | 0.756 | 2.397 |                             |
| CG11652                  | 0.755 | 2.159 |                             |
| CG10332                  | 0.747 | 2.054 |                             |
| CG5727                   | 0.746 | 2.049 |                             |
| CG33156                  | 0.742 | 2.056 |                             |
| CG1443                   | 0.741 | 2.145 |                             |
| CG1540                   | 0.740 | 2.018 |                             |
| CG13947                  | 0.738 | 2.321 |                             |
| CG10326                  | 0.734 | 2.030 | integral to plasma membrane |
| CG1358                   | 0.734 | 2.108 |                             |
| CG6803                   | 0.731 | 2.111 |                             |
| CG13830                  | 0.731 | 2.128 |                             |
| CG4269                   | 0.724 | 2.234 |                             |
| CG4841                   | 0.714 | 2.316 |                             |
| CG7245                   | 0.709 | 2.244 |                             |
| CG16884                  | 0.702 | 2.426 |                             |
| CG30492                  | 0.701 | 2.118 |                             |
| CG10639                  | 0.698 | 2.083 |                             |
| CG13604                  | 0.695 | 2.114 |                             |
| CG9801                   | 0.690 | 2.197 |                             |
| CG9497                   | 0.684 | 2.141 |                             |
| CG13335                  | 0.683 | 2.011 |                             |
| CG5741                   | 0.681 | 2.214 |                             |
| CG33056                  | 0.678 | 2.042 |                             |
| CG31778                  | 0.673 | 2.209 |                             |
| CG12239                  | 0.668 | 2.150 |                             |
| CG2121                   | 0.659 | 2.089 |                             |
| CG31058                  | 0.648 | 2.131 |                             |
| CG9686                   | 0.646 | 2.069 |                             |
| CG16953                  | 0.638 | 2.033 |                             |
| CG3825                   | 0.637 | 2.009 |                             |

|         |       |       |  |
|---------|-------|-------|--|
| CG6040  | 0.607 | 2.841 |  |
| CG12808 | 0.602 | 2.157 |  |
| CG7053  | 0.592 | 2.022 |  |
| CG13091 | 0.587 | 2.136 |  |
| CG8736  | 0.576 | 2.001 |  |
| CG2247  | 0.574 | 2.083 |  |
|         |       |       |  |
|         |       |       |  |

## Genes that are upregulated in rosy

| Genes                               | Score  | $\Delta$ | Description                                                                                                                                                                                |
|-------------------------------------|--------|----------|--------------------------------------------------------------------------------------------------------------------------------------------------------------------------------------------|
| <b>Metabolism</b>                   |        |          |                                                                                                                                                                                            |
| <b>Carbohydrate</b>                 |        |          |                                                                                                                                                                                            |
| Ugt36Bc                             | -1.914 | 12.161   | glucuronosyltransferase activity                                                                                                                                                           |
| CG17322                             | -1.865 | 8.320    | 2-hydroxyacylsphingosine 1-beta-galactosyltransferase activity                                                                                                                             |
| alpha Mannosidase II                | -1.500 | 4.272    | Golgi apparatus; Golgi membrane; Golgi stack; N-linked glycosylation; endoplasmic reticulum; mannosyl-oligosaccharide 1,3-1,6-alpha-mannosidase activity; protein amino acid glycosylation |
| CG31100                             | -1.196 | 2.993    | integral to membrane; monosaccharide transport; monosaccharide transporter activity                                                                                                        |
| CG11909                             | -1.064 | 2.801    | alpha-glucosidase activity; alpha-glucosidase complex                                                                                                                                      |
| COQ7                                | -0.976 | 2.371    | mitochondrial inner membrane; ubiquinone metabolism                                                                                                                                        |
| <b>Protein</b>                      |        |          |                                                                                                                                                                                            |
| CG10602                             | -1.114 | 2.813    | leukotriene-A4 hydrolase activity                                                                                                                                                          |
| CG1859                              | -1.082 | 2.776    | serine-type endopeptidase inhibitor activity                                                                                                                                               |
| small optic lobes                   | -1.047 | 2.675    | calpain activity; visual behavior                                                                                                                                                          |
| Tequila                             | -0.998 | 3.477    | pancreatic elastase activity; proteolysis and peptidolysis; serine-type endopeptidase activity; trypsin activity                                                                           |
| mitochondrial ribosomal protein S26 | -0.964 | 2.336    | mitochondrial small ribosomal subunit; protein biosynthesis; structural constituent of ribosome                                                                                            |
| CG8830                              | -0.956 | 2.557    | protein deubiquitination; ubiquitin-specific protease activity                                                                                                                             |
| <b>Lipid</b>                        |        |          |                                                                                                                                                                                            |
| CG33116                             | -1.388 | 5.611    | CDP-alcohol phosphotransferase activity                                                                                                                                                    |
| CG6567                              | -1.056 | 2.770    | lysophospholipase activity                                                                                                                                                                 |
| <b>Nucleic Acid/Amino Acid</b>      |        |          |                                                                                                                                                                                            |
| CG30104                             | -1.505 | 5.095    | nucleobase, nucleoside, nucleotide and nucleic acid metabolism; nucleotide phosphatase activity                                                                                            |
| CG10623                             | -1.138 | 2.770    | selenocysteine methyltransferase activity                                                                                                                                                  |
| CG6045                              | -0.966 | 2.491    | xanthine dehydrogenase activity                                                                                                                                                            |
| Adenine phosphoribosyltransferase   | -0.950 | 2.336    | adenine phosphoribosyltransferase activity; cytoplasm; purine ribonucleoside salvage                                                                                                       |
| <b>Redox</b>                        |        |          |                                                                                                                                                                                            |
| Cyp6a17                             | -1.756 | 24.201   | cytochrome P450 activity; membrane; microsome                                                                                                                                              |
| Cyp6d2                              | -1.305 | 3.770    | cytochrome P450 activity; membrane; microsome                                                                                                                                              |
| Cytochrome P450-4e3                 | -1.143 | 5.050    | cytochrome P450 activity; membrane; microsome                                                                                                                                              |
| Cyp4p2                              | -1.140 | 3.224    | cytochrome P450 activity; membrane; microsome                                                                                                                                              |
| <b>Chaperone</b>                    |        |          |                                                                                                                                                                                            |
| CG3492                              | -1.032 | 2.772    | chaperone activity                                                                                                                                                                         |
| <b>Cell-cell signaling</b>          |        |          |                                                                                                                                                                                            |
| Neuropeptide-like precursor 3       | -1.591 | 5.987    | extracellular; neuropeptide hormone activity; neuropeptide signaling pathway                                                                                                               |
| CG32843                             | -1.148 | 3.356    | G-protein coupled receptor protein signaling pathway; calcitonin receptor activity; integral to membrane; neuropeptide receptor activity; secretin-like receptor activity                  |
| CG16832                             | -1.023 | 2.786    | transmembrane receptor activity; existence uncertain                                                                                                                                       |

|                                              |        |        |                                                                                                                                                                                                                                                                                                                                                                                                                                                                                                      |
|----------------------------------------------|--------|--------|------------------------------------------------------------------------------------------------------------------------------------------------------------------------------------------------------------------------------------------------------------------------------------------------------------------------------------------------------------------------------------------------------------------------------------------------------------------------------------------------------|
| CG3814                                       | -0.991 | 2.639  | N-methyl-D-aspartate selective glutamate receptor activity; N-methyl-D-aspartate selective glutamate receptor complex                                                                                                                                                                                                                                                                                                                                                                                |
| <b>Intracellular signaling</b>               |        |        |                                                                                                                                                                                                                                                                                                                                                                                                                                                                                                      |
| CG32465                                      | -1.877 | 10.049 | NOT carboxylesterase activity; neurexin binding                                                                                                                                                                                                                                                                                                                                                                                                                                                      |
| pr-set7                                      | -1.586 | 8.217  | histone methylation; histone lysine N-methyltransferase activity (H4-K20 specific)                                                                                                                                                                                                                                                                                                                                                                                                                   |
| CNG channel-like                             | -1.478 | 5.476  | intracellular cyclic nucleotide activated cation channel activity                                                                                                                                                                                                                                                                                                                                                                                                                                    |
| carnation                                    | -1.300 | 3.922  | SNARE binding; cytosol; endosome to lysosome transport; eye pigmentation (sensu Drosophila); intracellular transport; lysosome organization and biogenesis; membrane; ommochrome biosynthesis; vesicle-mediated transport                                                                                                                                                                                                                                                                            |
| <b>Transcription Factor, DNA/RNA binding</b> |        |        |                                                                                                                                                                                                                                                                                                                                                                                                                                                                                                      |
| quaking related 54B                          | -1.479 | 5.012  | RNA binding                                                                                                                                                                                                                                                                                                                                                                                                                                                                                          |
| Hormone receptor-like in 96                  | -1.390 | 4.488  | DNA binding; ligand-dependent nuclear receptor activity; nucleus; transcription factor activity                                                                                                                                                                                                                                                                                                                                                                                                      |
| period                                       | -1.155 | 3.247  | behavioral response to cocaine; circadian rhythm; circadian sleep/wake cycle; courtship behavior; cytoplasm; eclosion rhythm; locomotor rhythm; male courtship behavior (sensu Insecta), song production; mating behavior; negative regulation of transcription from Pol II promoter; nucleus; regulation of circadian sleep/wake cycle, sleep; response to light; response to temperature; rhythmic behavior; transcription cofactor activity; transcription corepressor activity; ultradian rhythm |
| CG7185                                       | -1.152 | 3.460  | RNA binding; mRNA cleavage; mRNA cleavage factor complex                                                                                                                                                                                                                                                                                                                                                                                                                                             |
| Cyclin C                                     | -1.095 | 2.895  | G1/S transition of mitotic cell cycle; RNA polymerase II transcription mediator activity; cyclin-dependent protein kinase regulator activity; mediator complex; nuclear cyclin-dependent protein kinase holoenzyme complex; transcription initiation from Pol II promoter                                                                                                                                                                                                                            |
| okra                                         | -1.043 | 2.653  | ATP-dependent DNA helicase activity; DNA recombination; DNA repair; chromosome condensation; dorsal appendage formation; double-strand break repair; female gamete generation; meiotic recombination                                                                                                                                                                                                                                                                                                 |
| Trap80                                       | -1.002 | 2.468  | RNA polymerase II transcription mediator activity; cell growth and/or maintenance; mediator complex; nucleus; sex comb development; transcription from Pol II promoter; transcription initiation from Pol II promoter                                                                                                                                                                                                                                                                                |
| CG6133                                       | -0.969 | 2.486  | DNA (cytosine-5-)-methyltransferase activity                                                                                                                                                                                                                                                                                                                                                                                                                                                         |
| <b>Transporter</b>                           |        |        |                                                                                                                                                                                                                                                                                                                                                                                                                                                                                                      |
| brown                                        | -1.201 | 3.352  | ATP-binding cassette (ABC) transporter activity; eye pigment biosynthesis; eye pigment precursor transport; eye pigment precursor transporter activity; integral to plasma membrane; ommochrome biosynthesis; pteridine biosynthesis                                                                                                                                                                                                                                                                 |
| Monocarboxylate transporter 1                | -1.095 | 2.773  | monocarboxylic acid transporter activity                                                                                                                                                                                                                                                                                                                                                                                                                                                             |
| CG1718                                       | -0.972 | 2.795  | ATP-binding cassette (ABC) transporter activity                                                                                                                                                                                                                                                                                                                                                                                                                                                      |
| <b>Development</b>                           |        |        |                                                                                                                                                                                                                                                                                                                                                                                                                                                                                                      |
| CG13185                                      | -1.505 | 5.451  | cell cycle; nucleic acid binding                                                                                                                                                                                                                                                                                                                                                                                                                                                                     |
| sticky ch1                                   | -1.278 | 3.885  | peripheral nervous system development                                                                                                                                                                                                                                                                                                                                                                                                                                                                |
| Glued                                        | -0.998 | 2.454  | cell fate determination; cytoplasm; dynactin complex; dynein binding; eye photoreceptor development (sensu Drosophila); female gamete generation; microtubule motor activity; microtubule-based movement; photoreceptor differentiation (sensu Drosophila); retrograde axon cargo transport; rhabdomere development; second mitotic wave (sensu Drosophila)                                                                                                                                          |
| multiple ankyrin repeats single KH domain    | -0.997 | 2.690  | cell growth and/or maintenance; cell proliferation; cytoskeletal anchoring; photoreceptor differentiation (sensu Drosophila); structural constituent of cytoskeleton; transmembrane receptor protein tyrosine kinase signaling pathway                                                                                                                                                                                                                                                               |
| <b>Other/Unknown</b>                         |        |        |                                                                                                                                                                                                                                                                                                                                                                                                                                                                                                      |
| CG31152                                      | -1.765 | 10.060 |                                                                                                                                                                                                                                                                                                                                                                                                                                                                                                      |

|          |        |       |                                                                                                                                                                                                             |
|----------|--------|-------|-------------------------------------------------------------------------------------------------------------------------------------------------------------------------------------------------------------|
| CG14432  | -1.738 | 7.132 |                                                                                                                                                                                                             |
| CG15599  | -1.694 | 8.755 |                                                                                                                                                                                                             |
| CG9424   | -1.617 | 5.192 |                                                                                                                                                                                                             |
| CG12417  | -1.545 | 5.099 |                                                                                                                                                                                                             |
| CG4294   | -1.545 | 5.709 |                                                                                                                                                                                                             |
| CG11893  | -1.439 | 7.051 |                                                                                                                                                                                                             |
| CG10681  | -1.414 | 3.839 |                                                                                                                                                                                                             |
| CG33203  | -1.374 | 4.369 |                                                                                                                                                                                                             |
| CG16812  | -1.356 | 3.635 |                                                                                                                                                                                                             |
| CG11693  | -1.329 | 3.562 |                                                                                                                                                                                                             |
| CG33154  | -1.319 | 3.504 |                                                                                                                                                                                                             |
| CG30181  | -1.290 | 3.854 |                                                                                                                                                                                                             |
| CG12812  | -1.275 | 3.774 |                                                                                                                                                                                                             |
| CG32209  | -1.274 | 3.487 |                                                                                                                                                                                                             |
| CG5195   | -1.259 | 3.547 |                                                                                                                                                                                                             |
| CG31188  | -1.236 | 3.097 |                                                                                                                                                                                                             |
| CG7044   | -1.226 | 3.408 |                                                                                                                                                                                                             |
| CG18240  | -1.198 | 4.235 |                                                                                                                                                                                                             |
| CG32440  | -1.188 | 3.649 |                                                                                                                                                                                                             |
| CG8460   | -1.183 | 3.744 |                                                                                                                                                                                                             |
| GM130    | -1.172 | 3.296 | Golgi cis cisterna; Golgi organization and biogenesis; Golgi stack; endoplasmic reticulum                                                                                                                   |
| CG10395  | -1.160 | 3.423 |                                                                                                                                                                                                             |
| Andropin | -1.156 | 3.892 | Gram-positive antibacterial peptide activity; anti-Gram-positive bacterial polypeptide induction; extracellular; male-specific antibacterial humoral response; male-specific antibacterial peptide activity |
| CG18107  | -1.153 | 2.977 |                                                                                                                                                                                                             |
| CG31324  | -1.134 | 3.831 |                                                                                                                                                                                                             |
| SP2523   | -1.109 | 2.861 |                                                                                                                                                                                                             |
| CheA75a  | -1.106 | 3.154 |                                                                                                                                                                                                             |
| CG14130  | -1.099 | 2.648 |                                                                                                                                                                                                             |
| CheB93a  | -1.095 | 3.019 |                                                                                                                                                                                                             |
| CG7357   | -1.071 | 2.840 |                                                                                                                                                                                                             |
| CG31764  | -1.067 | 3.020 |                                                                                                                                                                                                             |
| CG32951  | -1.065 | 2.654 |                                                                                                                                                                                                             |
| CG5746   | -1.061 | 3.033 |                                                                                                                                                                                                             |
| CG14812  | -1.039 | 2.736 |                                                                                                                                                                                                             |
| CG17085  | -1.037 | 2.550 |                                                                                                                                                                                                             |
| CG4699   | -1.027 | 3.424 |                                                                                                                                                                                                             |
| CG10550  | -1.018 | 2.605 |                                                                                                                                                                                                             |
| CG5733   | -1.011 | 2.497 |                                                                                                                                                                                                             |
| CG4281   | -0.995 | 2.564 |                                                                                                                                                                                                             |
| CG12268  | -0.988 | 2.343 |                                                                                                                                                                                                             |
